# Supplementary material
Source: MDPI journal article supplement (https://www.mdpi.com/2073-4344/13/8/1216)
Supplement: s1 [file s1]

# Efficient conversion of monosaccharides into 5-hydroxymethylfurfural using acidic deep eutectic solvents

Linh Ngoc To <sup>1,2†</sup>, Trinh Hao Nguyen <sup>1,2†</sup>, Thien Phuoc Nguyen <sup>1,2</sup>, Ha Bich Phan <sup>1,2,3</sup>, Linh Ho Thuy Nguyen <sup>2,4</sup>, Tan Le Hoang Doan <sup>2,4</sup>, Chinh Van Dang <sup>3</sup> and Phuong Hoang Tran <sup>1,2,\*</sup>

<sup>1</sup> Department of Organic Chemistry, Faculty of Chemistry, University of Science, Ho Chi Minh City 700000, Vietnam.

<sup>2</sup> Vietnam National University, Ho Chi Minh City 700000, Vietnam.

<sup>3</sup> Institute of Public Health, Ho Chi Minh City 700000, Vietnam.

<sup>4</sup> Center for Innovative Materials and Architectures (INOMAR), Ho Chi Minh City 700000, Vietnam

† The authors contributed equally

\*Correspondence: +84-903-706-762; e-mail: thphuong@hcmus.edu.vn

## Table of Contents

|                                             |               |
|---------------------------------------------|---------------|
| <b>Section S1. Experimental section</b>     | <b>S2-S3</b>  |
| <b>Section S2. Characterization of DESs</b> | <b>S3-S6</b>  |
| <b>Section S3. HPLC chromatography</b>      | <b>S7-S97</b> |

## Section 1: Experimental section

### Chemical

Urea (>99%), iron (III)chloride (>99%), D-fructose (>99%), D-glucose (>99%), , tetrabutylammonium bromide (>99%), , D-chloroform (>99%), was purchased from Merck. Ethylene glycol (>99%), tetrahydrofuran (>99%) was collected from Xilong (China). Ethyl acetate (>99%), acetone (>99%), hexane (>99%), ethanol (>99%), methanol (>99%) was obtained from Chemsol (Vietnam). 5-Hydroxymethylfurfural (HMF) (>99%), 2,5-diformylfuran (DFF) (>99%), 2,5-Furandicarboxylic acid (FDCA) (>99%), furfural (Fur) (>99%), choline chloride (>99%), chromium (III) chloride hexahydrate (>99%), zinc chloride (>99%), fumaric acid (>99%), adipic acid (>99%), benzoic acid (>99%), malonic acid (>99%), tin (II) chloride dihydrate (>99%), and copper dichloride dihydrate (>99%) was obtained from Sigma-Aldrich. All chemical was used without further purification.

### Equipment

Thermogravimetric analysis (TGA) with model TGA/DSC3 (Mettler, Toledo, Switzerland) was used to analyze and evaluate the thermal stability of DES. Samples were calcined from room temperature to 800 °C with a scanning speed of 10 Kpm, in N<sub>2</sub>. Fourier-transform infrared spectroscopy (FTIR) were recorded on a Bruker's VERTEX 70 series FT-IR spectrometers with a measuring range of 600– 4000 cm<sup>-1</sup>.

The HMF was quantified by Agilent Technologies 1260 Infinity HPLC with a DAD de-tector at wavelength 285 nm. The column Inert Sustain C18 (5 µm, 4.6 × 150 mm) was used to separate the components of the reaction mixture. The column temperature was obtained at 30 °C. A mixture of methanol and 2.5 mM sulfuric acid was used as eluent with a flow rate of 0.7 mL min<sup>-1</sup>.

## Section 2: Characterization of DESs

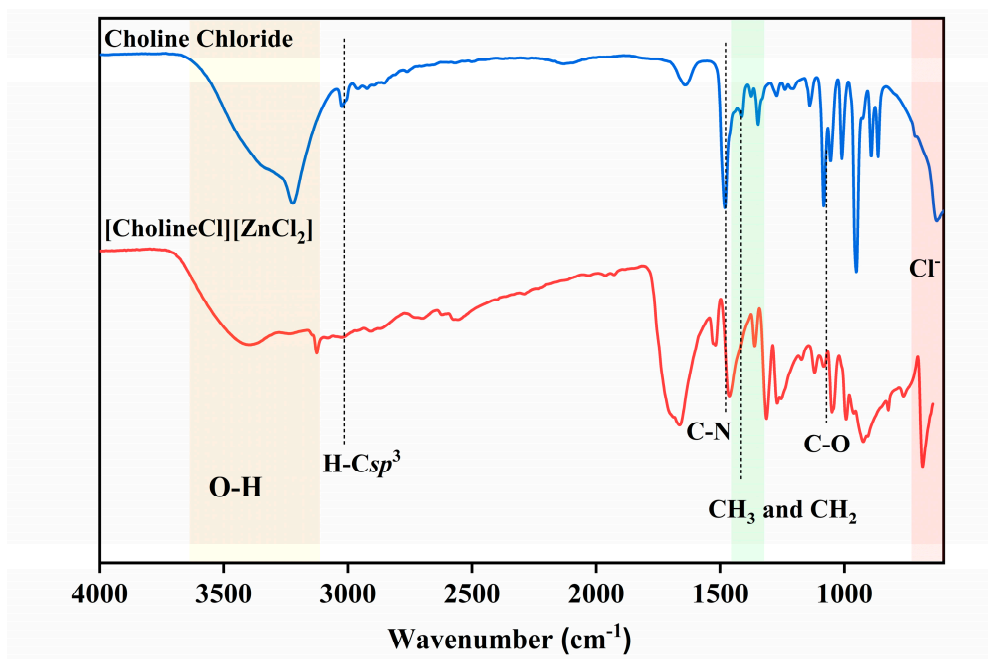

Figure S2.1: FTIR spectrum of [CholineCl][ZnCl<sub>2</sub>]

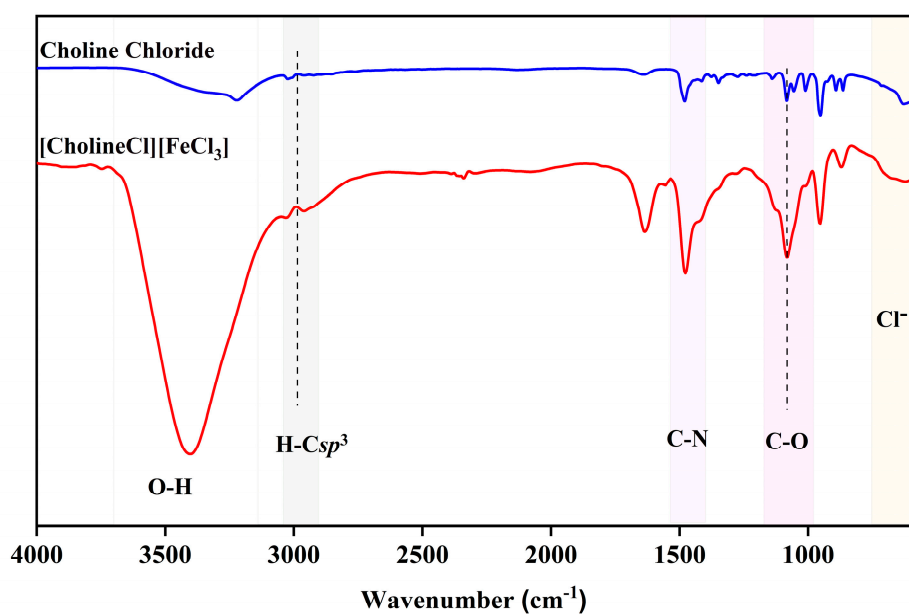

Figure S2.2: FTIR spectrum of [CholineCl][FeCl<sub>3</sub>]

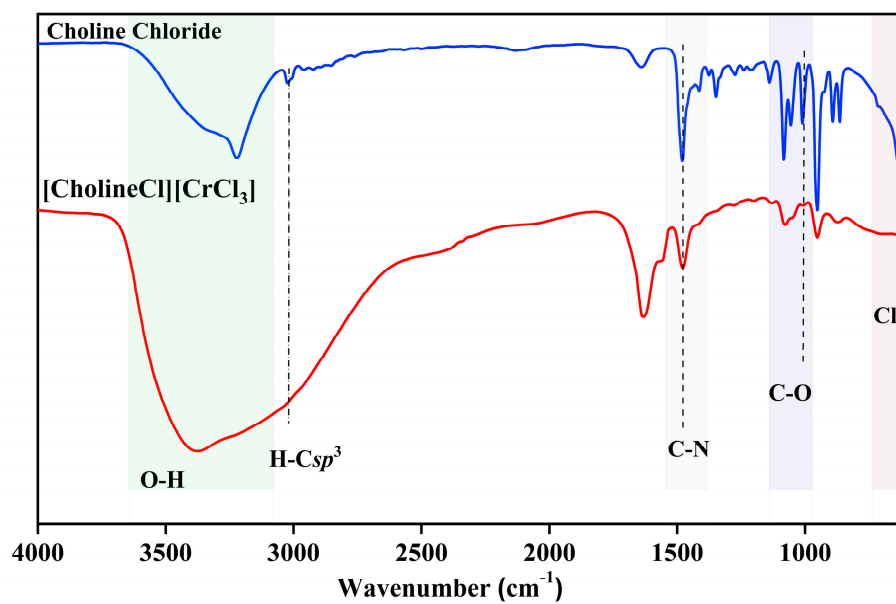

Figure S2.3: FTIR spectrum of [CholineCl][CrCl<sub>3</sub>]

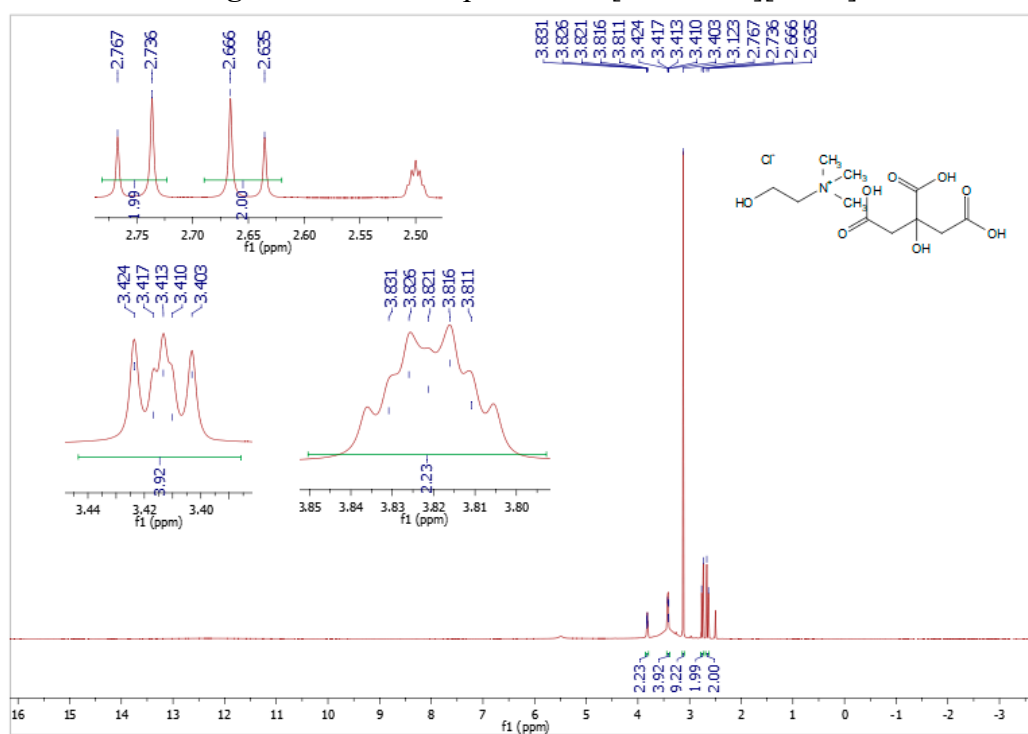

Figure S2.4: <sup>1</sup>H-NMR spectrum of [CholineCl][Citric acid]

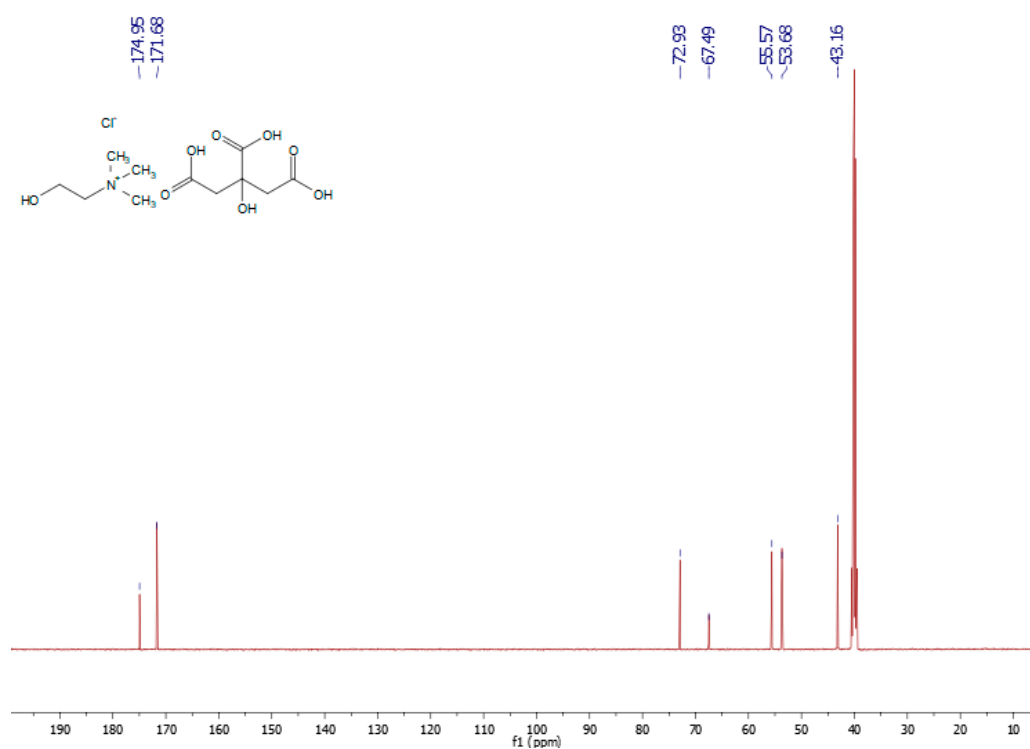

**Figure S2.5:**  $^{13}\text{C}$ -NMR spectrum of [CholineCl][Citric acid]

### Section 3: Characterization of HMF and calibration curve of HMF

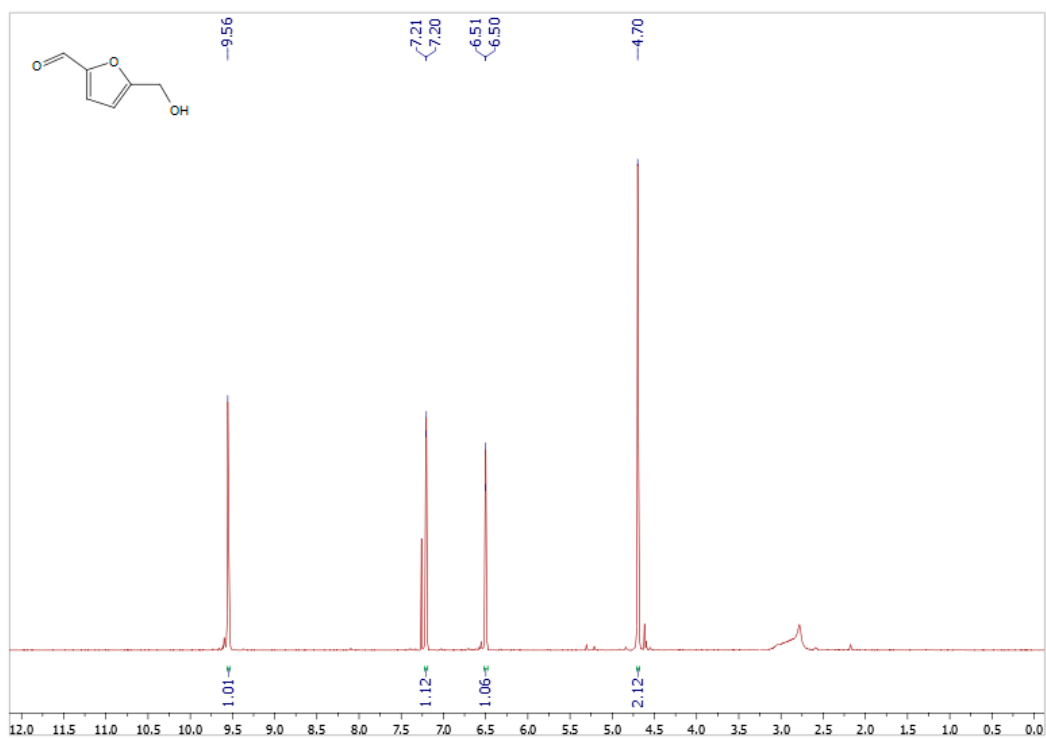

**Figure S3.1:**  $^1\text{H}$ -NMR spectrum of HMF

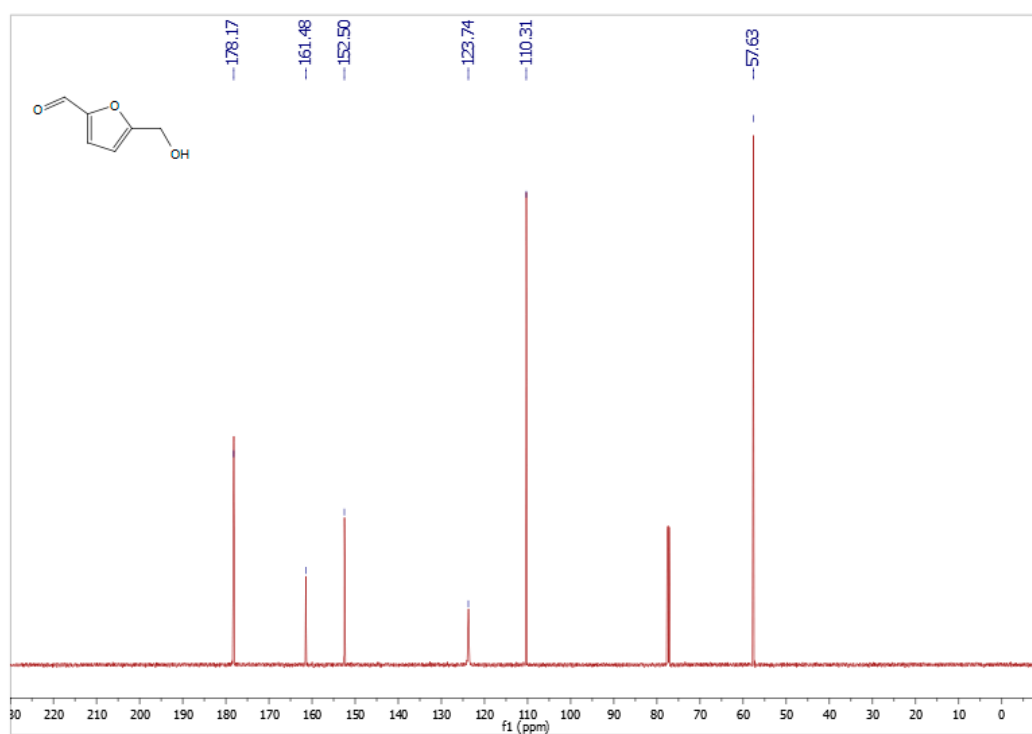

Figure S3.2:  $^{13}\text{C}$ -NMR spectrum of HMF

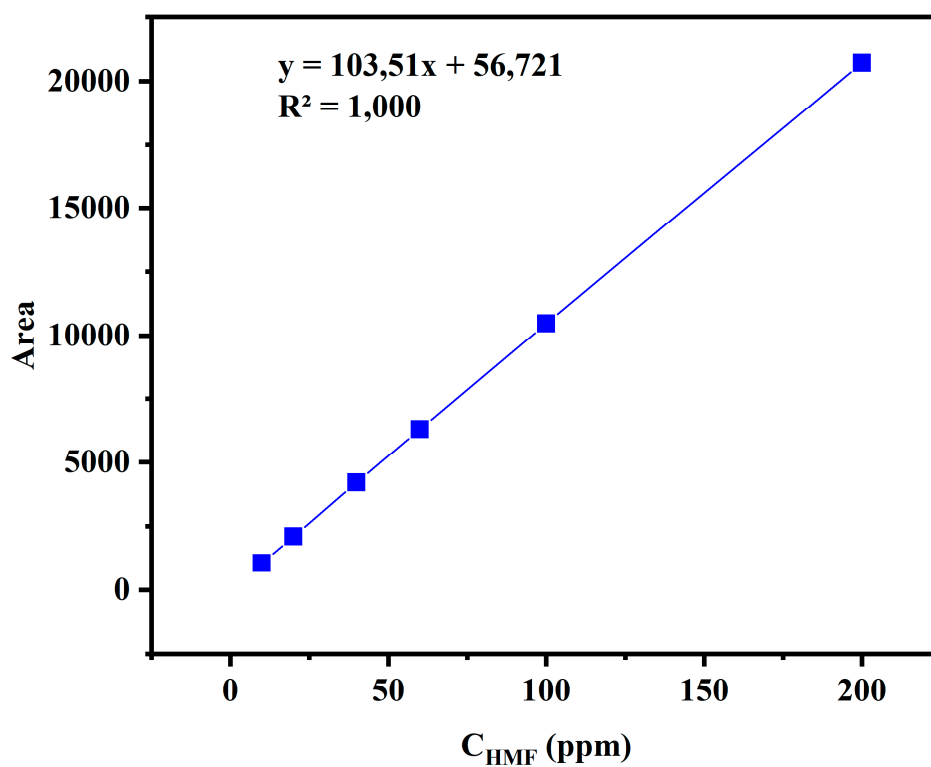

Figure S3.3: Calibration curve of HMF

## Section 4: HPLC chromatography

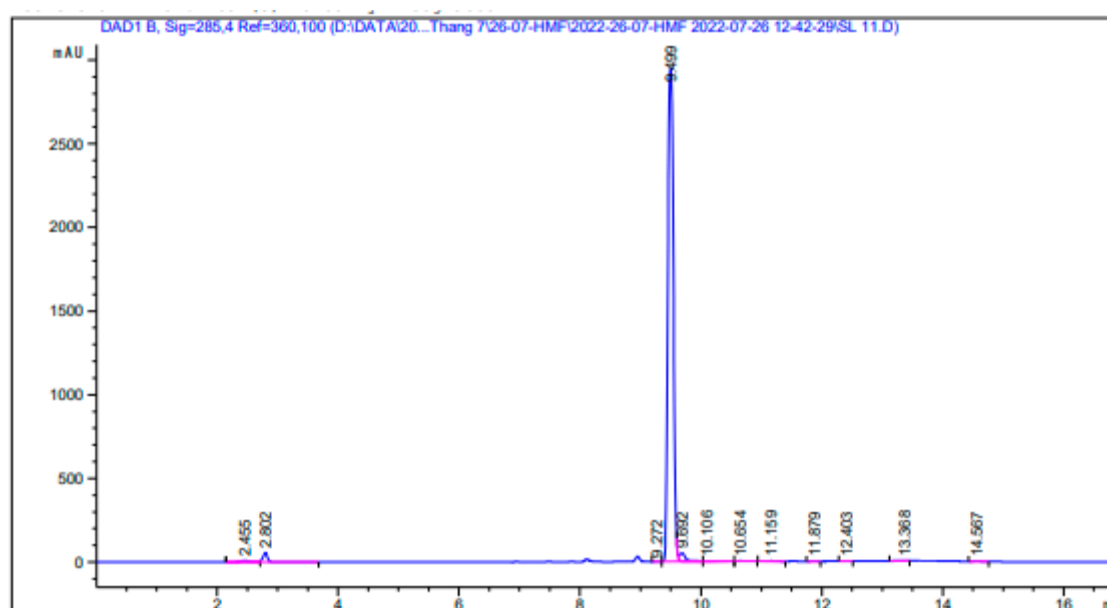

#### External Standard Report

Sorted By : Signal  
 Calib. Data Modified : 6/18/2022 1:43:53 AM  
 Multiplier : 1.0000  
 Dilution : 1.0000  
 Do not use Multiplier & Dilution Factor with ISTDs

Signal 1: DAD1 B, Sig=285,4 Ref=360,100

| RetTime<br>[min] | Type | Area<br>[mAU*s] | Amt/Area   | Amount<br>[ppm] | Grp | Name           |
|------------------|------|-----------------|------------|-----------------|-----|----------------|
| 8.900            | -    | -               | -          | -               | -   | Levulinic acid |
| 9.499            | BV R | 1.87197e4       | 9.62812e-3 | 180.23518       | -   | HMF            |
| 10.654           | BB   | 18.91986        | 2.74634e-2 | 5.19604e-1      | -   | DFF            |
| 11.159           | BB   | 21.26656        | 0.00000    | 0.00000         | -   | FDCA           |
| 11.300           | -    | -               | -          | -               | -   | Furfural       |

**Figure S4.1:** HPLC chromatography of HMF. Reaction condition: Fructose (1 mmol), DES 1 (5 mmol), 100 °C, 5 min.

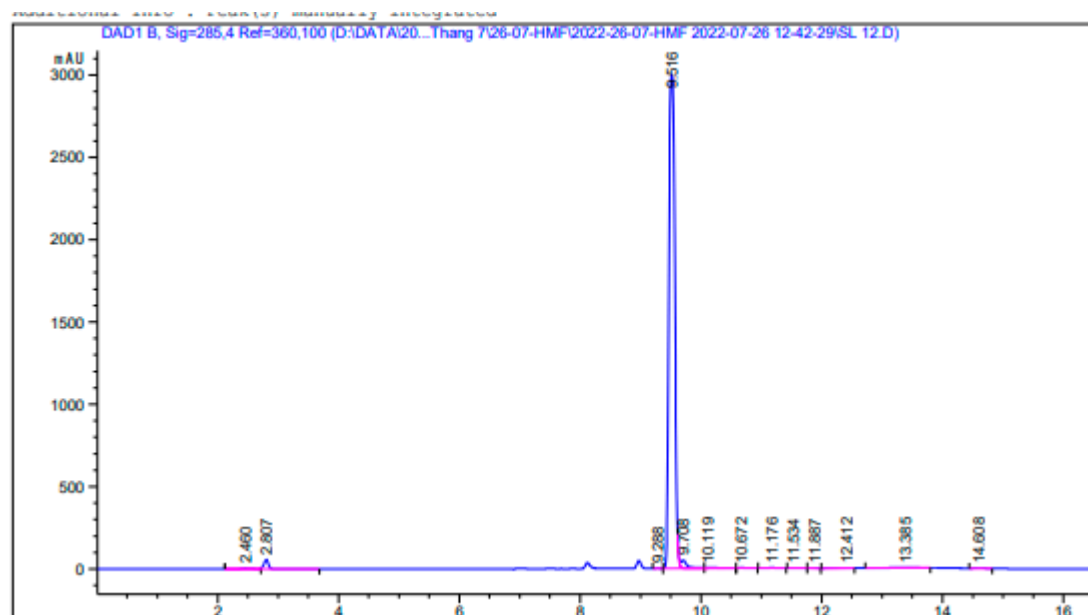

#### External Standard Report

Sorted By : Signal  
 Calib. Data Modified : 6/18/2022 1:43:53 AM  
 Multiplier : 1.0000  
 Dilution : 1.0000  
 Do not use Multiplier & Dilution Factor with ISTDs

Signal 1: DAD1 B, Sig=285,4 Ref=360,100

| RetTime<br>[min] | Type | Area<br>[mAU*s] | Amt/Area   | Amount<br>[ppm] | Grp | Name           |
|------------------|------|-----------------|------------|-----------------|-----|----------------|
| 8.900            | -    | -               | -          | -               | -   | Levulinic acid |
| 9.516            | BV R | 2.01682e4       | 9.62965e-3 | 194.21244       | -   | HMF            |
| 10.672           | BB   | 17.61892        | 2.87232e-2 | 5.06072e-1      | -   | DFF            |
| 11.176           | BB   | 26.74589        | 0.00000    | 0.00000         | -   | FDCA           |
| 11.534           | BV   | 6.54524         | 0.00000    | 0.00000         | -   | Furfural       |

**Figure S4. 2:** HPLC chromatography of HMF. Reaction condition: Fructose (1 mmol), DES 1 (5 mmol), 100 °C, 10 min.

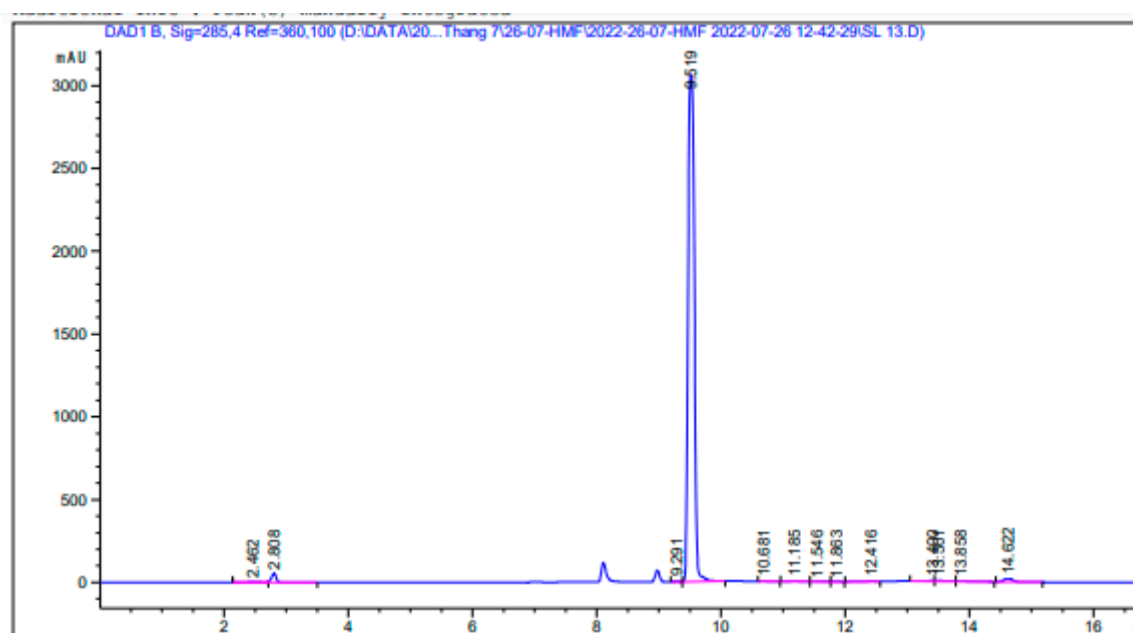

#### External Standard Report

Sorted By : Signal  
 Calib. Data Modified : 6/18/2022 1:43:53 AM  
 Multiplier : 1.0000  
 Dilution : 1.0000  
 Do not use Multiplier & Dilution Factor with ISTDs

Signal 1: DAD1 B, Sig=285,4 Ref=360,100

| RetTime<br>[min] | Type | Area<br>[mAU*s] | Amt/Area   | Amount<br>[ppm] | Grp | Name           |
|------------------|------|-----------------|------------|-----------------|-----|----------------|
| 8.900            | -    | -               | -          | -               |     | Levulinic acid |
| 9.519            | BB   | 2.10779e4       | 9.63050e-3 | 202.99041       |     | HMF            |
| 10.681           | BB   | 15.97031        | 3.06145e-2 | 4.88924e-1      |     | DFF            |
| 11.185           | BV   | 37.75508        | 0.00000    | 0.00000         |     | FDCA           |
| 11.546           | VV   | 21.10468        | 0.00000    | 0.00000         |     | Furfural       |

**Figure S4.3:** HPLC chromatography of HMF. Reaction condition: Fructose (1 mmol), DES 1 (5 mmol), 100 °C, 20 min.



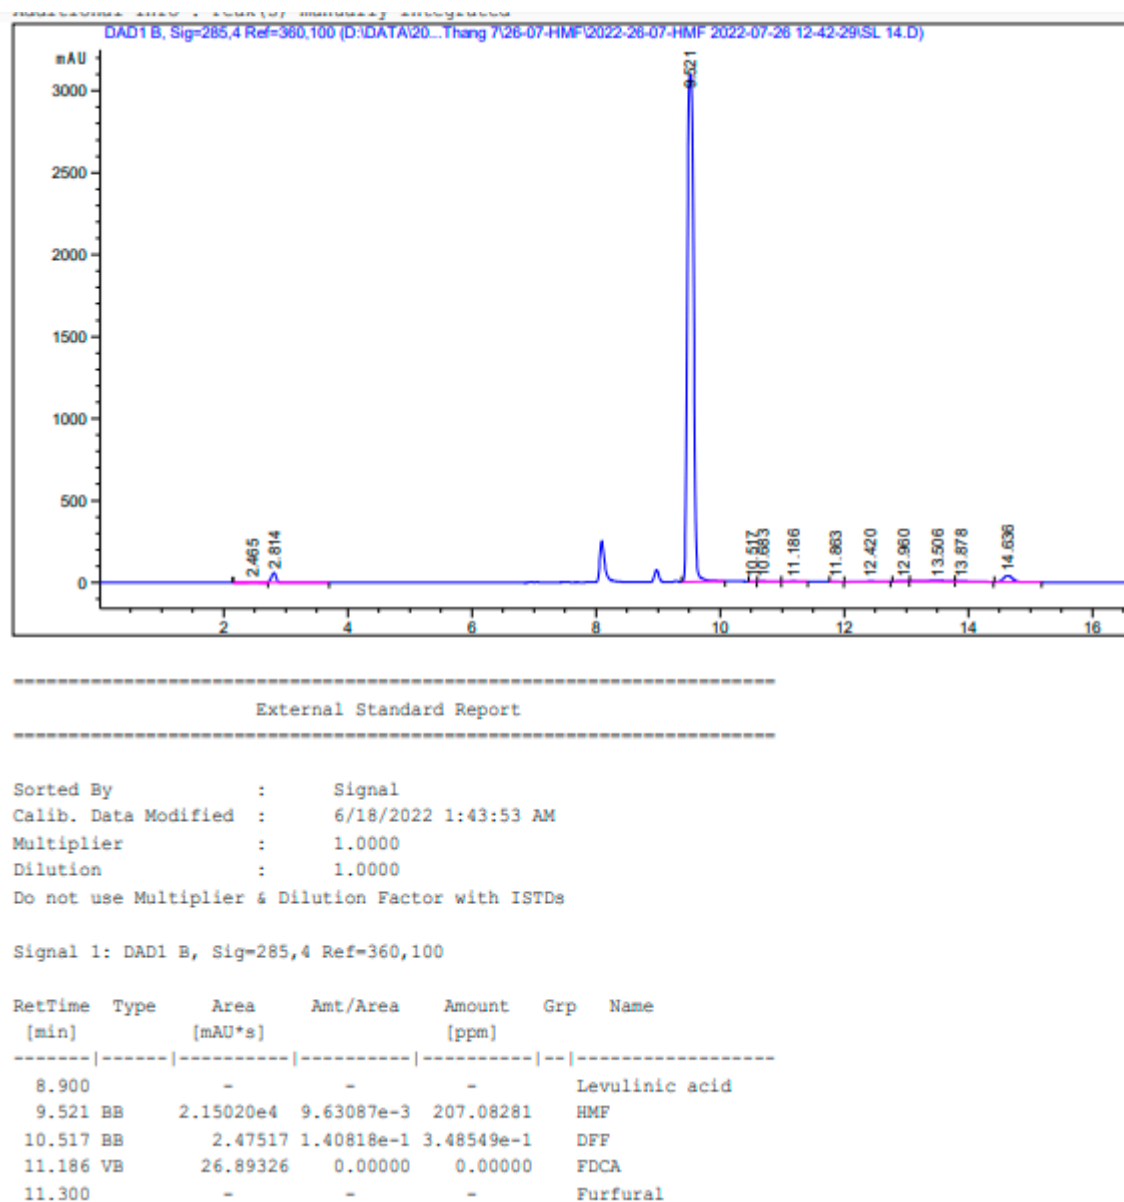

**Figure S4. 4:** HPLC chromatography of HMF. Reaction condition: Fructose (1 mmol), DES 1 (5 mmol), 100 °C, 30 min.

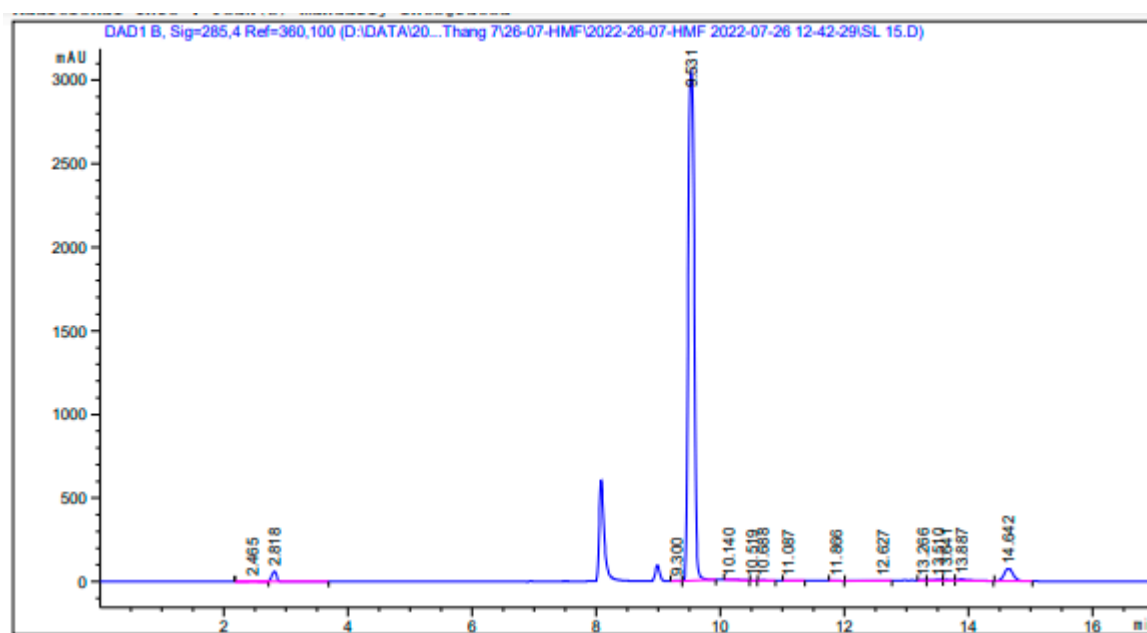

#### External Standard Report

Sorted By : Signal  
 Calib. Data Modified : 6/18/2022 1:43:53 AM  
 Multiplier : 1.0000  
 Dilution : 1.0000  
 Do not use Multiplier & Dilution Factor with ISTDs

Signal 1: DAD1 B, Sig=285,4 Ref=360,100

| RetTime<br>[min] | Type | Area<br>[mAU*s] | Amt/Area   | Amount<br>[ppm] | Grp | Name           |
|------------------|------|-----------------|------------|-----------------|-----|----------------|
| 8.900            | -    | -               | -          | -               | -   | Levulinic acid |
| 9.531            | BB   | 2.02327e4       | 9.62971e-3 | 194.83475       | -   | HMF            |
| 10.519           | BB   | 2.00498         | 1.71402e-1 | 3.43658e-1      | -   | DFF            |
| 11.087           | BB   | 9.82065         | 0.00000    | 0.00000         | -   | FDCA           |
| 11.300           | -    | -               | -          | -               | -   | Furfural       |

**Figure S4. 5:** HPLC chromatography of HMF. Reaction condition: Fructose (1 mmol), DES 1 (5 mmol), 100 °C, 60 min.

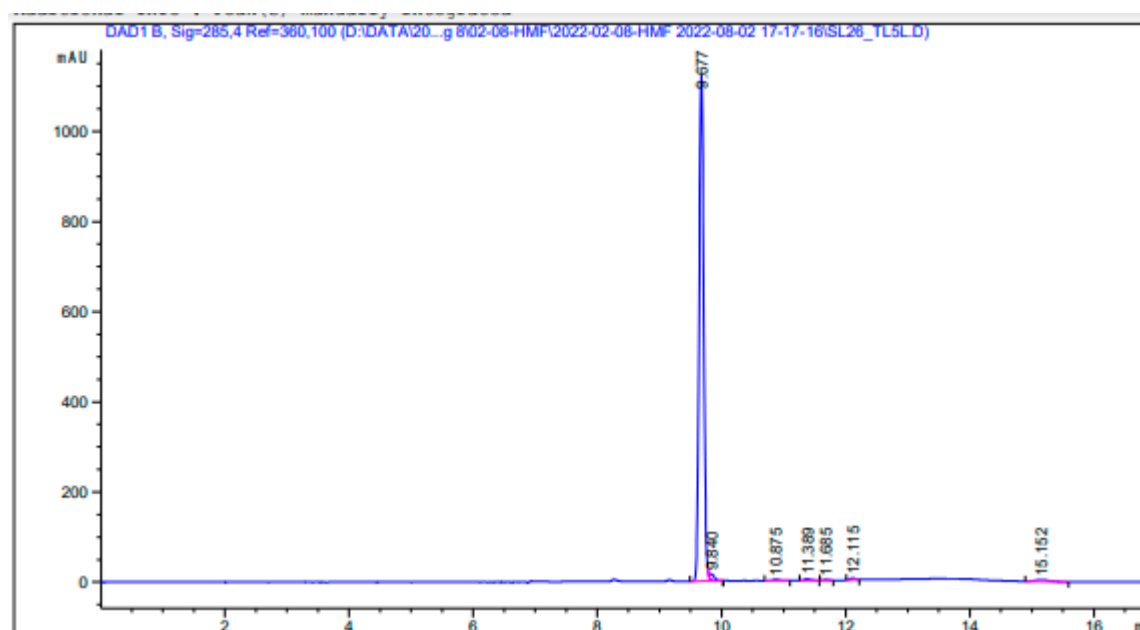

External Standard Report

Sorted By : Signal  
 Calib. Data Modified : 8/5/2022 1:49:08 AM  
 Multiplier : 1.0000  
 Dilution : 1.0000  
 Do not use Multiplier & Dilution Factor with ISTDs

Signal 1: DAD1 B, Sig=285,4 Ref=360,100

| RetTime<br>[min] | Type | Area<br>[mAU*s] | Amt/Area   | Amount<br>[ppm] | Grp | Name           |
|------------------|------|-----------------|------------|-----------------|-----|----------------|
| 8.900            | -    | -               | -          | -               | -   | Levulinic acid |
| 9.677            | BV R | 5727.15967      | 9.57982e-3 | 54.86517        | -   | HMF            |
| 10.201           | -    | -               | -          | -               | -   | DFF            |
| 10.875           | BB   | 20.97607        | 0.00000    | 0.00000         | -   | FDCA           |
| 11.389           | BB   | 21.08057        | 0.00000    | 0.00000         | -   | Furfural       |

**Figure S4. 6:** HPLC chromatography of HMF. Reaction condition: Fructose (1 mmol), DES 2 (5 mmol), 100 °C, 5 min.

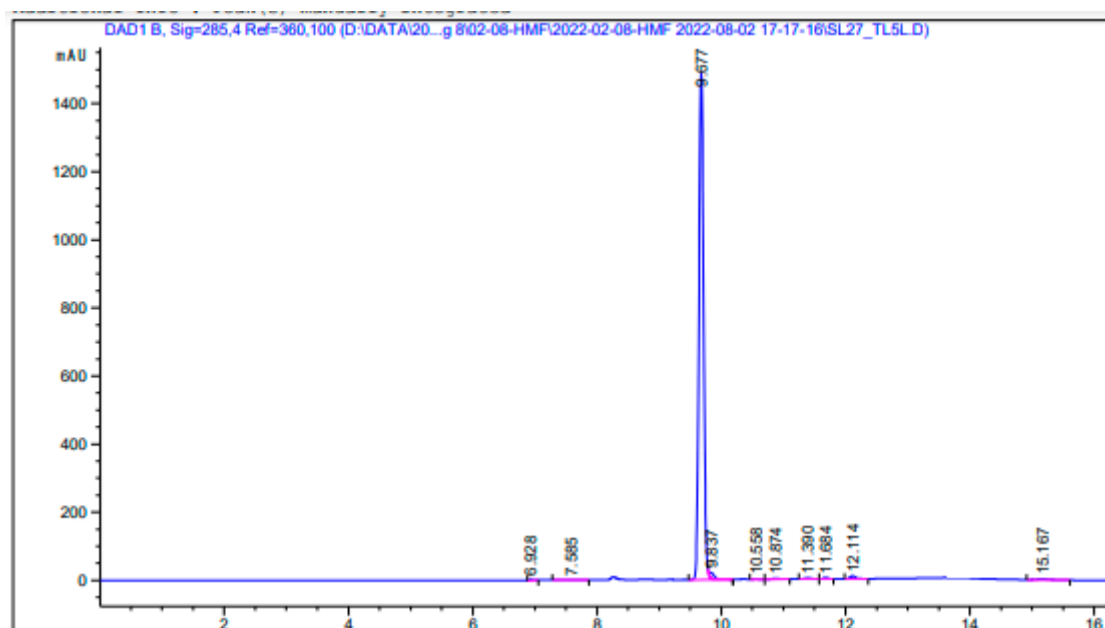

#### External Standard Report

Sorted By : Signal  
 Calib. Data Modified : 8/5/2022 1:49:08 AM  
 Multiplier : 1.0000  
 Dilution : 1.0000  
 Do not use Multiplier & Dilution Factor with ISTDs

Signal 1: DAD1 B, Sig=285,4 Ref=360,100

| RetTime<br>[min] | Type | Area<br>[mAU*s] | Amt/Area   | Amount<br>[ppm] | Grp | Name           |
|------------------|------|-----------------|------------|-----------------|-----|----------------|
| 8.900            | -    | -               | -          | -               | -   | Levulinic acid |
| 9.677            | BV R | 7649.29150      | 9.59731e-3 | 73.41261        | -   | HMF            |
| 10.201           | -    | -               | -          | -               | -   | DFF            |
| 10.874           | BB   | 21.11240        | 0.00000    | 0.00000         | -   | FDCA           |
| 11.390           | BV   | 25.65583        | 4.75866e-4 | 1.22087e-2      | -   | Furfural       |

**Figure S4. 7:** HPLC chromatography of HMF. Reaction condition: Fructose (1 mmol), DES 2 (5 mmol), 100 °C, 10 min.

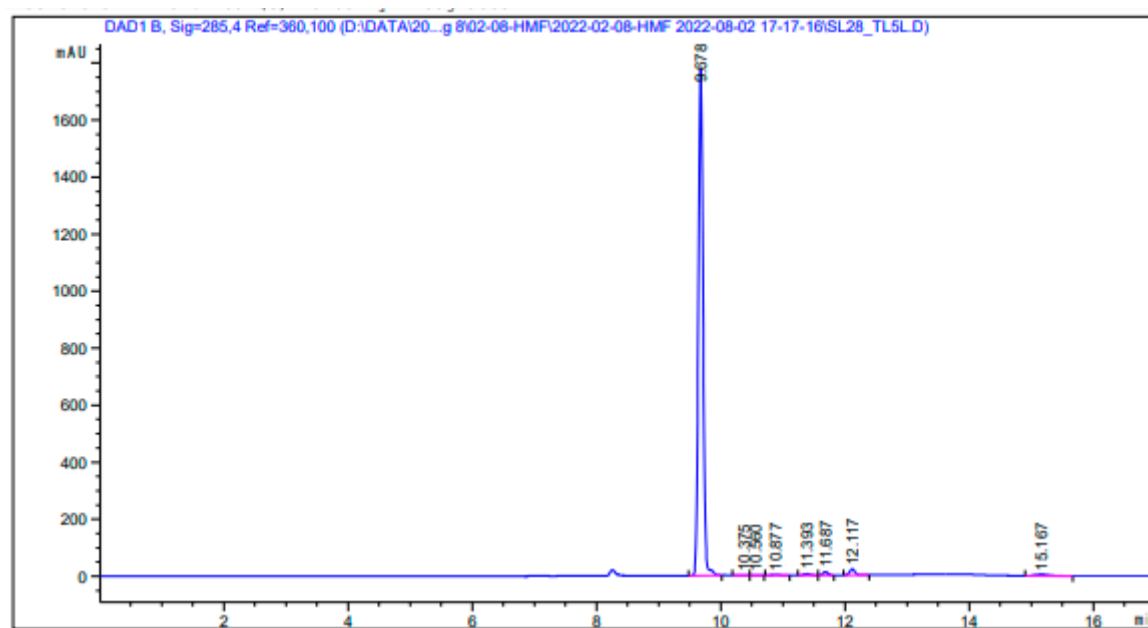

#### External Standard Report

Sorted By : Signal  
 Calib. Data Modified : 8/5/2022 1:49:08 AM  
 Multiplier : 1.0000  
 Dilution : 1.0000  
 Do not use Multiplier & Dilution Factor with ISTDs

Signal 1: DAD1 B, Sig=285,4 Ref=360,100

| RetTime<br>[min] | Type | Area<br>[mAU*s] | Amt/Area   | Amount<br>[ppm] | Grp | Name           |
|------------------|------|-----------------|------------|-----------------|-----|----------------|
| 8.900            | -    | -               | -          | -               | -   | Levulinic acid |
| 9.678            | BV R | 9262.65723      | 9.60638e-3 | 88.98063        |     | HMF            |
| 10.375           | BV   | 6.63925         | 5.90222e-2 | 3.91863e-1      |     | DFF            |
| 10.877           | BB   | 21.39795        | 0.00000    | 0.00000         |     | FDCA           |
| 11.393           | BV   | 31.51947        | 2.28775e-3 | 7.21087e-2      |     | Furfural       |

**Figure S4. 8:** HPLC chromatography of HMF. Reaction condition: Fructose (1 mmol), DES 2 (5 mmol), 100 °C, 20 min.

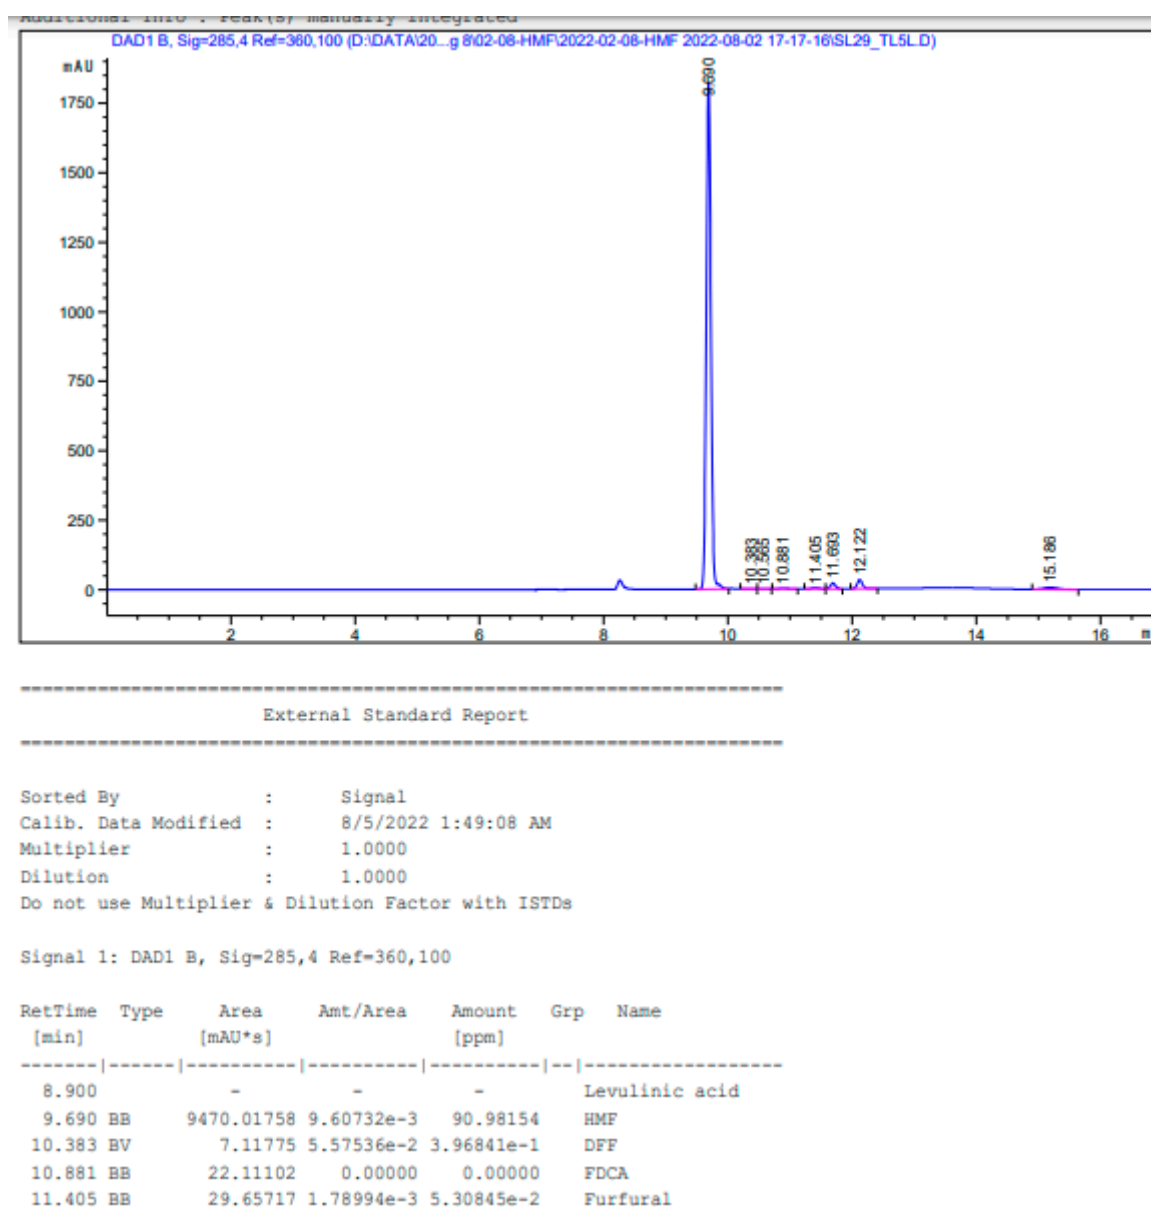

**Figure S4. 9:** HPLC chromatography of HMF. Reaction condtion: Fructose (1 mmol), DES 2 (5 mmol), 100 °C, 30 min.

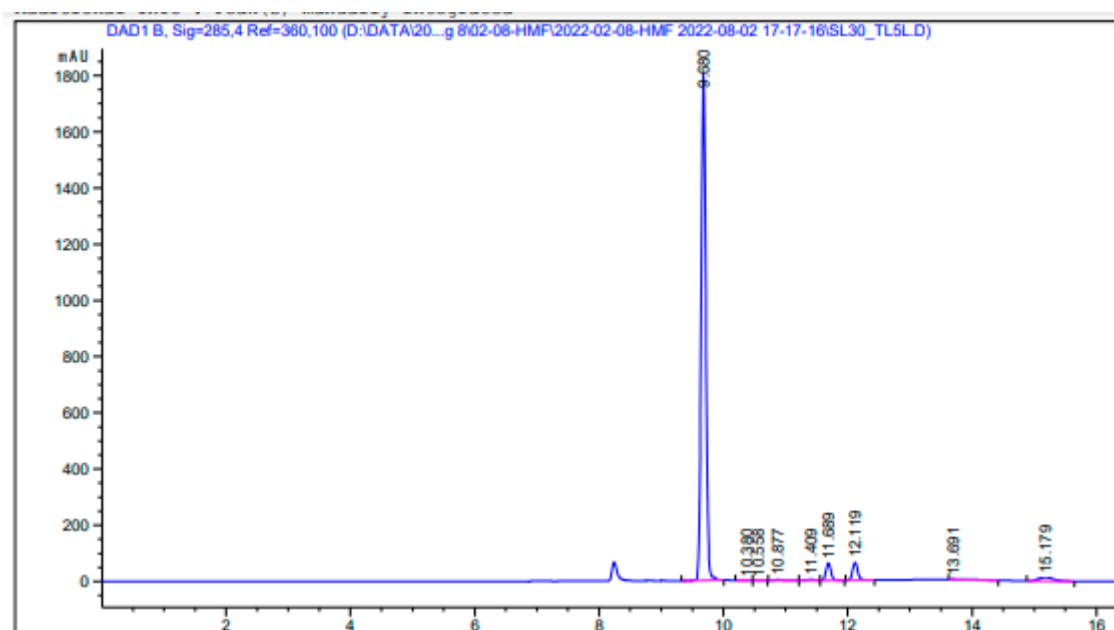

#### External Standard Report

Sorted By : Signal  
 Calib. Data Modified : 8/5/2022 1:49:08 AM  
 Multiplier : 1.0000  
 Dilution : 1.0000  
 Do not use Multiplier & Dilution Factor with ISTDs

Signal 1: DAD1 B, Sig=285,4 Ref=360,100

| RetTime<br>[min] | Type | Area<br>[mAU*s] | Amt/Area   | Amount<br>[ppm] | Grp | Name           |
|------------------|------|-----------------|------------|-----------------|-----|----------------|
| 8.900            | -    | -               | -          | -               | -   | Levulinic acid |
| 9.680            | VB R | 9406.10254      | 9.60704e-3 | 90.36479        |     | HMF            |
| 10.380           | BV   | 8.04894         | 5.05069e-2 | 4.06527e-1      |     | DFF            |
| 10.877           | BB   | 24.10202        | 0.00000    | 0.00000         |     | FDCA           |
| 11.409           | BV   | 25.91365        | 5.72768e-4 | 1.48425e-2      |     | Furfural       |

**Figure S4. 10:** HPLC chromatography of HMF. Reaction condition: Fructose (1 mmol), DES 2 (5 mmol), 100 °C, 60 min.

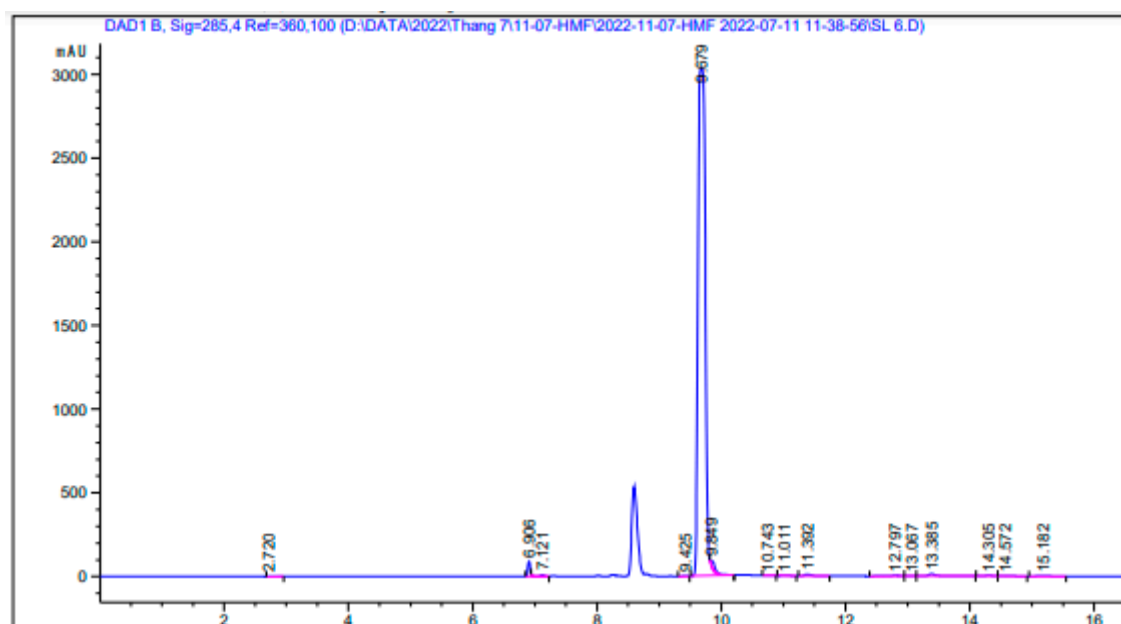

#### External Standard Report

Sorted By : Signal  
 Calib. Data Modified : 7/14/2022 9:11:36 AM  
 Multiplier : 1.0000  
 Dilution : 1.0000  
 Do not use Multiplier & Dilution Factor with ISTDs

Signal 1: DAD1 B, Sig=285,4 Ref=360,100

| RetTime<br>[min] | Type | Area<br>[mAU*s] | Amt/Area   | Amount<br>[ppm] | Grp | Name           |
|------------------|------|-----------------|------------|-----------------|-----|----------------|
| 8.770            | -    | -               | -          | -               | -   | Levulinic acid |
| 9.679            | BV R | 2.45316e4       | 1.06855e-2 | 262.13252       | -   | HMF            |
| 10.275           | -    | -               | -          | -               | -   | DFF            |
| 11.011           | BB   | 14.14764        | 1.74360e-1 | 2.46678         | -   | FDCA           |
| 11.392           | BB   | 63.87226        | 0.00000    | 0.00000         | -   | Furfural       |

**Figure S4. 11:** HPLC chromatography of HMF. Reaction condtion: Fructose (1 mmol), DES 3 (5 mmol), 100 °C, 5 min.



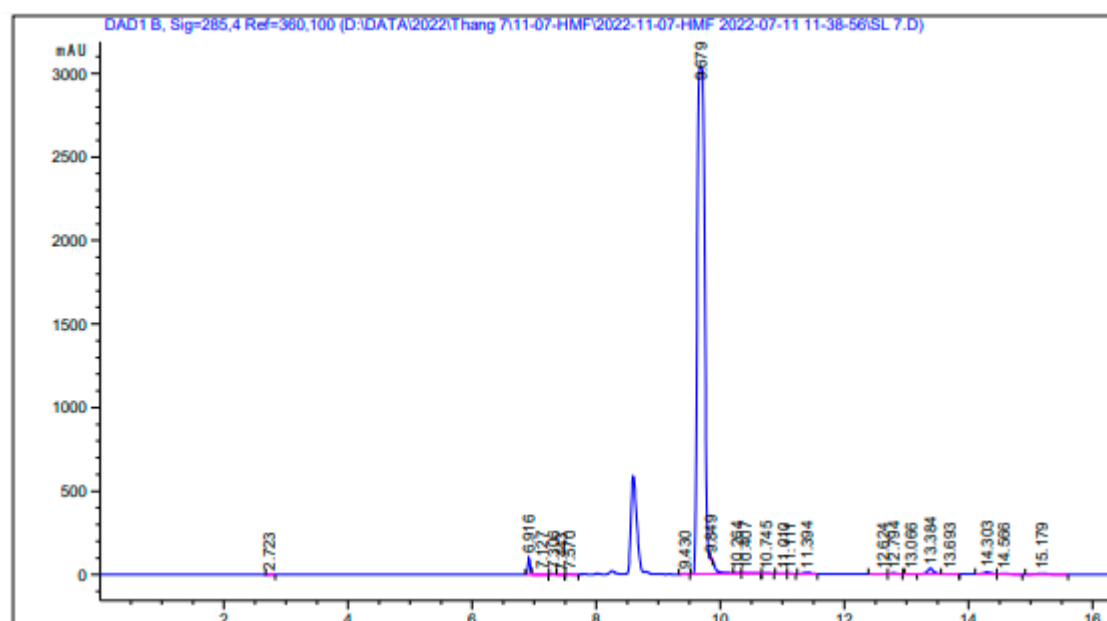

#### External Standard Report

Sorted By : Signal  
 Calib. Data Modified : 8/5/2022 1:49:08 AM  
 Multiplier : 1.0000  
 Dilution : 1.0000  
 Do not use Multiplier & Dilution Factor with ISTDs

Signal 1: DAD1 B, Sig=285,4 Ref=360,100

| RetTime<br>[min] | Type | Area<br>[mAU*s] | Amt/Area   | Amount<br>[ppm] | Grp | Name           |
|------------------|------|-----------------|------------|-----------------|-----|----------------|
| 8.900            | -    | -               | -          | -               | -   | Levulinic acid |
| 9.679            | BV R | 2.53973e4       | 9.63372e-3 | 244.67060       | -   | HMF            |
| 10.264           | VV X | 2.01953         | 1.70243e-1 | 3.43810e-1      | -   | DFF            |
| 11.111           | VB   | 9.48687         | 0.00000    | 0.00000         | -   | FDCA           |
| 11.394           | BB   | 57.81212        | 5.89325e-3 | 3.40701e-1      | -   | Furfural       |

**Figure S4. 12:** HPLC chromatography of HMF. Reaction condtion: Fructose (1 mmol), DES 3 (5 mmol), 100 °C, 10 min.

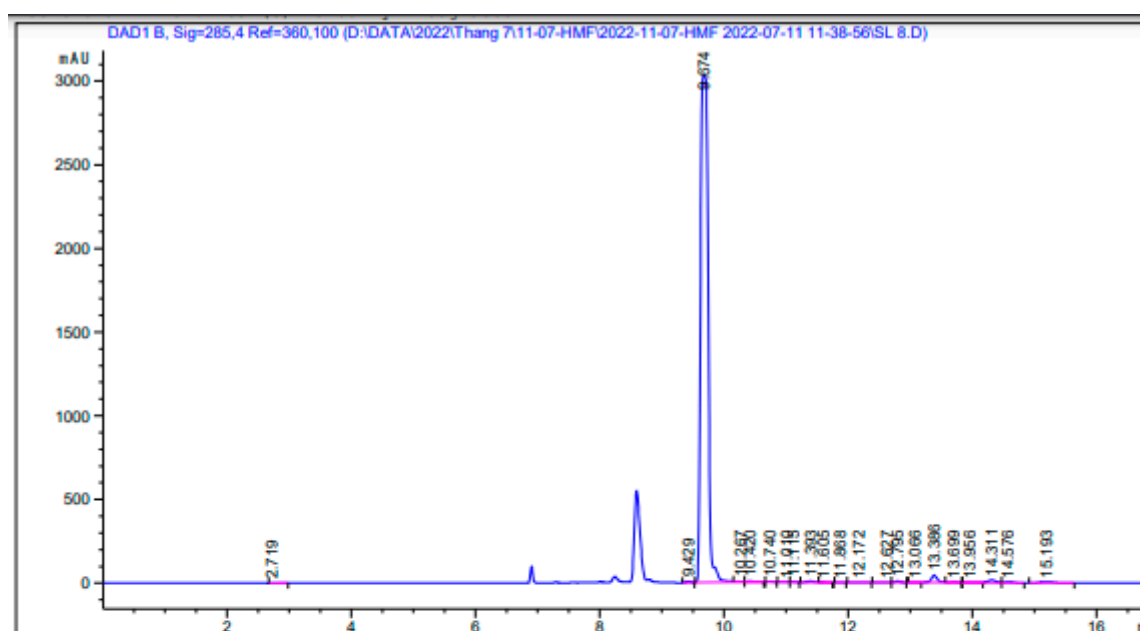

#### External Standard Report

Sorted By : Signal  
 Calib. Data Modified : 7/14/2022 9:11:36 AM  
 Multiplier : 1.0000  
 Dilution : 1.0000  
 Do not use Multiplier & Dilution Factor with ISTDs

Signal 1: DAD1 B, Sig=285,4 Ref=360,100

| RetTime<br>[min] | Type | Area<br>[mAU*s] | Amt/Area   | Amount<br>[ppm] | Grp | Name           |
|------------------|------|-----------------|------------|-----------------|-----|----------------|
| 8.770            | -    | -               | -          | -               |     | Levulinic acid |
| 9.674            | BV R | 2.54529e4       | 1.06825e-2 | 271.89968       |     | HMF            |
| 10.267           | VV E | 12.29513        | 2.64481e-1 | 3.25183         |     | DFF            |
| 11.010           | BV   | 10.09167        | 2.04753e-1 | 2.06630         |     | FDCA           |
| 11.393           | BV R | 56.76549        | 0.00000    | 0.00000         |     | Furfural       |

**Figure S4. 13:** HPLC chromatography of HMF. Reaction condition: Fructose (1 mmol), DES 3 (5 mmol), 100 °C, 20 min.

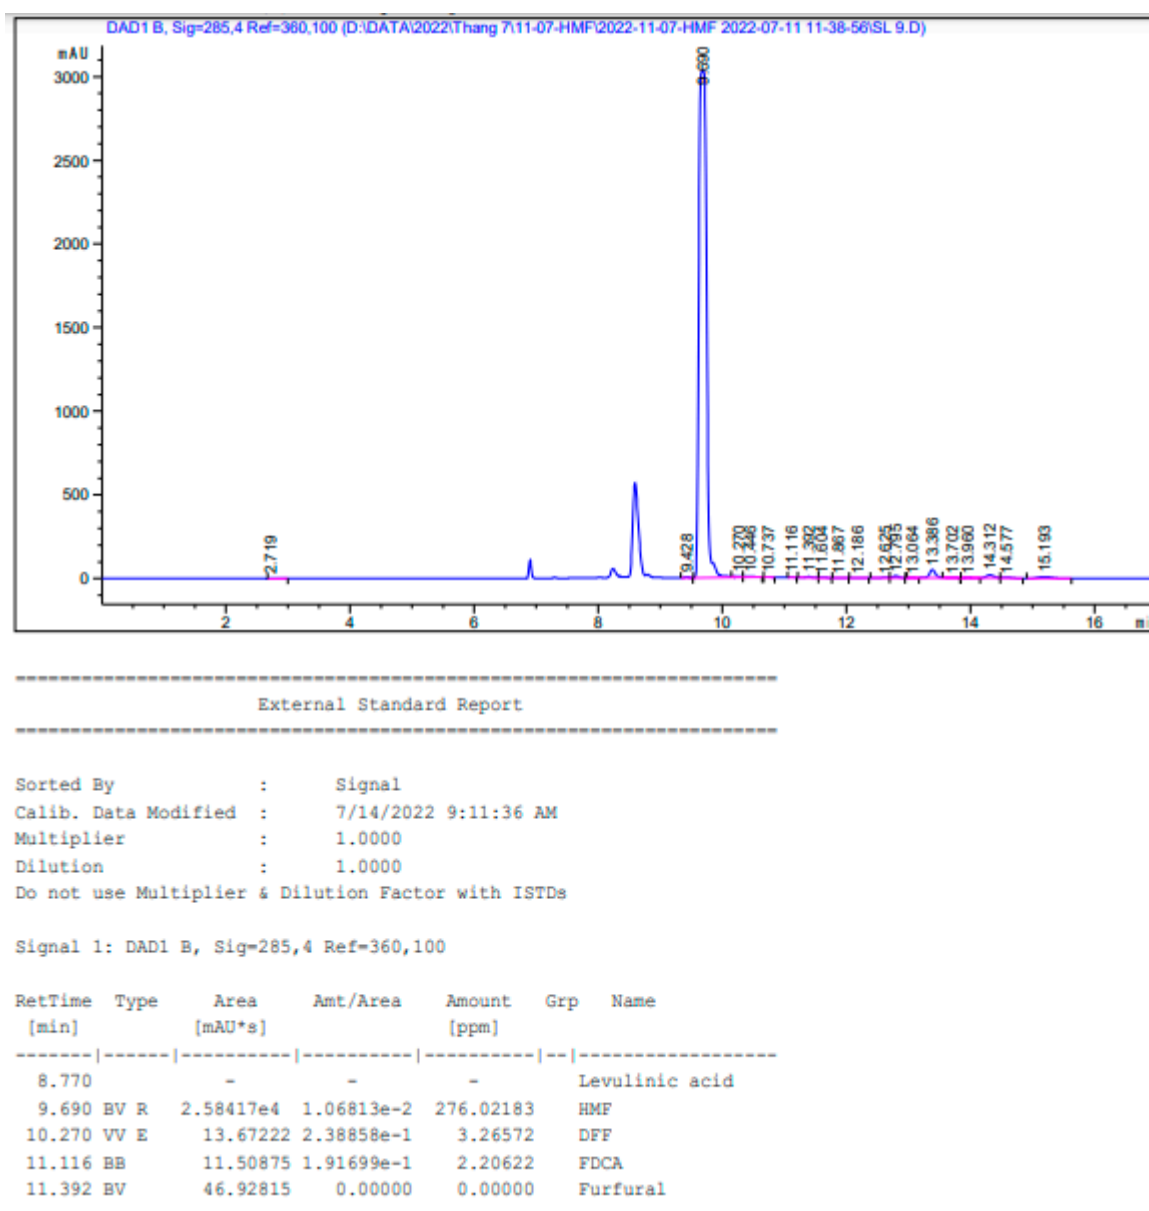

**Figure S4. 14:** HPLC chromatography of HMF. Reaction condition: Fructose (1 mmol), DES 3 (5 mmol), 100 °C, 30 min.

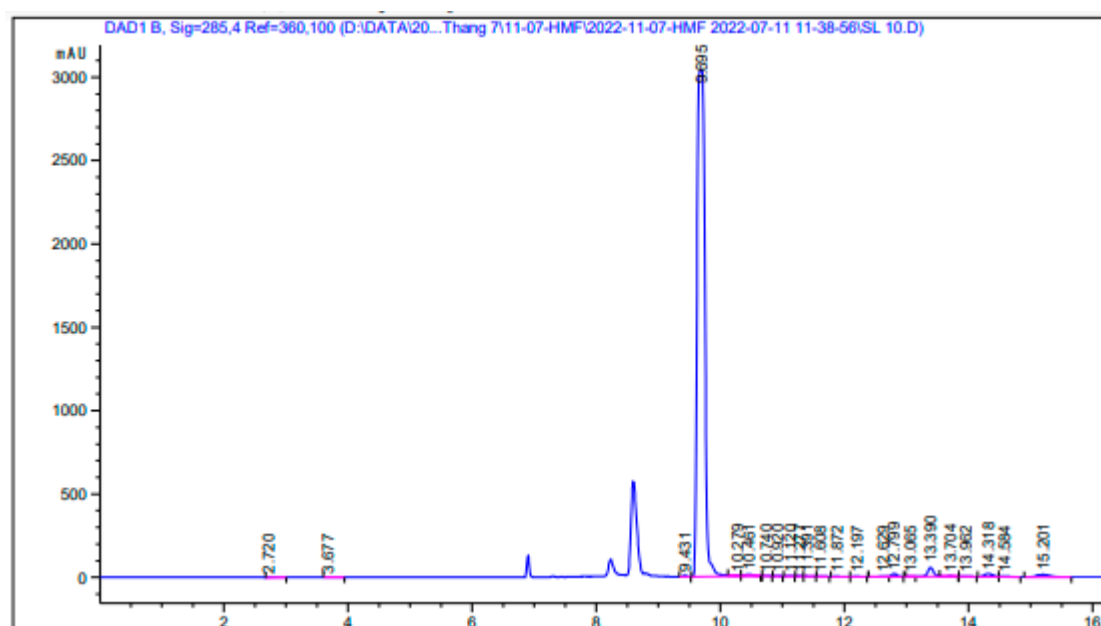

#### External Standard Report

Sorted By : Signal  
 Calib. Data Modified : 7/14/2022 9:11:36 AM  
 Multiplier : 1.0000  
 Dilution : 1.0000  
 Do not use Multiplier & Dilution Factor with ISTDs

Signal 1: DAD1 B, Sig=285,4 Ref=360,100

| RetTime<br>[min] | Type | Area<br>[mAU*s] | Amt/Area   | Amount<br>[ppm] | Grp | Name           |
|------------------|------|-----------------|------------|-----------------|-----|----------------|
| 8.770            | -    | -               | -          | -               | -   | Levulinic acid |
| 9.695            | BV R | 2.60188e4       | 1.06807e-2 | 277.90030       |     | HMF            |
| 10.279           | VV E | 19.25565        | 1.72523e-1 | 3.32204         |     | DFF            |
| 10.920           | BB   | 5.08497         | 3.09133e-1 | 1.57193         |     | FDCA           |
| 11.277           | BV   | 10.84214        | 0.00000    | 0.00000         |     | Furfural       |

**Figure S4. 15:** HPLC chromatography of HMF. Reaction condtion: Fructose (1 mmol), DES 3 (5 mmol), 100 °C, 60 min.

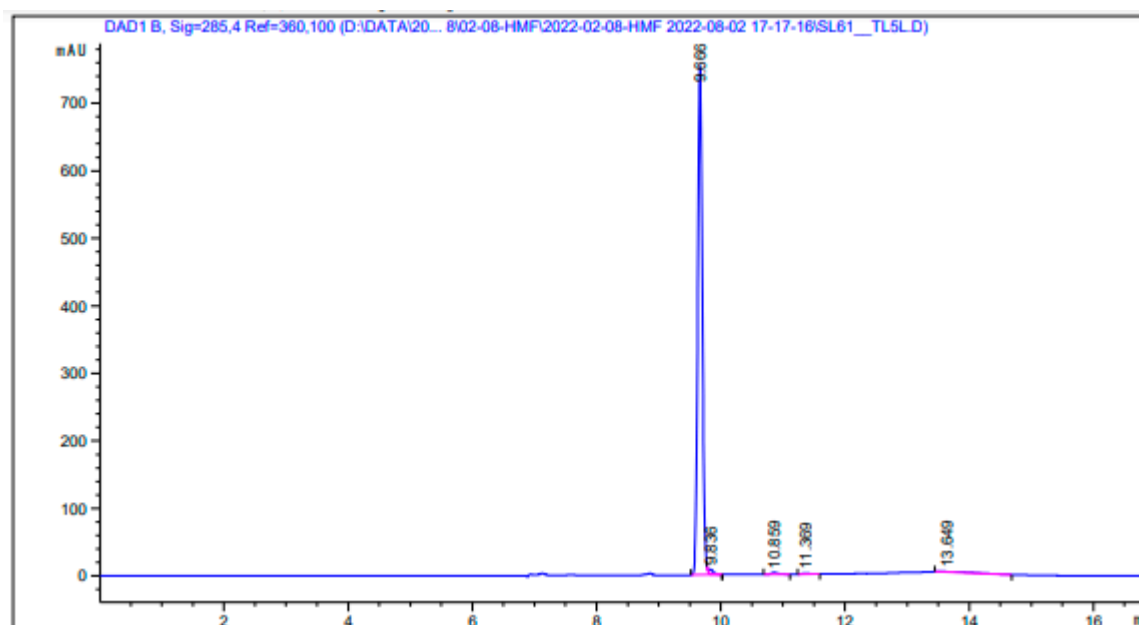

External Standard Report

Sorted By : Signal  
 Calib. Data Modified : 8/5/2022 1:06:36 AM  
 Multiplier : 1.0000  
 Dilution : 1.0000  
 Do not use Multiplier & Dilution Factor with ISTDs

Signal 1: DAD1 B, Sig=285,4 Ref=360,100

| RetTime<br>[min] | Type | Area<br>[mAU*s] | Amt/Area   | Amount<br>[ppm] | Grp | Name           |
|------------------|------|-----------------|------------|-----------------|-----|----------------|
| 8.900            | -    | -               | -          | -               | -   | Levulinic acid |
| 9.666            | BV R | 3906.31519      | 9.54739e-3 | 37.29510        | -   | HMF            |
| 10.501           | -    | -               | -          | -               | -   | DFF            |
| 10.859           | BB   | 21.06435        | 0.00000    | 0.00000         | -   | FDCA           |
| 11.369           | BB   | 10.89429        | 0.00000    | 0.00000         | -   | Furfural       |

**Figure S4. 16:** HPLC chromatography of HMF. Reaction condtion: Fructose (1 mmol), DES 4 (5 mmol), 100 °C, 5 min.

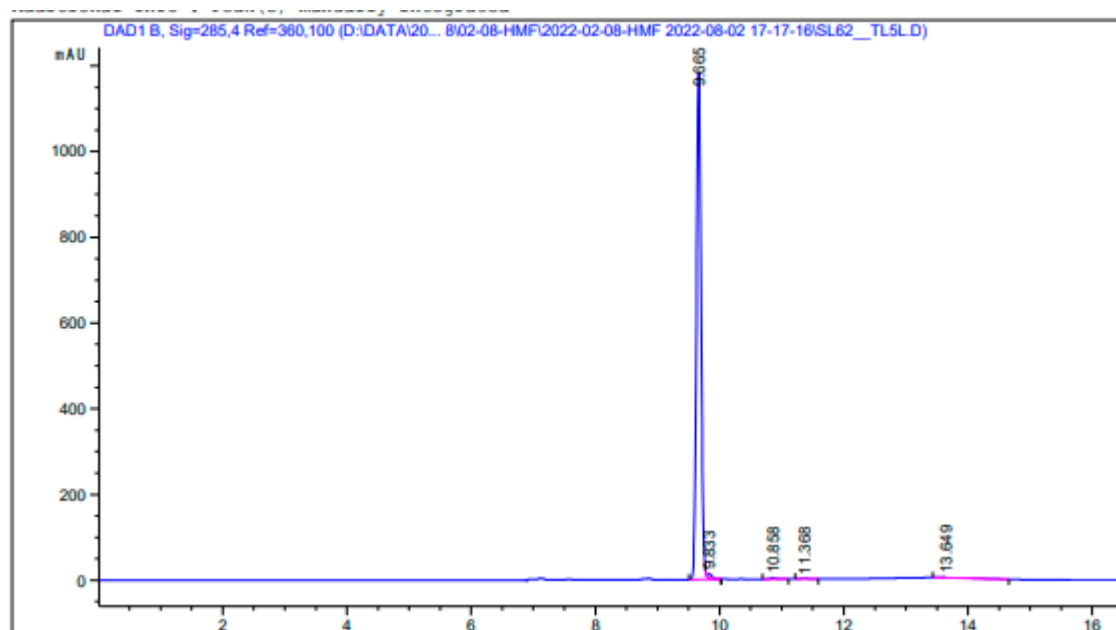

External Standard Report

Sorted By : Signal  
 Calib. Data Modified : 8/5/2022 1:06:36 AM  
 Multiplier : 1.0000  
 Dilution : 1.0000  
 Do not use Multiplier & Dilution Factor with ISTDs

Signal 1: DAD1 B, Sig=285,4 Ref=360,100

| RetTime<br>[min] | Type | Area<br>[mAU*s] | Amt/Area   | Amount<br>[ppm] | Grp | Name           |
|------------------|------|-----------------|------------|-----------------|-----|----------------|
| 8.900            | -    | -               | -          | -               | -   | Levulinic acid |
| 9.665            | BV R | 6134.12354      | 9.58444e-3 | 58.79213        | -   | HMF            |
| 10.501           | -    | -               | -          | -               | -   | DFF            |
| 10.858           | BB   | 21.17272        | 0.00000    | 0.00000         | -   | FDCA           |
| 11.368           | BB   | 13.81054        | 0.00000    | 0.00000         | -   | Furfural       |

**Figure S4. 17:** HPLC chromatography of HMF. Reaction condition: Fructose (1 mmol), DES 4 (5 mmol), 100 °C, 10 min.

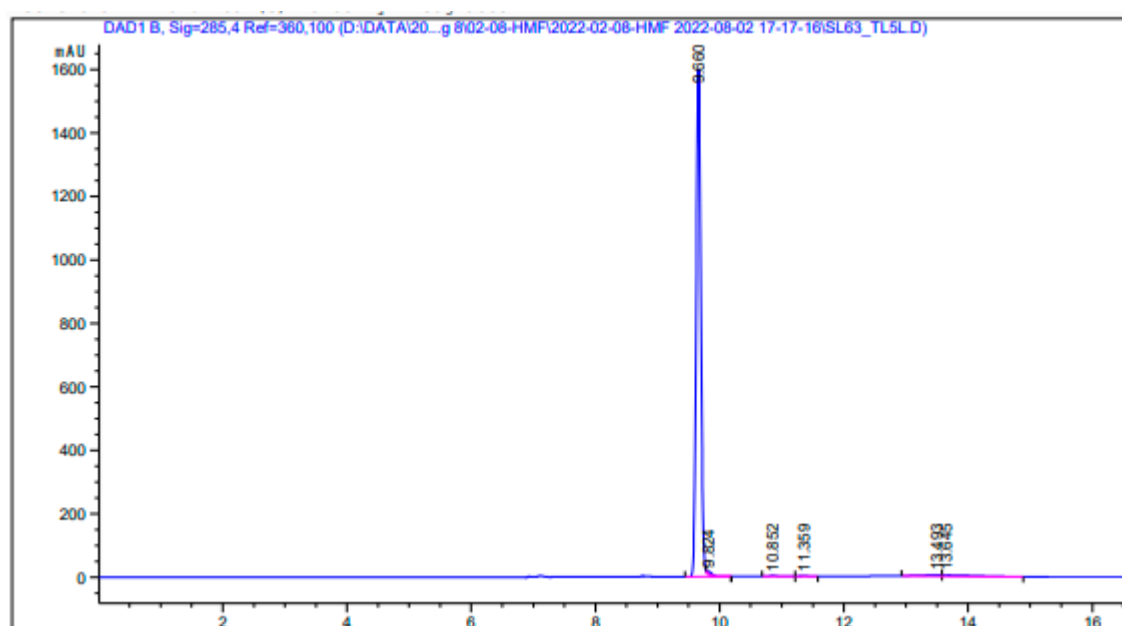

External Standard Report

Sorted By : Signal  
 Calib. Data Modified : 8/5/2022 1:06:36 AM  
 Multiplier : 1.0000  
 Dilution : 1.0000  
 Do not use Multiplier & Dilution Factor with ISTDs

Signal 1: DAD1 B, Sig=285,4 Ref=360,100

| RetTime<br>[min] | Type | Area<br>[mAU*s] | Amt/Area   | Amount<br>[ppm] | Grp | Name           |
|------------------|------|-----------------|------------|-----------------|-----|----------------|
| 8.900            |      | -               | -          | -               |     | Levulinic acid |
| 9.660            | BV R | 8373.49219      | 9.60181e-3 | 80.40071        |     | HMF            |
| 10.501           |      | -               | -          | -               |     | DFF            |
| 10.852           | BV   | 25.84713        | 0.00000    | 0.00000         |     | FDCA           |
| 11.359           | VB   | 15.41716        | 0.00000    | 0.00000         |     | Furfural       |

**Figure S4. 18:** HPLC chromatography of HMF. Reaction condtion: Fructose (1 mmol), DES 4 (5 mmol), 100 °C, 20 min.

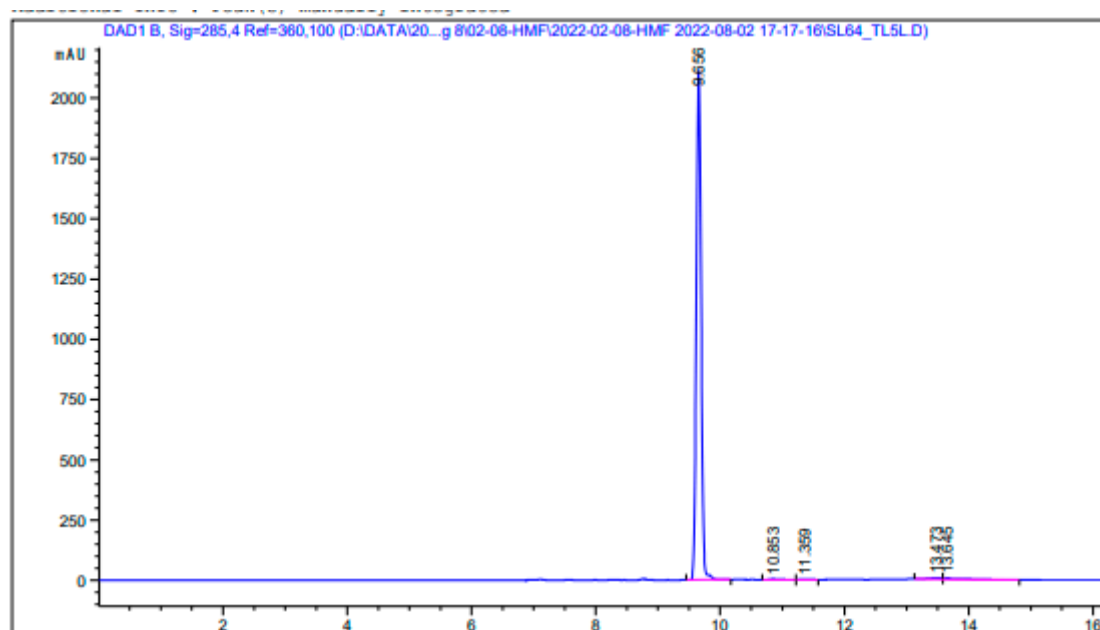

#### External Standard Report

Sorted By : Signal  
 Calib. Data Modified : 8/5/2022 1:06:36 AM  
 Multiplier : 1.0000  
 Dilution : 1.0000  
 Do not use Multiplier & Dilution Factor with ISTDs

Signal 1: DAD1 B, Sig=285,4 Ref=360,100

| RetTime<br>[min] | Type | Area<br>[mAU*s] | Amt/Area   | Amount<br>[ppm] | Grp | Name           |
|------------------|------|-----------------|------------|-----------------|-----|----------------|
| 8.900            | -    | -               | -          | -               | -   | Levulinic acid |
| 9.656            | BB   | 1.12705e4       | 9.61405e-3 | 108.35468       | -   | HMF            |
| 10.501           | -    | -               | -          | -               | -   | DFF            |
| 10.853           | BV   | 25.21981        | 0.00000    | 0.00000         | -   | FDCA           |
| 11.359           | VB   | 13.95730        | 0.00000    | 0.00000         | -   | Furfural       |

**Figure S4. 19:** HPLC chromatography of HMF. Reaction condition: Fructose (1 mmol), DES 4 (5 mmol), 100 °C, 30 min.



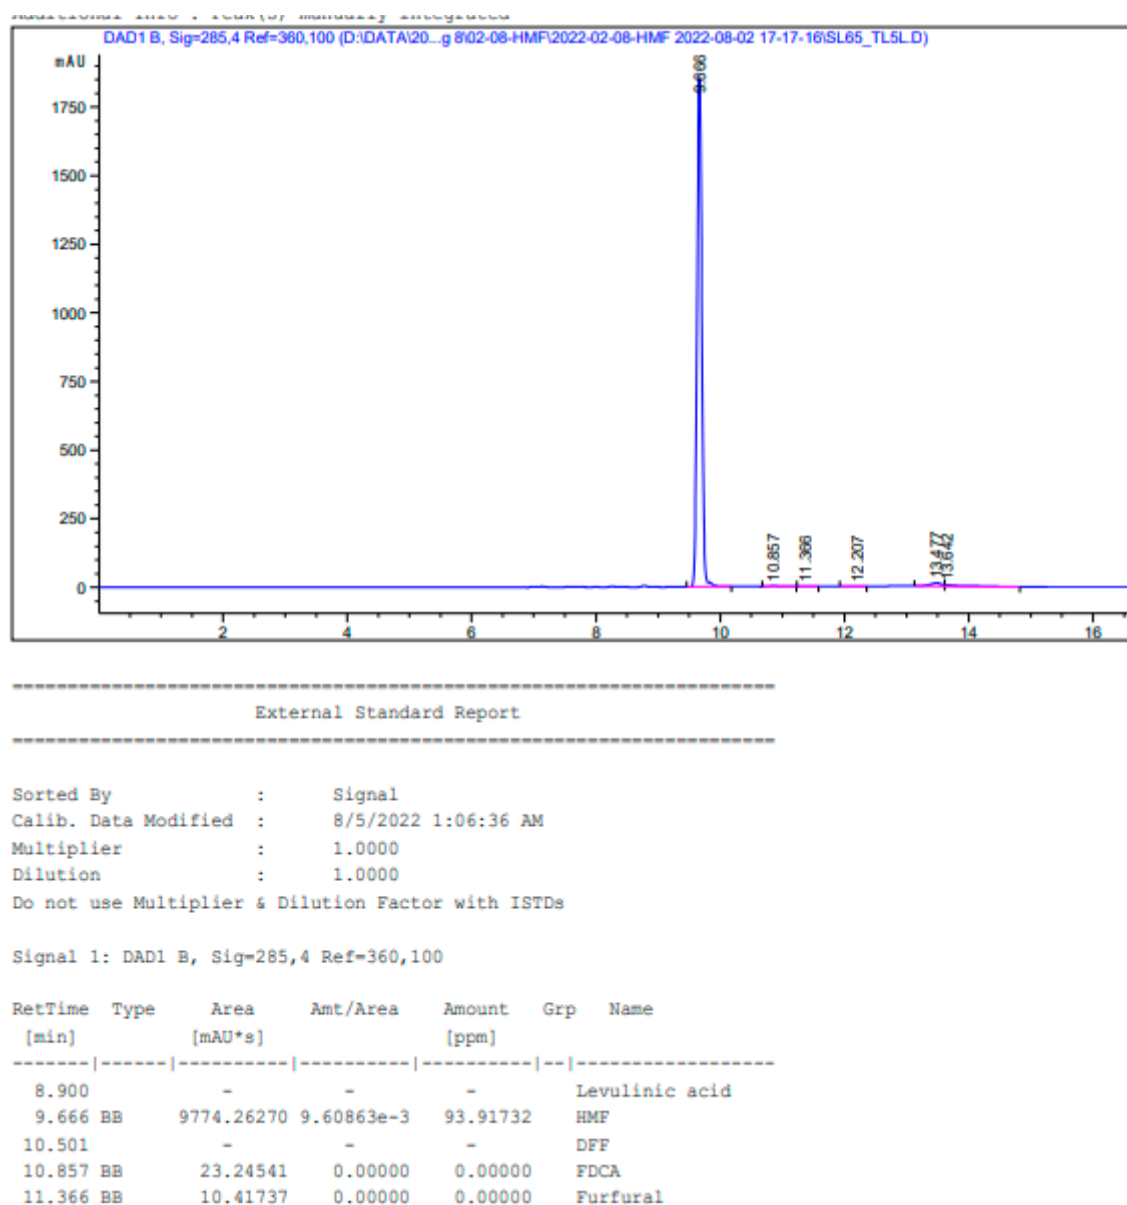

**Figure S4. 20:** HPLC chromatography of HMF. Reaction condition: Fructose (1 mmol), DES 4 (5 mmol), 100 °C, 60 min.

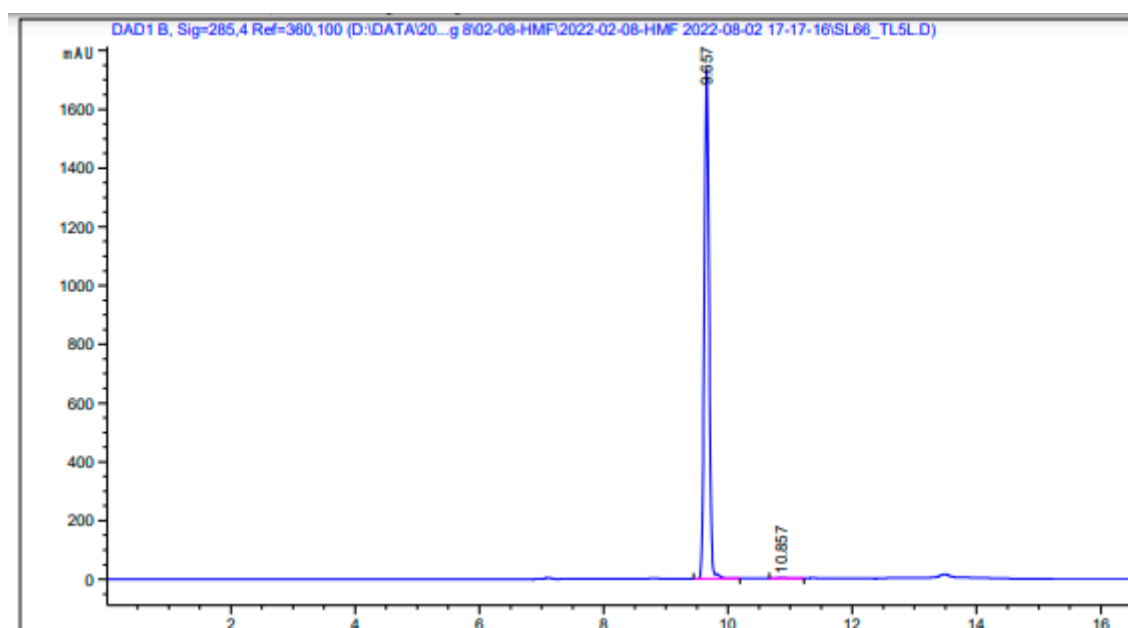

External Standard Report

Sorted By : Signal  
Calib. Data Modified : 8/5/2022 1:06:36 AM  
Multiplier : 1.0000  
Dilution : 1.0000  
Do not use Multiplier & Dilution Factor with ISTDs

Signal 1: DAD1 B, Sig=285,4 Ref=360,100

| RetTime<br>[min] | Type | Area<br>[mAU*s] | Amt/Area   | Amount<br>[ppm] | Grp | Name           |
|------------------|------|-----------------|------------|-----------------|-----|----------------|
| 8.900            | -    | -               | -          | -               | -   | Levulinic acid |
| 9.657            | BB   | 9150.45801      | 9.60586e-3 | 87.89798        | -   | HMF            |
| 10.501           | -    | -               | -          | -               | -   | DFF            |
| 10.857           | BB   | 22.54233        | 0.00000    | 0.00000         | -   | FDCA           |
| 11.300           | -    | -               | -          | -               | -   | Furfural       |

**Figure S4. 21.** HPLC chromatography of HMF. Reaction condtion: Fructose (1 mmol), DES 5 (5 mmol), 100 °C, 5 min.

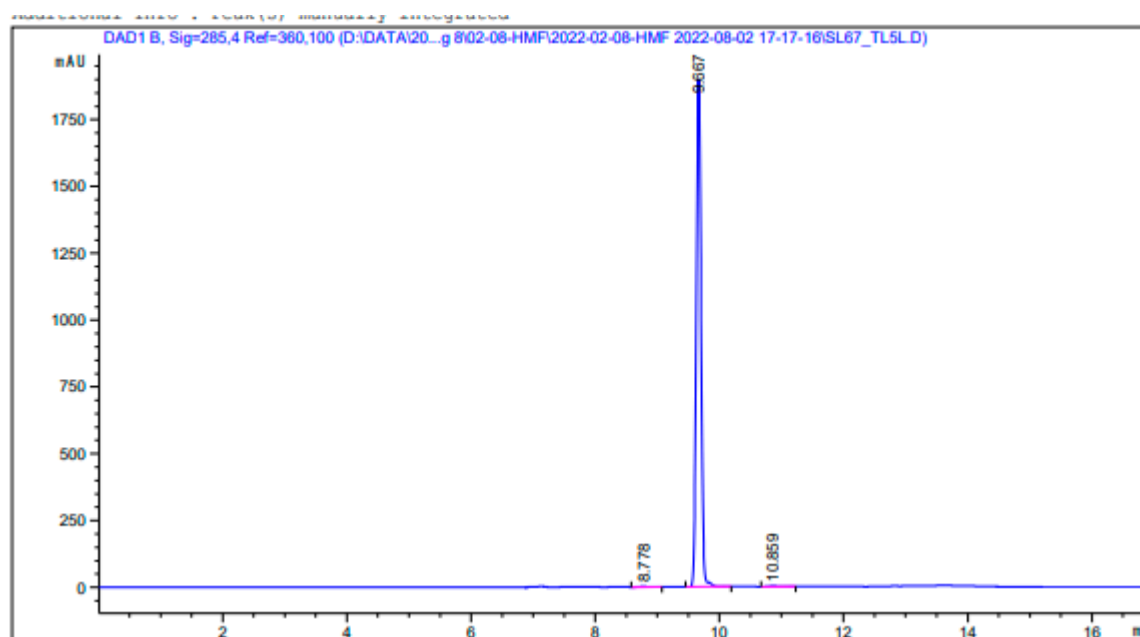

#### External Standard Report

Sorted By : Signal  
 Calib. Data Modified : 8/5/2022 1:06:36 AM  
 Multiplier : 1.0000  
 Dilution : 1.0000  
 Do not use Multiplier & Dilution Factor with ISTDs

Signal 1: DAD1 B, Sig=285,4 Ref=360,100

| RetTime<br>[min] | Type | Area<br>[mAU*s] | Amt/Area   | Amount<br>[ppm] | Grp | Name           |
|------------------|------|-----------------|------------|-----------------|-----|----------------|
| 8.778            | BB   | 23.10656        | 19.27242   | 445.31937       |     | Levulinic acid |
| 9.667            | BB   | 1.00511e4       | 9.60976e-3 | 96.58897        |     | HMF            |
| 10.501           |      | -               | -          | -               |     | DFF            |
| 10.859           | BV   | 25.13309        | 0.00000    | 0.00000         |     | FDCA           |
| 11.300           |      | -               | -          | -               |     | Furfural       |

**Figure S4. 22:** HPLC chromatography of HMF. Reaction condtion: Fructose (1 mmol), DES 5 (5 mmol), 100 °C, 10 min.

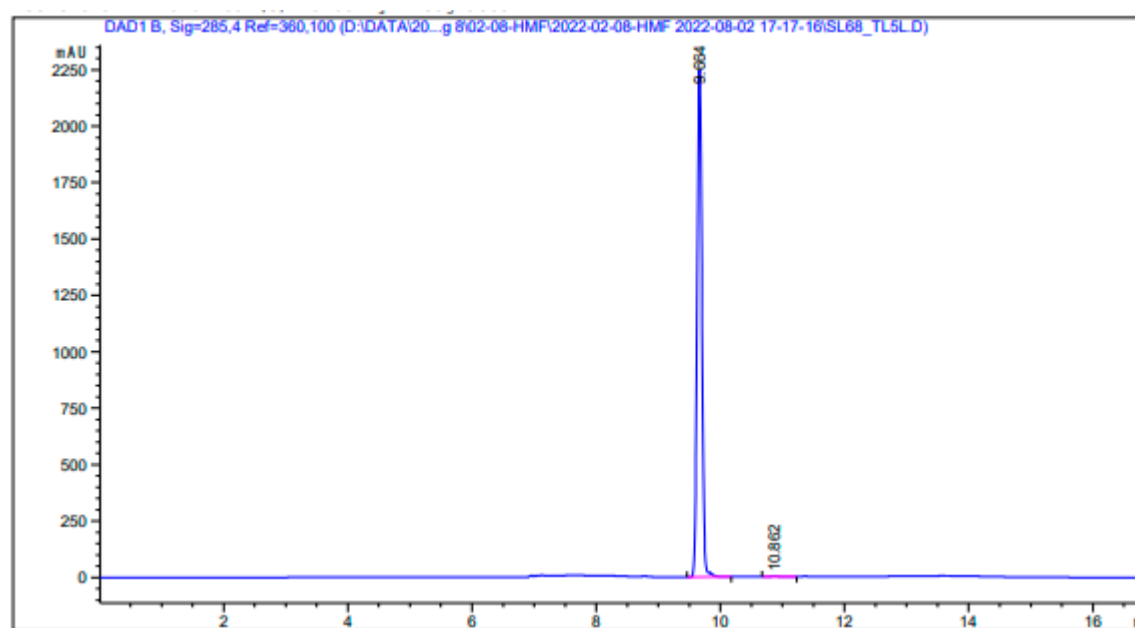

External Standard Report

Sorted By : Signal  
 Calib. Data Modified : 8/5/2022 1:06:36 AM  
 Multiplier : 1.0000  
 Dilution : 1.0000  
 Do not use Multiplier & Dilution Factor with ISTDs

Signal 1: DAD1 B, Sig=285,4 Ref=360,100

| RetTime<br>[min] | Type | Area<br>[mAU*s] | Amt/Area   | Amount<br>[ppm] | Grp | Name           |
|------------------|------|-----------------|------------|-----------------|-----|----------------|
| 8.900            | -    | -               | -          | -               | -   | Levulinic acid |
| 9.664            | BB   | 1.20256e4       | 9.61627e-3 | 115.64122       | -   | HMF            |
| 10.501           | -    | -               | -          | -               | -   | DFF            |
| 10.862           | BB   | 24.84221        | 0.00000    | 0.00000         | -   | FDCA           |
| 11.300           | -    | -               | -          | -               | -   | Furfural       |

**Figure S4. 23:** HPLC chromatography of HMF. Reaction condtion: Fructose (1 mmol), DES 5 (5 mmol), 100 °C, 20 min.

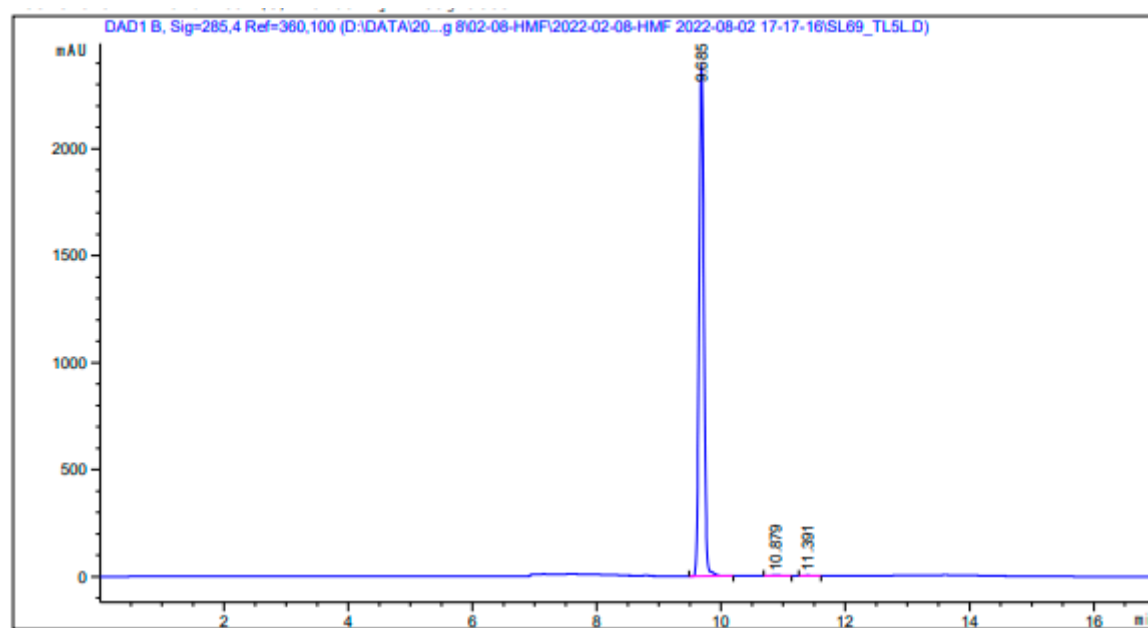

External Standard Report

Sorted By : Signal  
 Calib. Data Modified : 8/5/2022 1:06:36 AM  
 Multiplier : 1.0000  
 Dilution : 1.0000  
 Do not use Multiplier & Dilution Factor with ISTDs

Signal 1: DAD1 B, Sig=285,4 Ref=360,100

| RetTime<br>[min] | Type | Area<br>[mAU*s] | Amt/Area   | Amount<br>[ppm] | Grp | Name           |
|------------------|------|-----------------|------------|-----------------|-----|----------------|
| 8.900            | -    | -               | -          | -               | -   | Levulinic acid |
| 9.685            | BB   | 1.28581e4       | 9.61841e-3 | 123.67452       | -   | HMF            |
| 10.501           | -    | -               | -          | -               | -   | DFF            |
| 10.879           | BB   | 23.64330        | 0.00000    | 0.00000         | -   | FDCA           |
| 11.391           | BB   | 14.25451        | 0.00000    | 0.00000         | -   | Furfural       |

**Figure S4. 24.** HPLC chromatography of HMF. Reaction condtion: Fructose (1 mmol), DES 5 (5 mmol), 100 °C, 30 min.

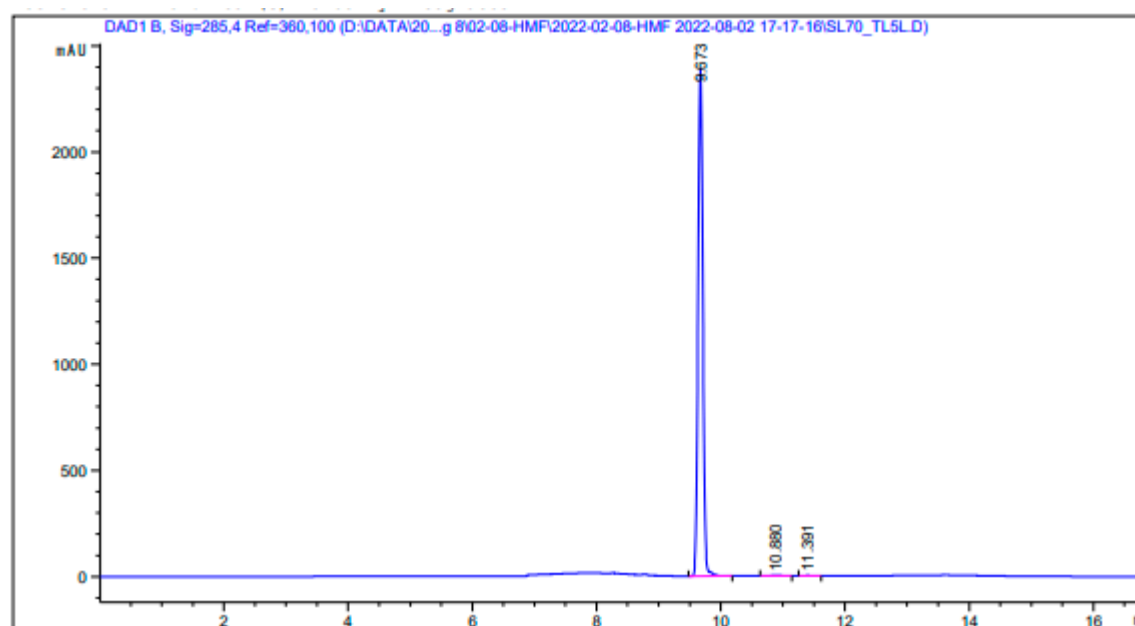

External Standard Report

Sorted By : Signal  
 Calib. Data Modified : 8/5/2022 1:06:36 AM  
 Multiplier : 1.0000  
 Dilution : 1.0000  
 Do not use Multiplier & Dilution Factor with ISTDs

Signal 1: DAD1 B, Sig=285,4 Ref=360,100

| RetTime<br>[min] | Type | Area<br>[mAU*s] | Amt/Area   | Amount<br>[ppm] | Grp | Name           |
|------------------|------|-----------------|------------|-----------------|-----|----------------|
| 8.900            | -    | -               | -          | -               | -   | Levulinic acid |
| 9.673            | BB   | 1.29810e4       | 9.61871e-3 | 124.86015       | -   | HMF            |
| 10.501           | -    | -               | -          | -               | -   | DFF            |
| 10.880           | BB   | 34.59396        | 0.00000    | 0.00000         | -   | FDCA           |
| 11.391           | BB   | 13.26276        | 0.00000    | 0.00000         | -   | Furfural       |

**Figure S4. 25:** HPLC chromatography of HMF. Reaction condtion: Fructose (1 mmol), DES 5 (5 mmol), 100 °C, 60 min.

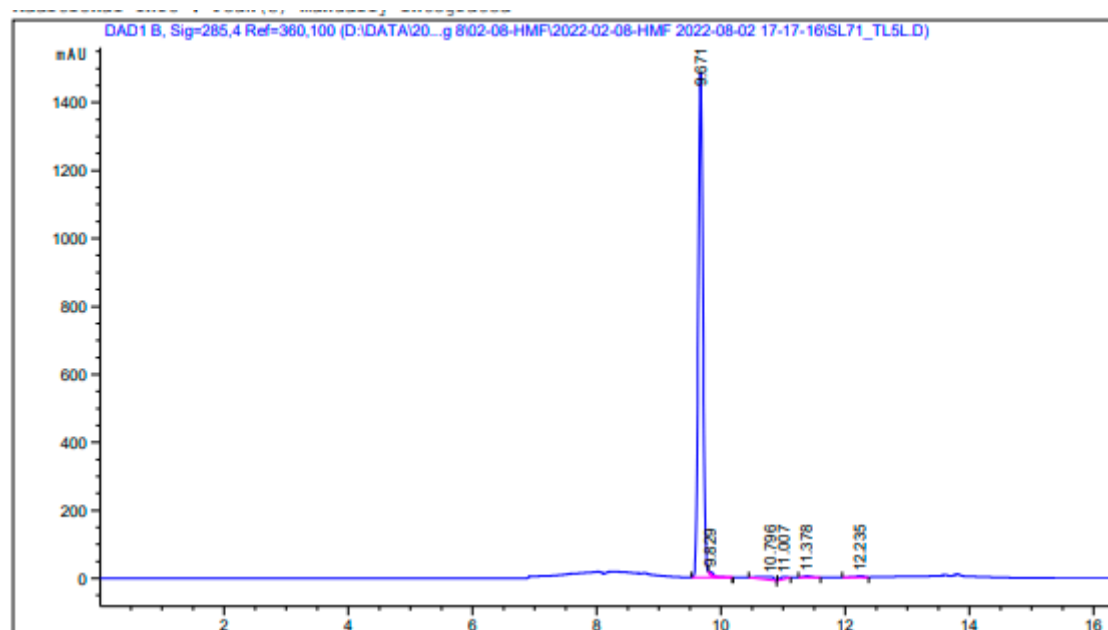

#### External Standard Report

Sorted By : Signal  
 Calib. Data Modified : 8/5/2022 1:06:36 AM  
 Multiplier : 1.0000  
 Dilution : 1.0000  
 Do not use Multiplier & Dilution Factor with ISTDs

Signal 1: DAD1 B, Sig=285,4 Ref=360,100

| RetTime<br>[min] | Type | Area<br>[mAU*s] | Amt/Area   | Amount<br>[ppm] | Grp | Name           |
|------------------|------|-----------------|------------|-----------------|-----|----------------|
| 8.900            | -    | -               | -          | -               | -   | Levulinic acid |
| 9.671            | BV R | 7788.48291      | 9.59824e-3 | 74.75572        | -   | HMF            |
| 10.501           | -    | -               | -          | -               | -   | DFF            |
| 11.007           | BB   | 47.10159        | 0.00000    | 0.00000         | -   | FDCA           |
| 11.378           | BB   | 23.25702        | 0.00000    | 0.00000         | -   | Furfural       |

**Figure S4. 26.** HPLC chromatography of HMF. Reaction condtion: Fructose (1 mmol), DES 6 (5 mmol), 100 °C, 5 min.





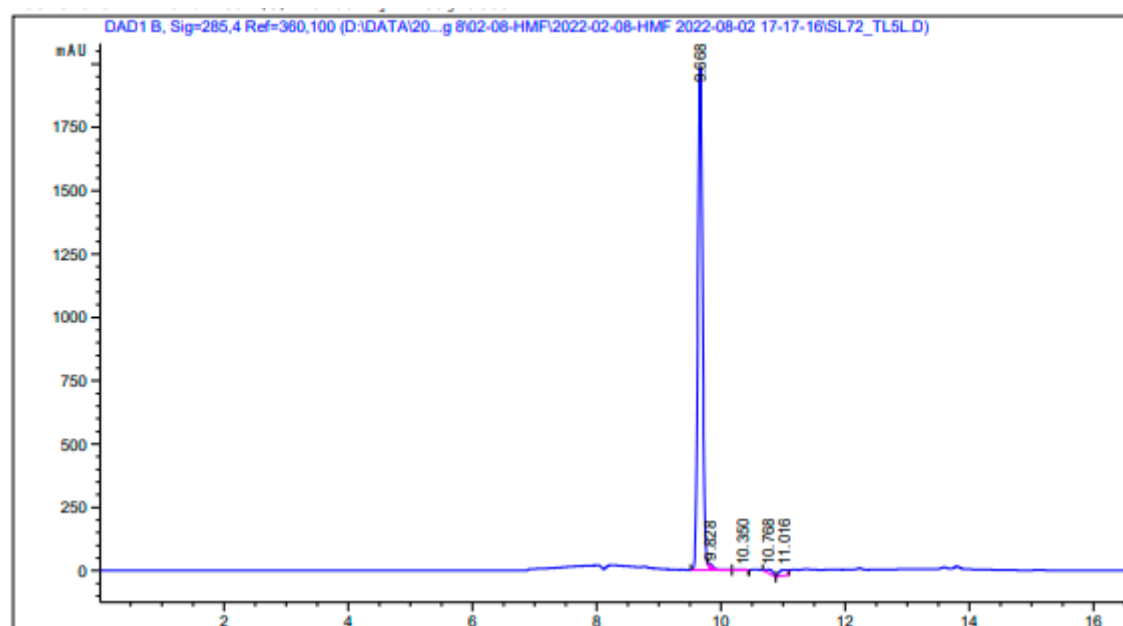

#### External Standard Report

Sorted By : Signal  
 Calib. Data Modified : 8/5/2022 1:06:36 AM  
 Multiplier : 1.0000  
 Dilution : 1.0000  
 Do not use Multiplier & Dilution Factor with ISTDs

Signal 1: DAD1 B, Sig=285,4 Ref=360,100

| RetTime<br>[min] | Type | Area<br>[mAU*s] | Amt/Area   | Amount<br>[ppm] | Grp | Name           |
|------------------|------|-----------------|------------|-----------------|-----|----------------|
| 8.900            | -    | -               | -          | -               | -   | Levulinic acid |
| 9.668            | BV R | 1.04631e4       | 9.61132e-3 | 100.56388       | -   | HMF            |
| 10.350           | VB E | 7.35093         | 5.43150e-2 | 3.99266e-1      | -   | DFF            |
| 11.016           | BV   | 210.33058       | 7.56799e-2 | 15.91780        | -   | FDCA           |
| 11.300           | -    | -               | -          | -               | -   | Furfural       |

**Figure S4. 27:** HPLC chromatography of HMF. Reaction condtion: Fructose (1 mmol), DES 6 (5 mmol), 100 °C, 10 min.

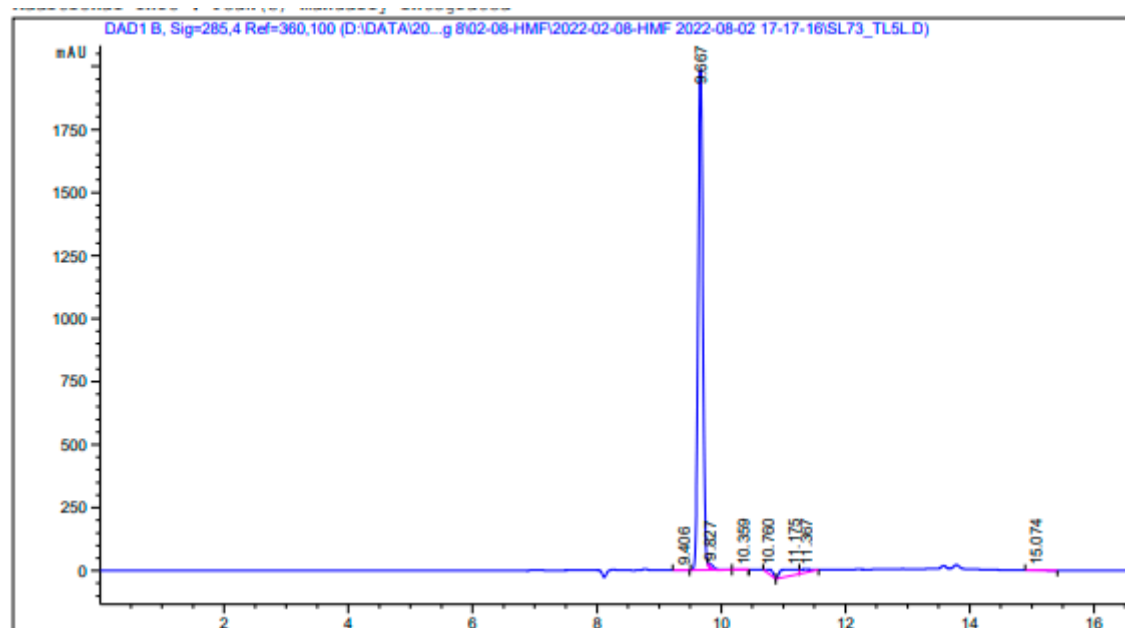

#### External Standard Report

Sorted By : Signal  
 Calib. Data Modified : 8/5/2022 1:06:36 AM  
 Multiplier : 1.0000  
 Dilution : 1.0000  
 Do not use Multiplier & Dilution Factor with ISTDs

Signal 1: DAD1 B, Sig=285,4 Ref=360,100

| RetTime<br>[min] | Type | Area<br>[mAU*s] | Amt/Area   | Amount<br>[ppm] | Grp | Name           |
|------------------|------|-----------------|------------|-----------------|-----|----------------|
| 8.900            | -    | -               | -          | -               | -   | Levulinic acid |
| 9.667            | BV R | 1.03970e4       | 9.61108e-3 | 99.92665        | -   | HMF            |
| 10.359           | VB E | 8.28941         | 4.93434e-2 | 4.09028e-1      | -   | DFF            |
| 11.175           | BV   | 492.47964       | 1.30781e-1 | 64.40692        | -   | FDCA           |
| 11.367           | VB   | 164.02460       | 8.69208e-3 | 1.42571         | -   | Furfural       |

**Figure S4. 28.** HPLC chromatography of HMF. Reaction condition: Fructose (1 mmol), DES 5 (5 mmol), 100 °C, 20 min.

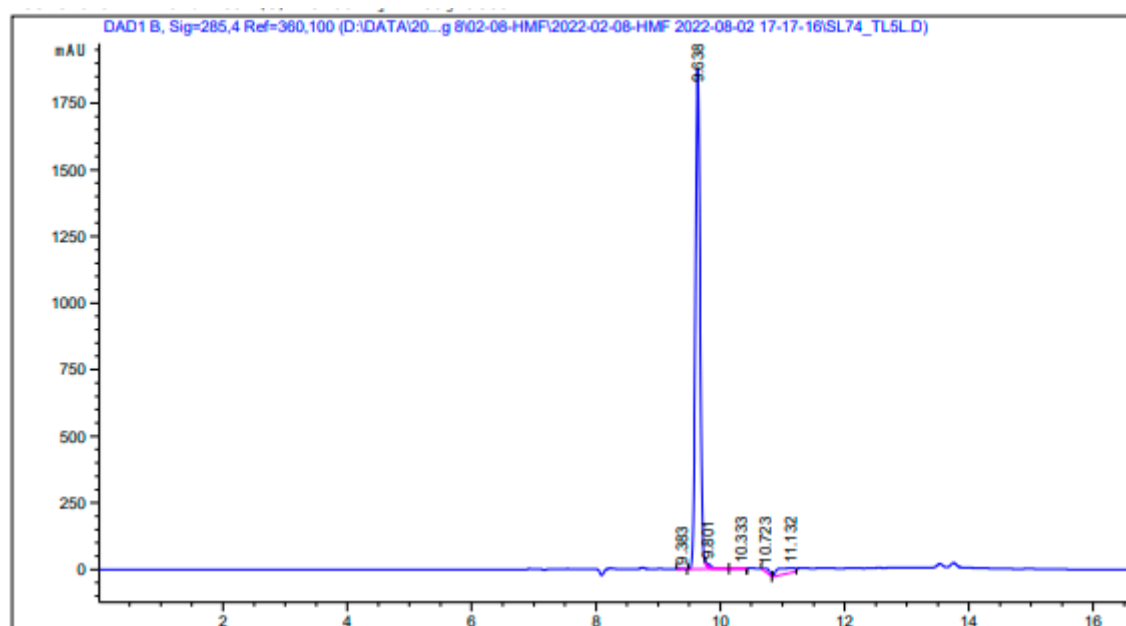

#### External Standard Report

Sorted By : Signal  
 Calib. Data Modified : 8/5/2022 1:06:36 AM  
 Multiplier : 1.0000  
 Dilution : 1.0000  
 Do not use Multiplier & Dilution Factor with ISTDs

Signal 1: DAD1 B, Sig=285,4 Ref=360,100

| RetTime<br>[min] | Type | Area<br>[mAU*s] | Amt/Area   | Amount<br>[ppm] | Grp | Name           |
|------------------|------|-----------------|------------|-----------------|-----|----------------|
| 8.900            | -    | -               | -          | -               | -   | Levulinic acid |
| 9.638            | BV R | 9790.12500      | 9.60870e-3 | 94.07038        | -   | HMF            |
| 10.333           | VB E | 9.75259         | 4.35011e-2 | 4.24248e-1      | -   | DFF            |
| 11.132           | BV   | 408.80066       | 1.22373e-1 | 50.02615        | -   | FDCA           |
| 11.300           | -    | -               | -          | -               | -   | Furfural       |

**Figure S4. 29:** HPLC chromatography of HMF. Reaction condtion: Fructose (1 mmol), DES 6 (5 mmol), 100 °C, 30 min.

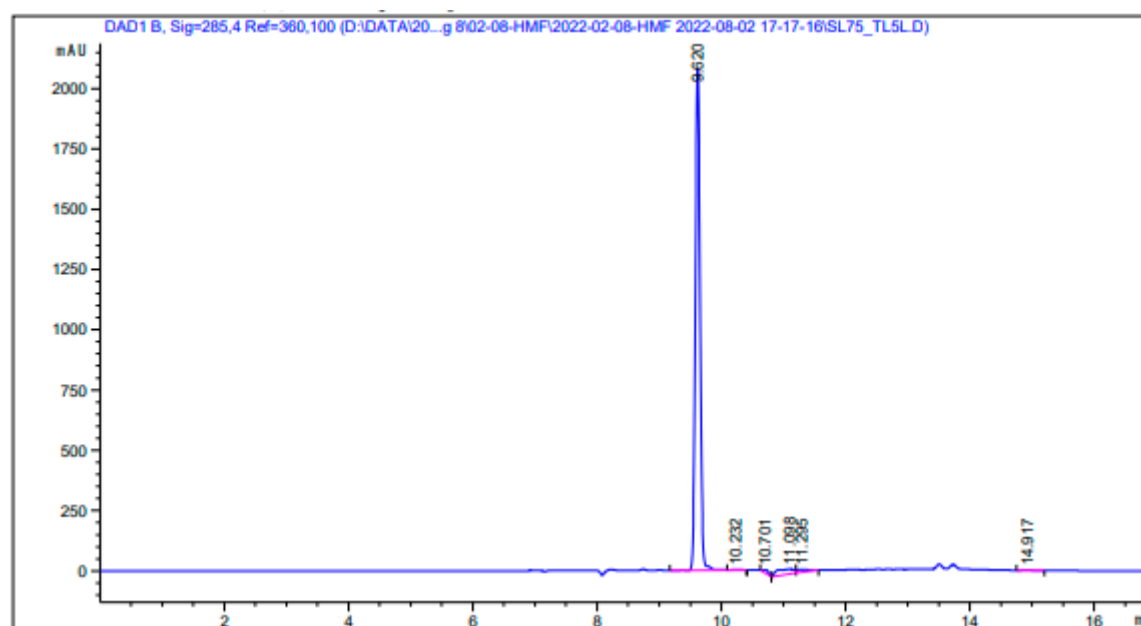

#### External Standard Report

Sorted By : Signal  
 Calib. Data Modified : 8/5/2022 1:06:36 AM  
 Multiplier : 1.0000  
 Dilution : 1.0000  
 Do not use Multiplier & Dilution Factor with ISTDs

Signal 1: DAD1 B, Sig=285,4 Ref=360,100

| RetTime<br>[min] | Type | Area<br>[mAU*s] | Amt/Area   | Amount<br>[ppm] | Grp | Name           |
|------------------|------|-----------------|------------|-----------------|-----|----------------|
| 8.900            | -    | -               | -          | -               | -   | Levulinic acid |
| 9.620            | VV R | 1.09698e4       | 9.61308e-3 | 105.45313       |     | HMF            |
| 10.701           | BB   | 88.05828        | 1.40676e-2 | 1.23877         |     | DFF            |
| 11.098           | BV   | 428.39117       | 1.24636e-1 | 53.39291        |     | FDCA           |
| 11.295           | VB   | 153.40373       | 8.58660e-3 | 1.31722         |     | Furfural       |

**Figure S4. 30:** HPLC chromatography of HMF. Reaction condition: Fructose (1 mmol), DES 6 (5 mmol), 100 °C, 60 min.

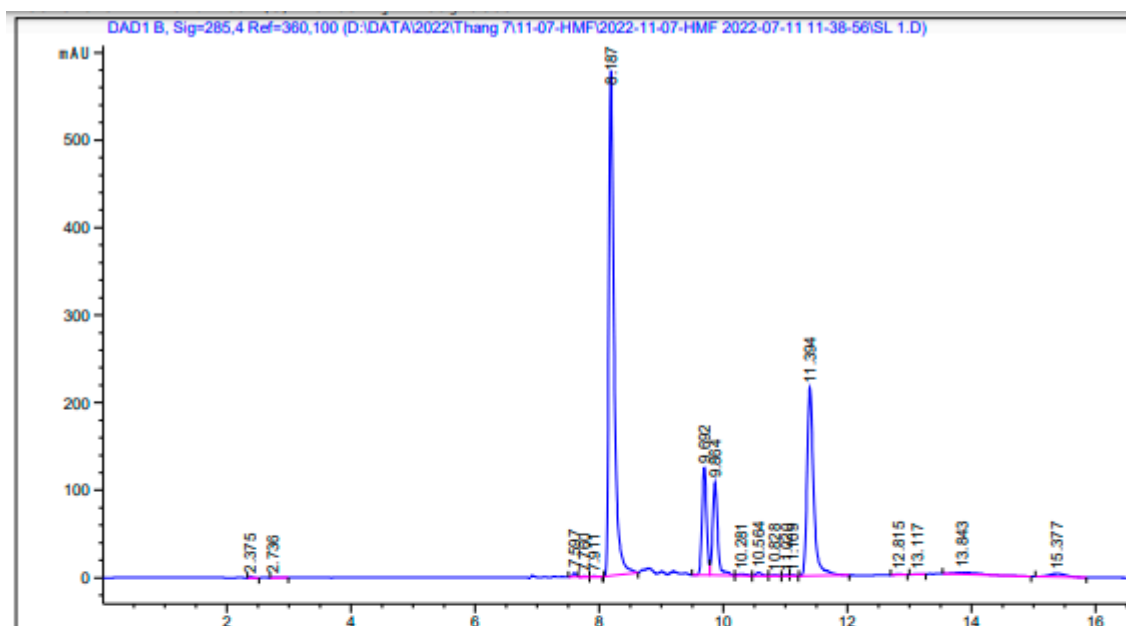

#### External Standard Report

Sorted By : Signal  
 Calib. Data Modified : 7/14/2022 9:11:36 AM  
 Multiplier : 1.0000  
 Dilution : 1.0000  
 Do not use Multiplier & Dilution Factor with ISTDs

Signal 1: DAD1 B, Sig=285,4 Ref=360,100

| RetTime<br>[min] | Type | Area<br>[mAU*s] | Amt/Area   | Amount<br>[ppm] | Grp | Name           |
|------------------|------|-----------------|------------|-----------------|-----|----------------|
| 8.770            | -    | -               | -          | -               | -   | Levulinic acid |
| 9.692            | BV   | 630.08673       | 1.38536e-2 | 8.72899         |     | HMF            |
| 10.281           | BB   | 17.19796        | 1.91958e-1 | 3.30128         |     | DFF            |
| 11.020           | BV   | 5.93214         | 2.79086e-1 | 1.65558         |     | FDCA           |
| 11.394           | BB   | 1588.69324      | 7.99980e-2 | 127.09226       |     | Furfural       |

**Figure S4. 31:** HPLC chromatography of HMF. Reaction condition: Fructose (1 mmol), DES 7 (5 mmol), 100 °C, 5 min.

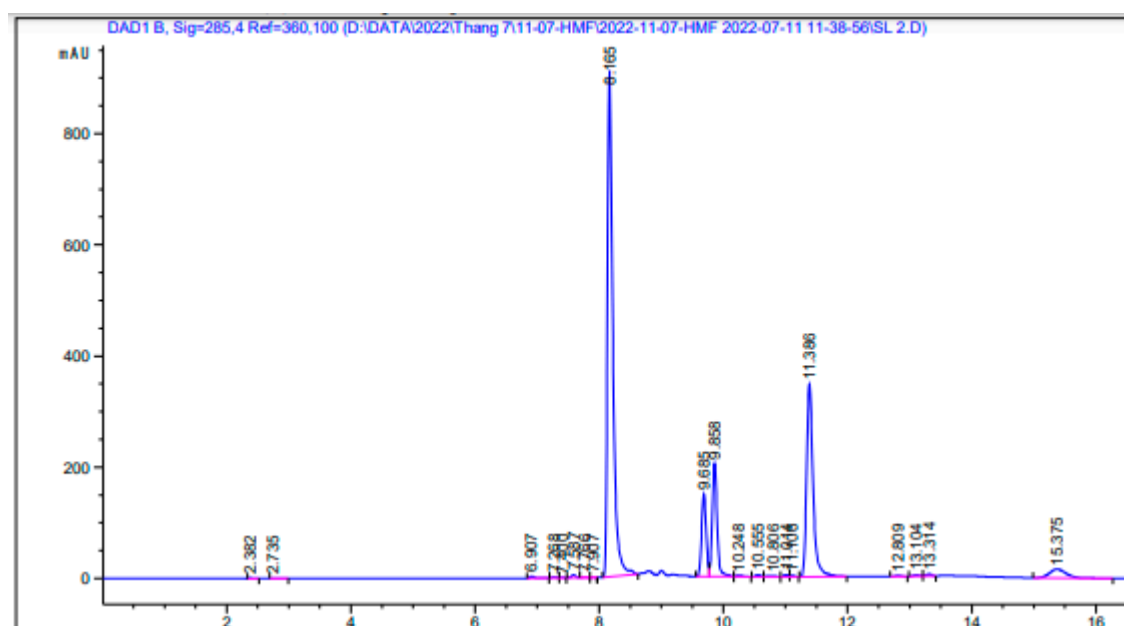

#### External Standard Report

Sorted By : Signal  
 Calib. Data Modified : 7/14/2022 9:11:36 AM  
 Multiplier : 1.0000  
 Dilution : 1.0000  
 Do not use Multiplier & Dilution Factor with ISTDs

Signal 1: DAD1 B, Sig=285,4 Ref=360,100

| RetTime<br>[min] | Type | Area<br>[mAU*s] | Amt/Area   | Amount<br>[ppm] | Grp | Name           |
|------------------|------|-----------------|------------|-----------------|-----|----------------|
| 8.770            | -    | -               | -          | -               | -   | Levulinic acid |
| 9.685            | BV   | 746.60907       | 1.33461e-2 | 9.96436         |     | HMF            |
| 10.248           | BB   | 13.64233        | 2.39359e-1 | 3.26542         |     | DFF            |
| 11.014           | BV   | 18.77409        | 1.55725e-1 | 2.92360         |     | FDCA           |
| 11.386           | BB   | 2519.22363      | 8.89755e-2 | 224.14906       |     | Furfural       |

**Figure S4. 32:** HPLC chromatography of HMF. Reaction condtion: Fructose (1 mmol), DES 7 (5 mmol), 100 °C, 10 min.

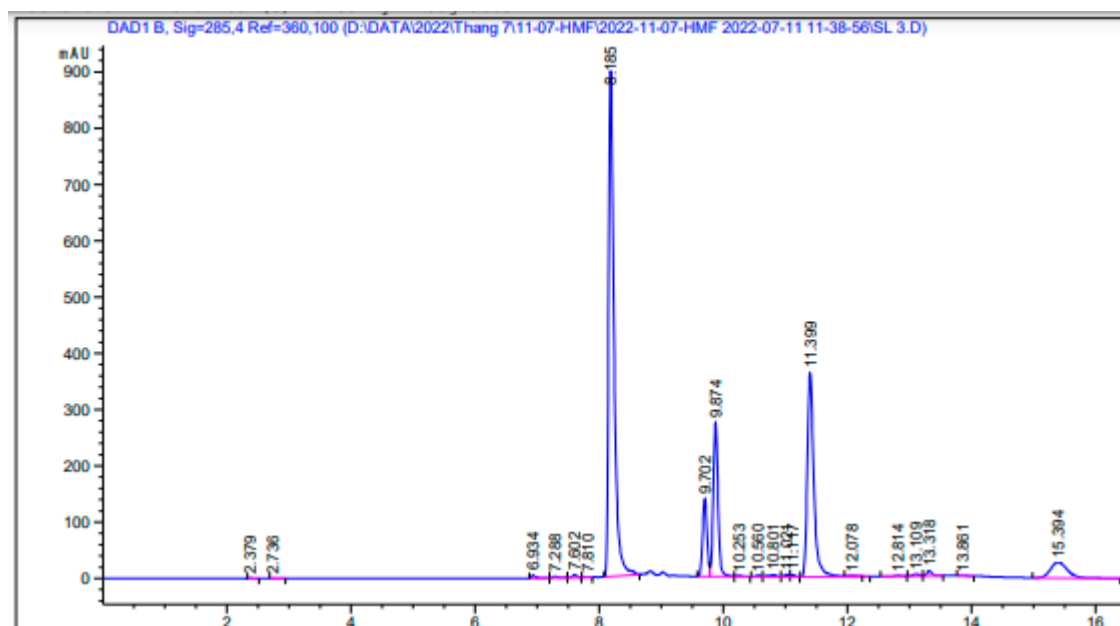

#### External Standard Report

Sorted By : Signal  
 Calib. Data Modified : 7/14/2022 9:11:36 AM  
 Multiplier : 1.0000  
 Dilution : 1.0000  
 Do not use Multiplier & Dilution Factor with ISTDs

Signal 1: DAD1 B, Sig=285,4 Ref=360,100

| RetTime<br>[min] | Type | Area<br>[mAU*s] | Amt/Area   | Amount<br>[ppm] | Grp | Name           |
|------------------|------|-----------------|------------|-----------------|-----|----------------|
| 8.770            | -    | -               | -          | -               | -   | Levulinic acid |
| 9.702            | BV   | 691.44653       | 1.35651e-2 | 9.37952         |     | HMF            |
| 10.253           | BB   | 9.75795         | 3.30626e-1 | 3.22623         |     | DFF            |
| 11.021           | VV   | 22.30971        | 1.46695e-1 | 3.27271         |     | FDCA           |
| 11.399           | BV R | 2674.48364      | 8.98652e-2 | 240.34309       |     | Furfural       |

**Figure S4. 33:** HPLC chromatography of HMF. Reaction condtion: Fructose (1 mmol), DES 7 (5 mmol), 100 °C, 20 min.

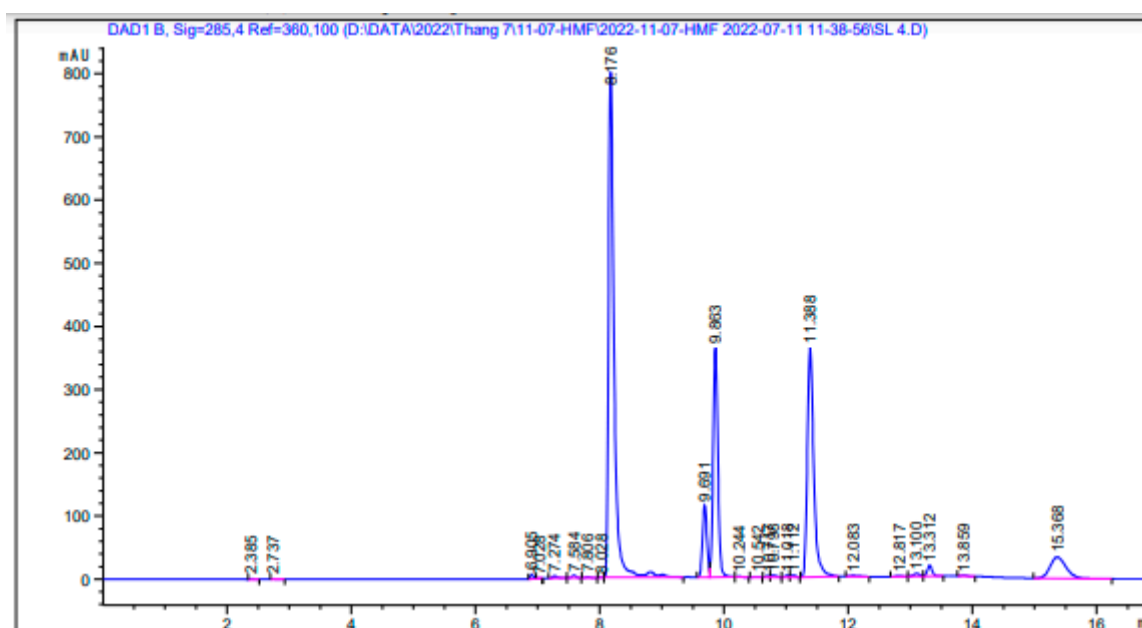

#### External Standard Report

Sorted By : Signal  
 Calib. Data Modified : 7/14/2022 9:11:36 AM  
 Multiplier : 1.0000  
 Dilution : 1.0000  
 Do not use Multiplier & Dilution Factor with ISTDs

Signal 1: DAD1 B, Sig=285,4 Ref=360,100

| RetTime<br>[min] | Type | Area<br>[mAU*s] | Amt/Area   | Amount<br>[ppm] | Grp | Name           |
|------------------|------|-----------------|------------|-----------------|-----|----------------|
| 8.770            | -    | -               | -          | -               | -   | Levulinic acid |
| 9.691            | BV   | 570.74200       | 1.41917e-2 | 8.09982         | -   | HMF            |
| 10.244           | BB   | 4.51703         | 7.02534e-1 | 3.17337         | -   | DFF            |
| 11.018           | BV   | 15.42087        | 1.68117e-1 | 2.59251         | -   | FDCA           |
| 11.388           | BB   | 2624.86206      | 8.95923e-2 | 235.16743       | -   | Furfural       |

**Figure S4. 34:** HPLC chromatography of HMF. Reaction condition: Fructose (1 mmol), DES 7 (5 mmol), 100 °C, 30 min.



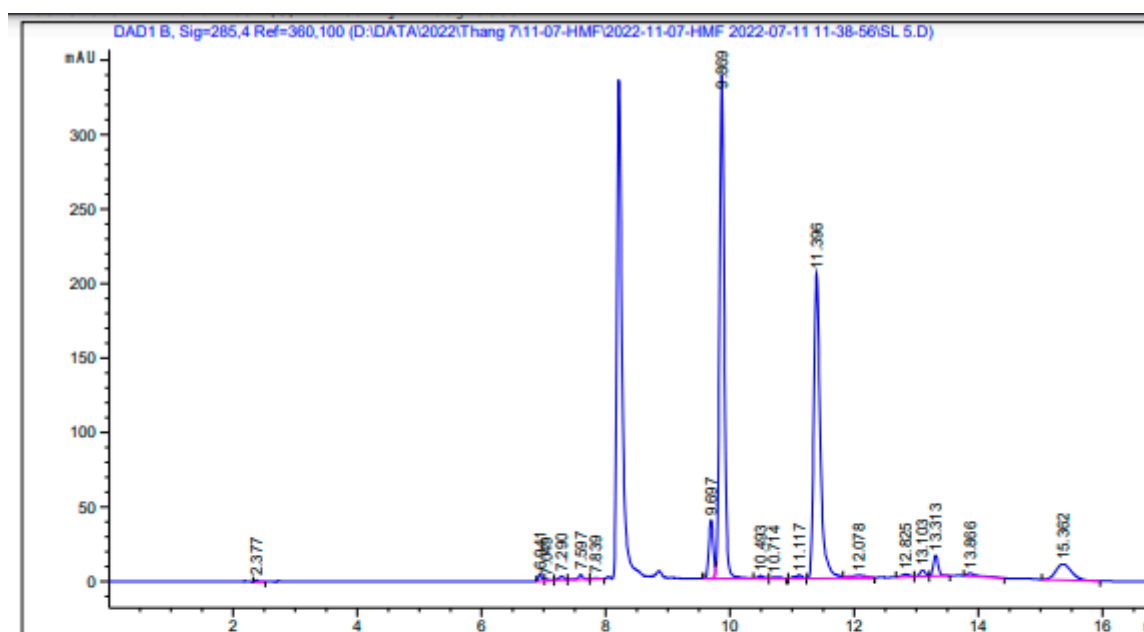

#### External Standard Report

Sorted By : Signal  
 Calib. Data Modified : 7/14/2022 9:11:36 AM  
 Multiplier : 1.0000  
 Dilution : 1.0000  
 Do not use Multiplier & Dilution Factor with ISTDs

Signal 1: DAD1 B, Sig=285,4 Ref=360,100

| RetTime<br>[min] | Type | Area<br>[mAU*s] | Amt/Area   | Amount<br>[ppm] | Grp      | Name           |
|------------------|------|-----------------|------------|-----------------|----------|----------------|
| 8.770            | -    | -               | -          | -               | -        | Levulinic acid |
| 9.697            | BV E | 192.19151       | 2.12623e-2 | 4.08643         | HMF      |                |
| 10.493           | VV E | 10.38449        | 3.11287e-1 | 3.23255         | DFF      |                |
| 11.117           | BB   | 19.93857        | 1.52397e-1 | 3.03859         | FDCA     |                |
| 11.396           | BV R | 1494.61084      | 7.84681e-2 | 117.27922       | Furfural |                |

**Figure S4. 35:** HPLC chromatography of HMF. Reaction condition: Fructose (1 mmol), DES 7 (5 mmol), 100 °C, 60 min.

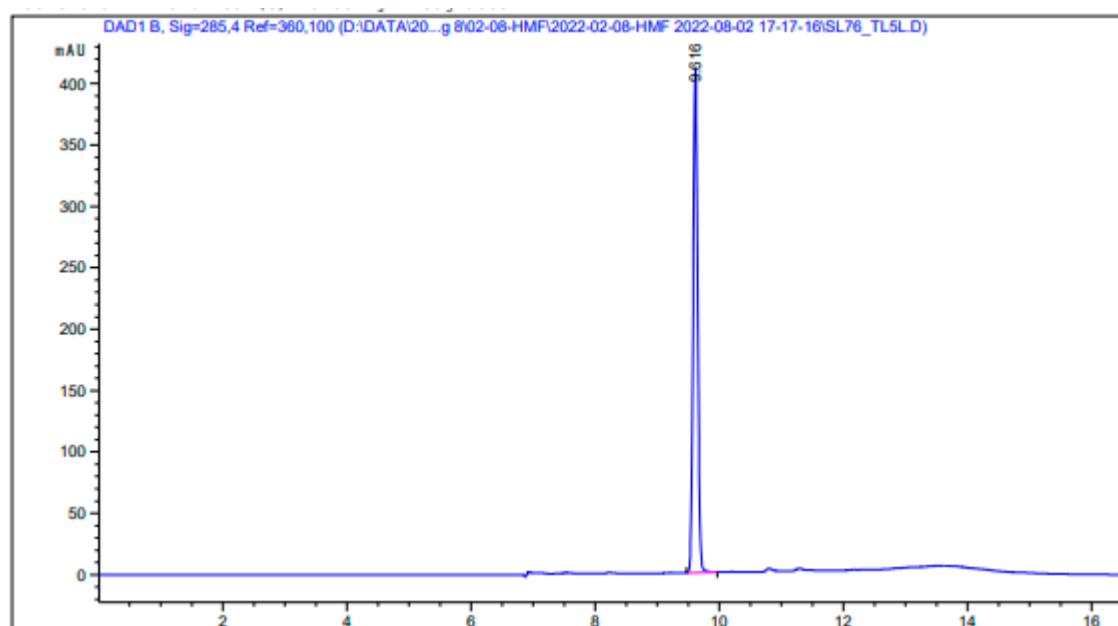

External Standard Report

Sorted By : Signal  
 Calib. Data Modified : 8/5/2022 1:06:36 AM  
 Multiplier : 1.0000  
 Dilution : 1.0000  
 Do not use Multiplier & Dilution Factor with ISTDs

Signal 1: DAD1 B, Sig=285,4 Ref=360,100

| RetTime<br>[min] | Type | Area<br>[mAU*s] | Amt/Area   | Amount<br>[ppm] | Grp | Name           |
|------------------|------|-----------------|------------|-----------------|-----|----------------|
| 8.900            | -    | -               | -          | -               | -   | Levulinic acid |
| 9.616            | BB   | 2094.48608      | 9.45913e-3 | 19.81201        | -   | HMF            |
| 10.501           | -    | -               | -          | -               | -   | DFF            |
| 11.097           | -    | -               | -          | -               | -   | FDCA           |
| 11.300           | -    | -               | -          | -               | -   | Furfural       |

**Figure S4. 36.** HPLC chromatography of HMF. Reaction condtion: Fructose (1 mmol), DES 8 (5 mmol), 100 °C, 5 min.

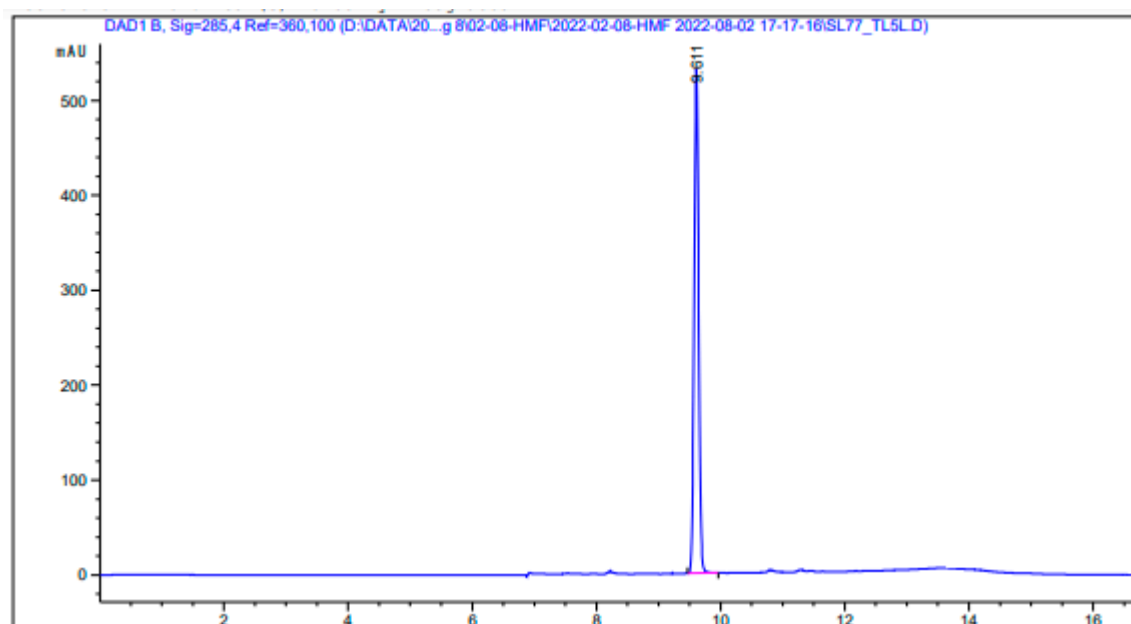

External Standard Report

Sorted By : Signal  
 Calib. Data Modified : 8/5/2022 1:06:36 AM  
 Multiplier : 1.0000  
 Dilution : 1.0000  
 Do not use Multiplier & Dilution Factor with ISTDs

Signal 1: DAD1 B, Sig=285,4 Ref=360,100

| RetTime<br>[min] | Type | Area<br>[mAU*s] | Amt/Area   | Amount<br>[ppm] | Grp | Name           |
|------------------|------|-----------------|------------|-----------------|-----|----------------|
| 8.900            | -    | -               | -          | -               | -   | Levulinic acid |
| 9.611            | BB   | 2707.33618      | 9.50220e-3 | 25.72566        | -   | HMF            |
| 10.501           | -    | -               | -          | -               | -   | DFF            |
| 11.097           | -    | -               | -          | -               | -   | FDCA           |
| 11.300           | -    | -               | -          | -               | -   | Furfural       |

**Figure S4. 37:** HPLC chromatography of HMF. Reaction condtion: Fructose (1 mmol), DES 8 (5 mmol), 100 °C, 10 min.

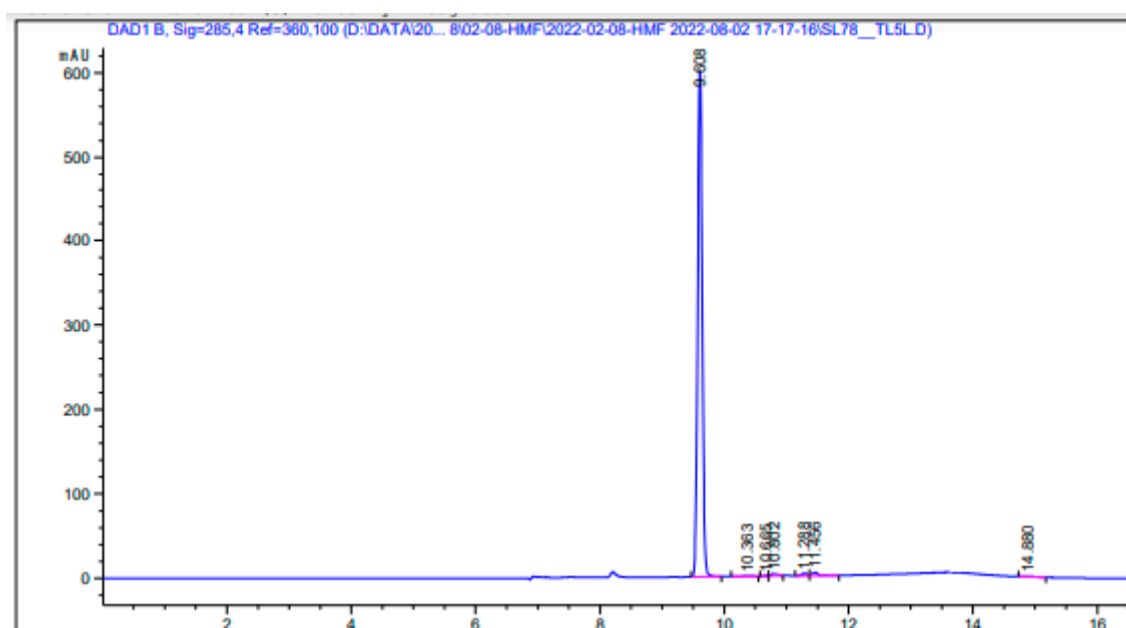

#### External Standard Report

Sorted By : Signal  
 Calib. Data Modified : 8/5/2022 1:06:36 AM  
 Multiplier : 1.0000  
 Dilution : 1.0000  
 Do not use Multiplier & Dilution Factor with ISTDs

Signal 1: DAD1 B, Sig=285,4 Ref=360,100

| RetTime<br>[min] | Type | Area<br>[mAU*s] | Amt/Area   | Amount<br>[ppm] | Grp | Name           |
|------------------|------|-----------------|------------|-----------------|-----|----------------|
| 8.900            |      | -               | -          | -               |     | Levulinic acid |
| 9.608            | BB   | 3058.57422      | 9.51911e-3 | 29.11490        |     | HMF            |
| 10.363           | BB   | 9.35254         | 4.49168e-2 | 4.20087e-1      |     | DFF            |
| 11.097           |      | -               | -          | -               |     | FDCA           |
| 11.288           | BV   | 16.72079        | 0.00000    | 0.00000         |     | Furfural       |

**Figure S4. 38:** HPLC chromatography of HMF. Reaction condtion: Fructose (1 mmol), DES 8 (5 mmol), 100 °C, 20 min.

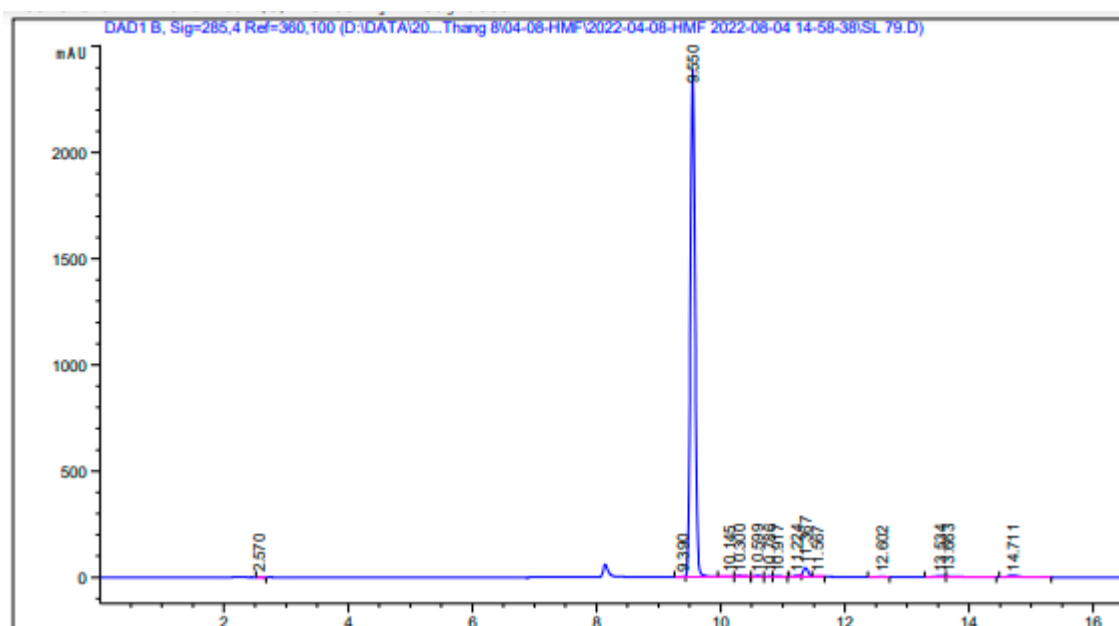

#### External Standard Report

Sorted By : Signal  
 Calib. Data Modified : 6/18/2022 1:43:53 AM  
 Multiplier : 1.0000  
 Dilution : 1.0000  
 Do not use Multiplier & Dilution Factor with ISTDs

Signal 1: DAD1 B, Sig=285,4 Ref=360,100

| RetTime<br>[min] | Type | Area<br>[mAU*s] | Amt/Area   | Amount<br>[ppm] | Grp | Name           |
|------------------|------|-----------------|------------|-----------------|-----|----------------|
| 8.900            | -    | -               | -          | -               | -   | Levulinic acid |
| 9.550            | VV R | 1.24680e4       | 9.61744e-3 | 119.91003       |     | HMF            |
| 10.599           | BB   | 32.32678        | 2.03875e-2 | 6.59061e-1      |     | DFF            |
| 11.224           | BV E | 27.93352        | 0.00000    | 0.00000         |     | FDCA           |
| 11.367           | VV R | 256.97153       | 9.24310e-3 | 2.37521         |     | Furfural       |

**Figure S4. 39:** HPLC chromatography of HMF. Reaction condtion: Fructose (1 mmol), DES 8 (5 mmol), 100 °C, 30 min.

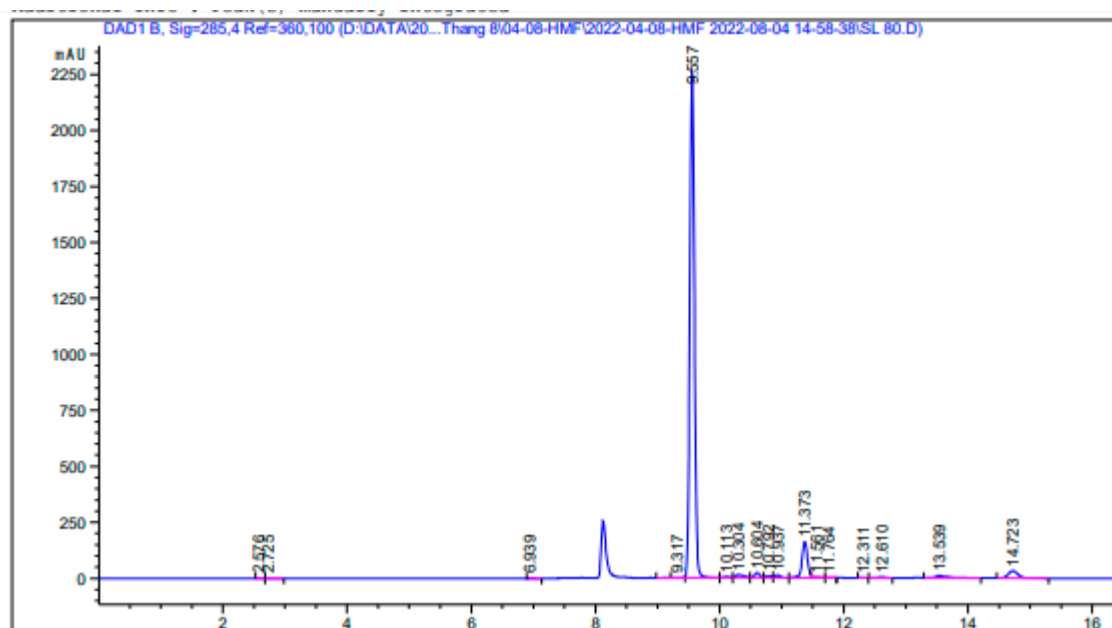

#### External Standard Report

Sorted By : Signal  
 Calib. Data Modified : 6/18/2022 1:43:53 AM  
 Multiplier : 1.0000  
 Dilution : 1.0000  
 Do not use Multiplier & Dilution Factor with ISTDs

Signal 1: DAD1 B, Sig=285,4 Ref=360,100

| RetTime<br>[min] | Type | Area<br>[mAU*s] | Amt/Area   | Amount<br>[ppm] | Grp | Name           |
|------------------|------|-----------------|------------|-----------------|-----|----------------|
| 8.900            | -    | -               | -          | -               | -   | Levulinic acid |
| 9.557            | VB R | 1.17089e4       | 9.61537e-3 | 112.58580       |     | HMF            |
| 10.604           | BV   | 117.79538       | 1.31422e-2 | 1.54809         |     | DFF            |
| 10.937           | VB   | 67.68656        | 0.00000    | 0.00000         |     | FDCA           |
| 11.373           | BV R | 984.14758       | 9.96159e-3 | 9.80368         |     | Furfural       |

**Figure S4. 40:** HPLC chromatography of HMF. Reaction condition: Fructose (1 mmol), DES 8 (5 mmol), 100 °C, 60 min.

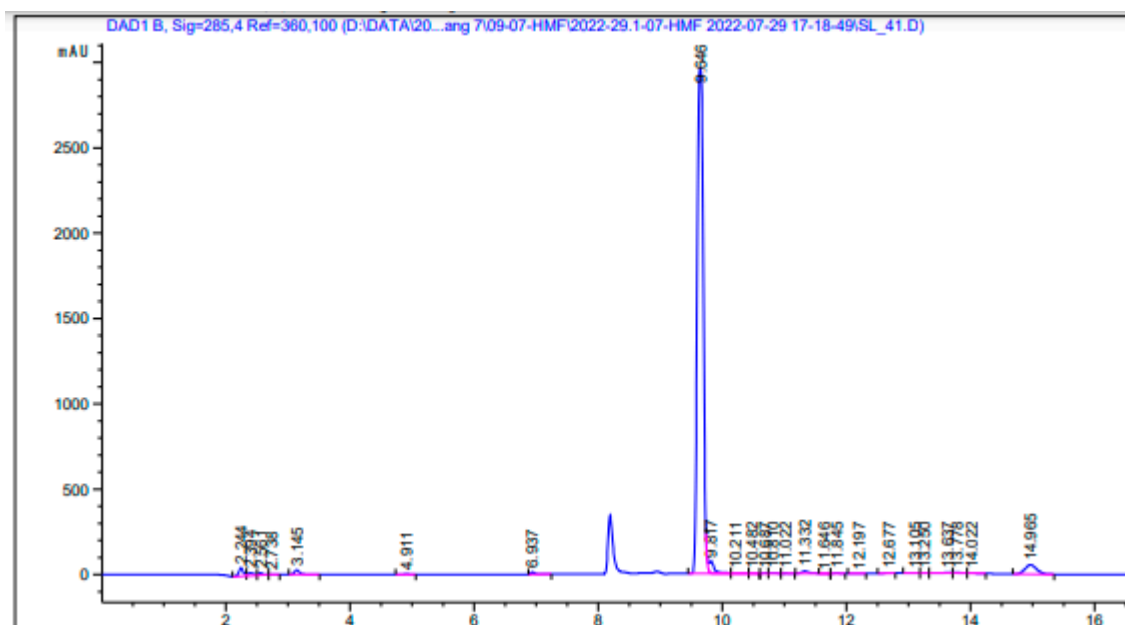

#### External Standard Report

Sorted By : Signal  
 Calib. Data Modified : 8/5/2022 1:49:08 AM  
 Multiplier : 1.0000  
 Dilution : 1.0000  
 Do not use Multiplier & Dilution Factor with ISTDs

Signal 1: DAD1 B, Sig=285,4 Ref=360,100

| RetTime<br>[min] | Type | Area<br>[mAU*s] | Amt/Area   | Amount<br>[ppm] | Grp | Name           |
|------------------|------|-----------------|------------|-----------------|-----|----------------|
| 8.900            | -    | -               | -          | -               | -   | Levulinic acid |
| 9.646            | BV R | 2.02014e4       | 9.62968e-3 | 194.53319       |     | HMF            |
| 10.211           | VV E | 55.94803        | 1.61715e-2 | 9.04766e-1      |     | DFF            |
| 11.022           | BB   | 3.71712         | 0.00000    | 0.00000         |     | FDCA           |
| 11.332           | BV R | 104.59485       | 7.82649e-3 | 8.18610e-1      |     | Furfural       |

**Figure S4. 41.** HPLC chromatography of HMF. Reaction condtion: Fructose (1 mmol), DES 9 (5 mmol), 100 °C, 5 min.

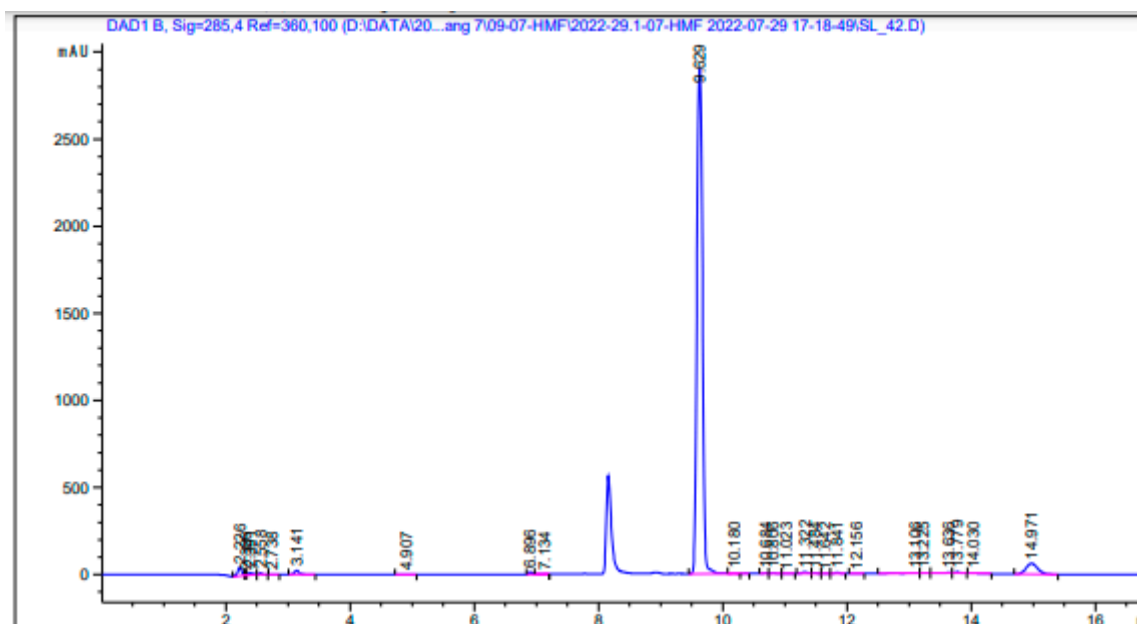

#### External Standard Report

Sorted By : Signal  
 Calib. Data Modified : 8/5/2022 1:49:08 AM  
 Multiplier : 1.0000  
 Dilution : 1.0000  
 Do not use Multiplier & Dilution Factor with ISTDs

Signal 1: DAD1 B, Sig=285,4 Ref=360,100

| RetTime<br>[min] | Type | Area<br>[mAU*s] | Amt/Area   | Amount<br>[ppm] | Grp | Name           |
|------------------|------|-----------------|------------|-----------------|-----|----------------|
| 8.900            | -    | -               | -          | -               | -   | Levulinic acid |
| 9.629            | BV R | 1.80241e4       | 9.62730e-3 | 173.52315       |     | HMF            |
| 10.180           | VV E | 5.10005         | 7.36959e-2 | 3.75853e-1      |     | DFF            |
| 11.023           | BB   | 6.20005         | 0.00000    | 0.00000         |     | FDCA           |
| 11.322           | BV   | 56.48049        | 5.79134e-3 | 3.27098e-1      |     | Furfural       |

**Figure S4. 42:** HPLC chromatography of HMF. Reaction condition: Fructose (1 mmol), DES 9 (5 mmol), 100 °C, 10 min.



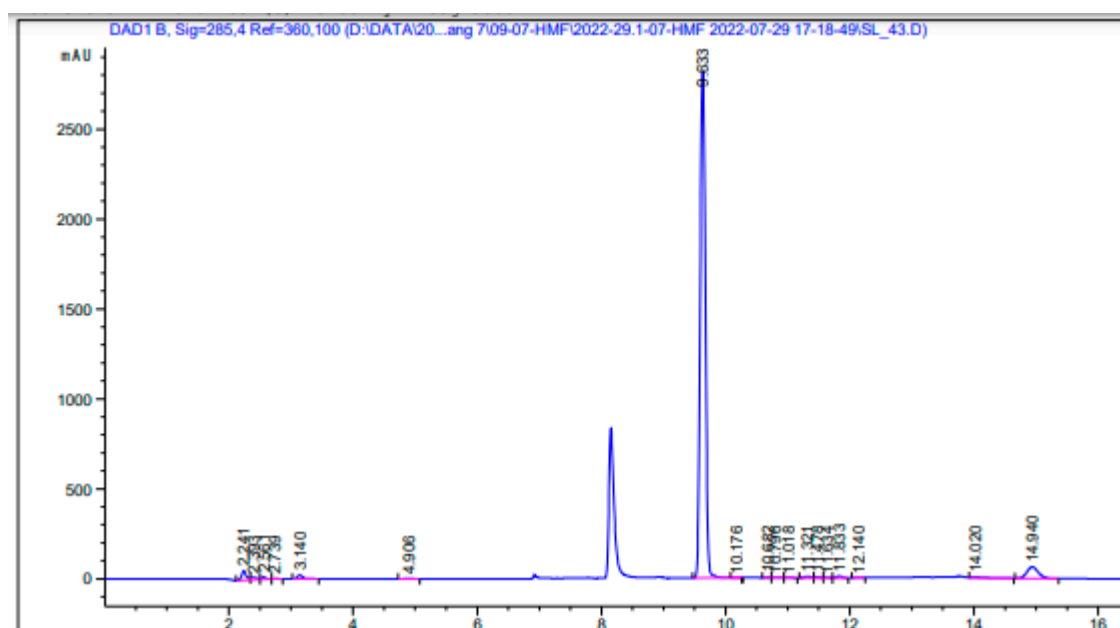

#### External Standard Report

Sorted By : Signal  
 Calib. Data Modified : 8/5/2022 1:49:08 AM  
 Multiplier : 1.0000  
 Dilution : 1.0000  
 Do not use Multiplier & Dilution Factor with ISTDs

Signal 1: DAD1 B, Sig=285,4 Ref=360,100

| RetTime<br>[min] | Type | Area<br>[mAU*s] | Amt/Area   | Amount<br>[ppm] | Grp | Name           |
|------------------|------|-----------------|------------|-----------------|-----|----------------|
| 8.900            | -    | -               | -          | -               | -   | Levulinic acid |
| 9.633            | BV R | 1.63927e4       | 9.62510e-3 | 157.78146       |     | HMF            |
| 10.176           | VB E | 4.81548         | 7.74362e-2 | 3.72893e-1      |     | DFF            |
| 11.018           | BB   | 8.26740         | 0.00000    | 0.00000         |     | FDCA           |
| 11.321           | BV   | 57.90589        | 5.90025e-3 | 3.41659e-1      |     | Furfural       |

**Figure S4. 43:** HPLC chromatography of HMF. Reaction condtion: Fructose (1 mmol), DES 9 (5 mmol), 100 °C, 20 min.

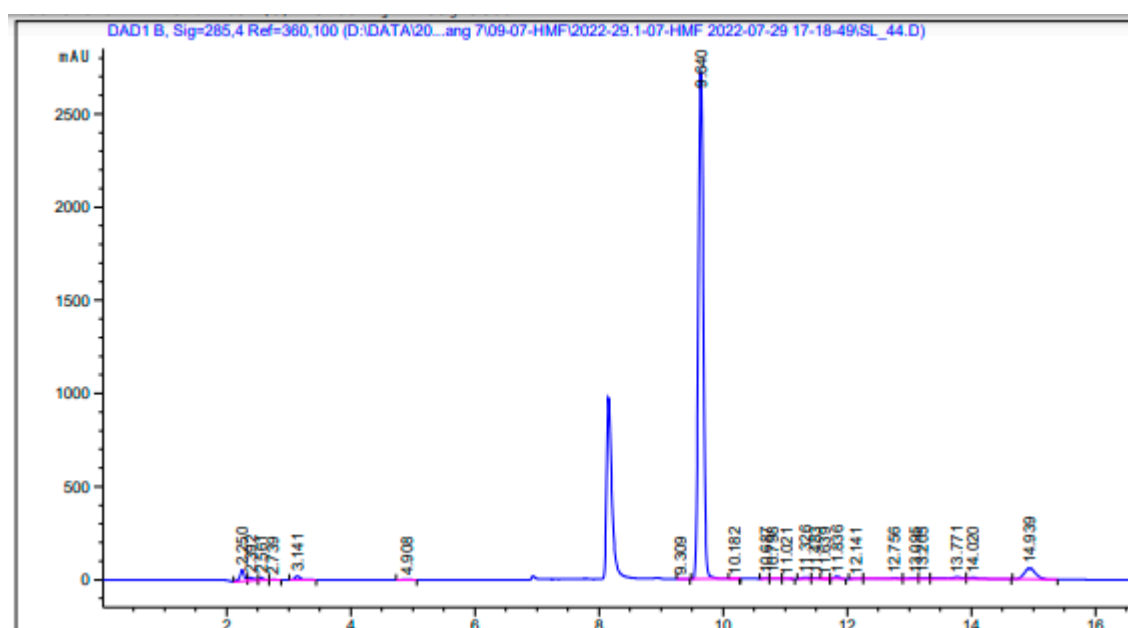

#### External Standard Report

Sorted By : Signal  
 Calib. Data Modified : 8/5/2022 1:49:08 AM  
 Multiplier : 1.0000  
 Dilution : 1.0000  
 Do not use Multiplier & Dilution Factor with ISTDs

Signal 1: DAD1 B, Sig=285,4 Ref=360,100

| RetTime<br>[min] | Type | Area<br>[mAU*s] | Amt/Area   | Amount<br>[ppm] | Grp | Name           |
|------------------|------|-----------------|------------|-----------------|-----|----------------|
| 8.900            | -    | -               | -          | -               | -   | Levulinic acid |
| 9.640            | BV R | 1.52517e4       | 9.62328e-3 | 146.77145       |     | HMF            |
| 10.182           | VB E | 5.63657         | 6.76712e-2 | 3.81434e-1      |     | DFF            |
| 11.021           | BB   | 9.22130         | 0.00000    | 0.00000         |     | FDCA           |
| 11.326           | BV   | 55.59239        | 5.72067e-3 | 3.18026e-1      |     | Furfural       |

**Figure S4. 44:** HPLC chromatography of HMF. Reaction condtion: Fructose (1 mmol), DES 9 (5 mmol), 100 °C, 30 min.

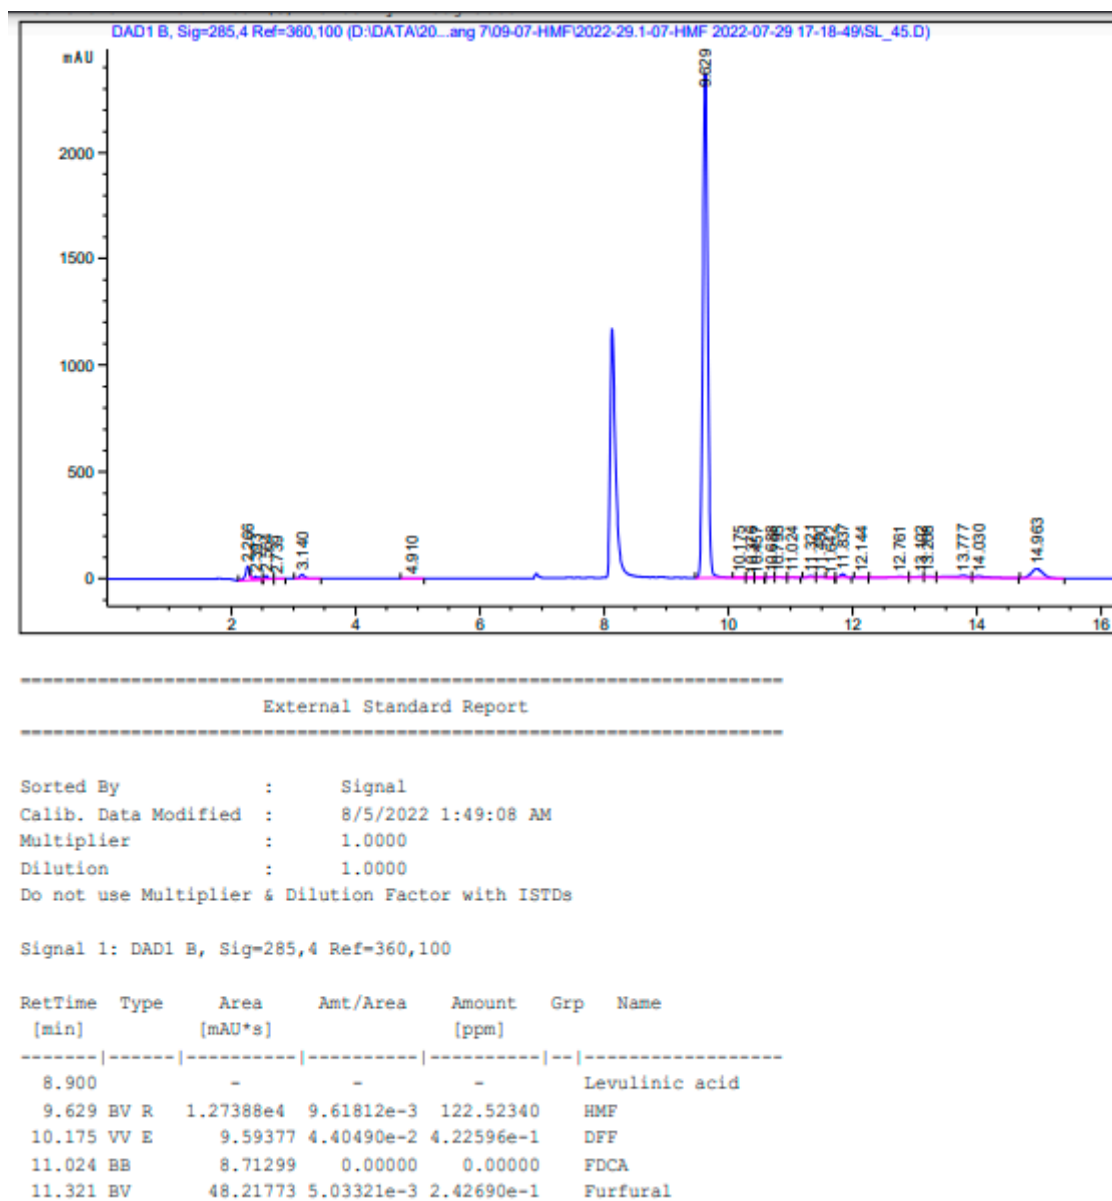

**Figure S4. 45:** HPLC chromatography of HMF. Reaction condition: Fructose (1 mmol), DES 9 (5 mmol), 100 °C, 60 min.

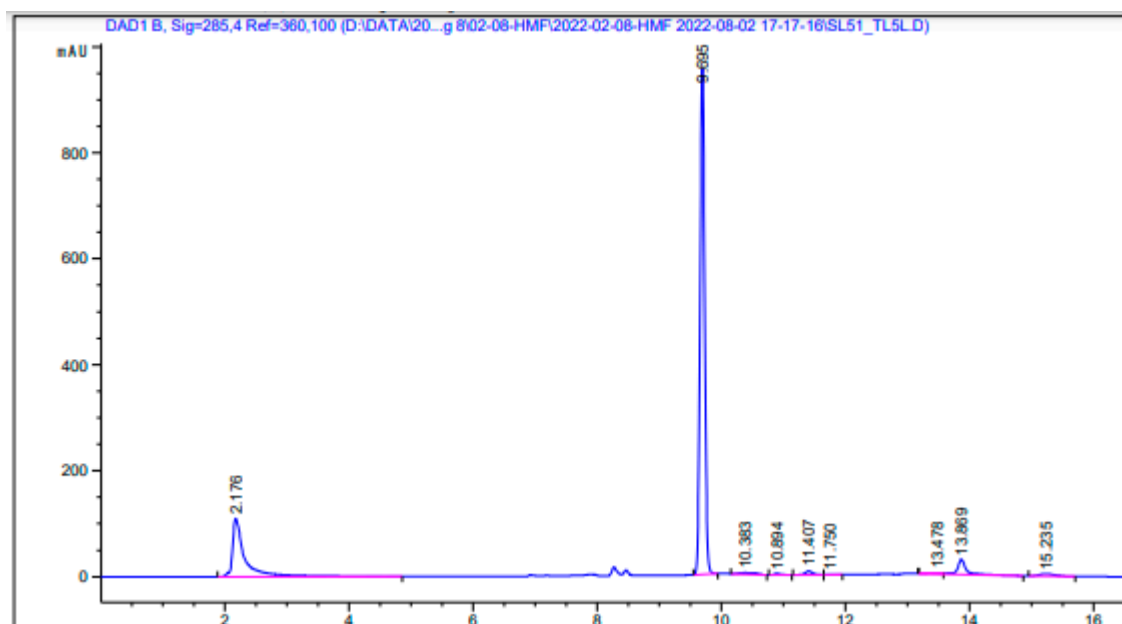

External Standard Report

Sorted By : Signal  
 Calib. Data Modified : 8/5/2022 1:49:08 AM  
 Multiplier : 1.0000  
 Dilution : 1.0000  
 Do not use Multiplier & Dilution Factor with ISTDs

Signal 1: DAD1 B, Sig=285,4 Ref=360,100

| RetTime<br>[min] | Type | Area<br>[mAU*s] | Amt/Area   | Amount<br>[ppm] | Grp | Name           |
|------------------|------|-----------------|------------|-----------------|-----|----------------|
| 8.900            | -    | -               | -          | -               | -   | Levulinic acid |
| 9.695            | BB   | 4935.60938      | 9.56866e-3 | 47.22718        |     | HMF            |
| 10.383           | BB   | 65.41271        | 1.53367e-2 | 1.00322         |     | DFF            |
| 10.894           | BB   | 21.08631        | 0.00000    | 0.00000         |     | FDCA           |
| 11.407           | BV   | 54.58800        | 5.63797e-3 | 3.07765e-1      |     | Furfural       |

**Figure S4. 46.** HPLC chromatography of HMF. Reaction condtion: Fructose (1 mmol), DES 10 (5 mmol), 100 °C, 5 min.

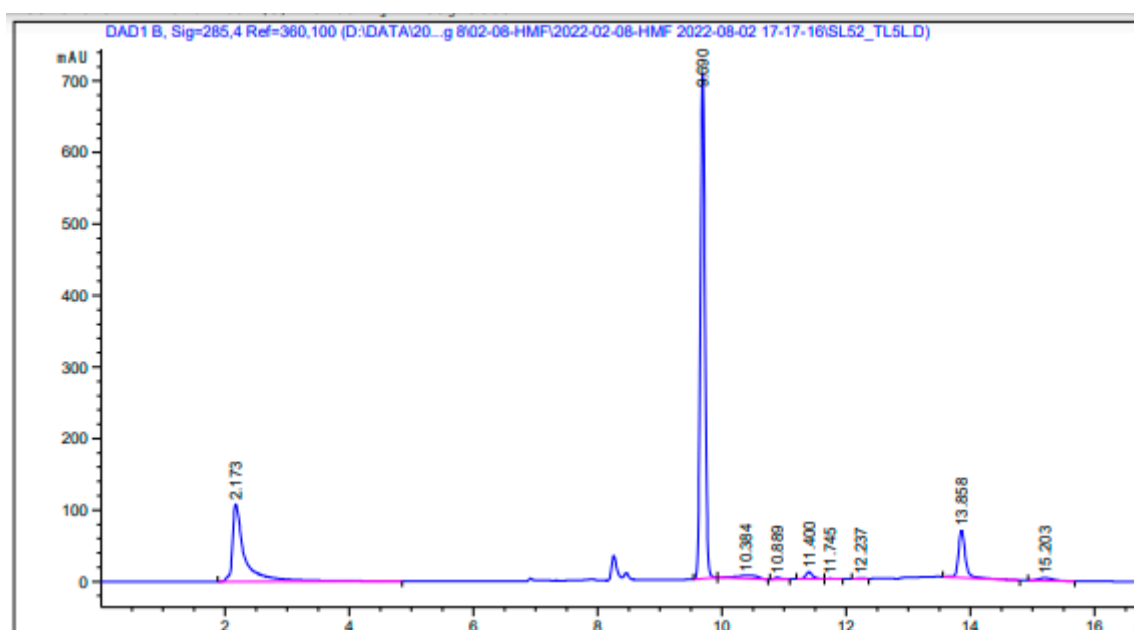

#### External Standard Report

Sorted By : Signal  
 Calib. Data Modified : 8/5/2022 1:49:08 AM  
 Multiplier : 1.0000  
 Dilution : 1.0000  
 Do not use Multiplier & Dilution Factor with ISTDs

Signal 1: DAD1 B, Sig=285,4 Ref=360,100

| RetTime<br>[min] | Type | Area<br>[mAU*s] | Amt/Area   | Amount<br>[ppm] | Grp | Name           |
|------------------|------|-----------------|------------|-----------------|-----|----------------|
| 8.900            | -    | -               | -          | -               | -   | Levulinic acid |
| 9.690            | BB   | 3651.02319      | 9.54025e-3 | 34.83168        |     | HMF            |
| 10.384           | BB   | 114.05468       | 1.32321e-2 | 1.50918         |     | DFF            |
| 10.889           | BB   | 18.42808        | 0.00000    | 0.00000         |     | FDCA           |
| 11.400           | BV   | 74.78346        | 6.87414e-3 | 5.14072e-1      |     | Furfural       |

**Figure S4. 47:** HPLC chromatography of HMF. Reaction condtion: Fructose (1 mmol), DES 10 (5 mmol), 100 °C, 10 min.

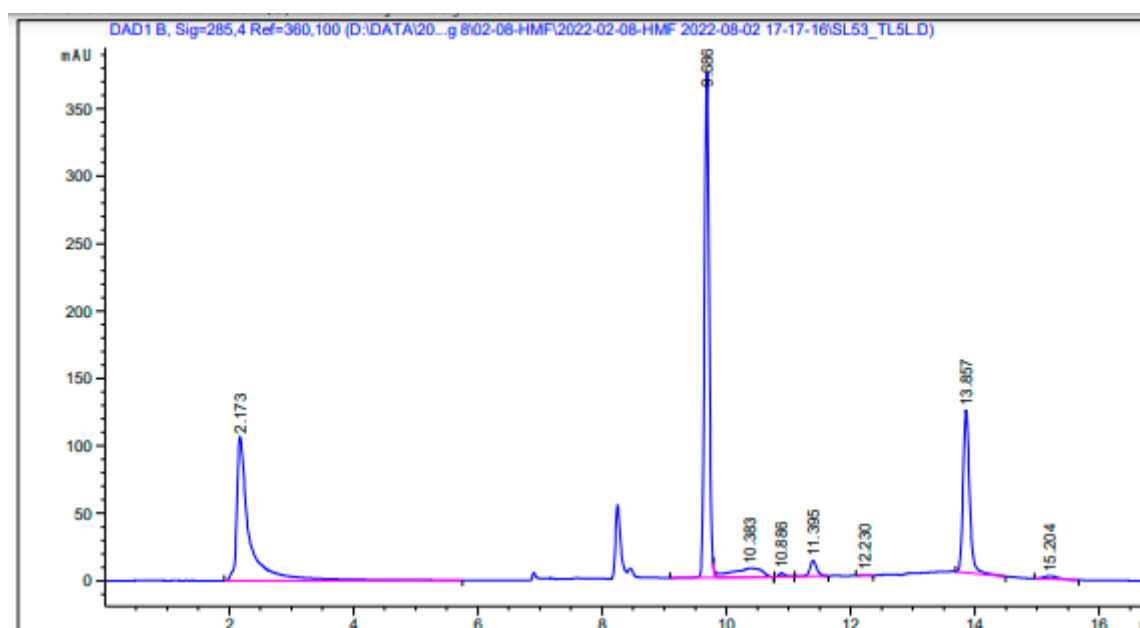

#### External Standard Report

Sorted By : Signal  
 Calib. Data Modified : 8/5/2022 1:49:08 AM  
 Multiplier : 1.0000  
 Dilution : 1.0000  
 Do not use Multiplier & Dilution Factor with ISTDs

Signal 1: DAD1 B, Sig=285,4 Ref=360,100

| RetTime<br>[min] | Type | Area<br>[mAU*s] | Amt/Area   | Amount<br>[ppm] | Grp | Name           |
|------------------|------|-----------------|------------|-----------------|-----|----------------|
| 8.900            | -    | -               | -          | -               | -   | Levulinic acid |
| 9.686            | BV R | 1945.79761      | 9.44459e-3 | 18.37726        |     | HMF            |
| 10.383           | VB E | 230.53564       | 1.18021e-2 | 2.72080         |     | DFF            |
| 10.886           | BB   | 17.67013        | 0.00000    | 0.00000         |     | FDCA           |
| 11.395           | BB   | 87.24858        | 7.35152e-3 | 6.41409e-1      |     | Furfural       |

**Figure S4. 48:** HPLC chromatography of HMF. Reaction condition: Fructose (1 mmol), DES 10 (5 mmol), 100 °C, 20 min.

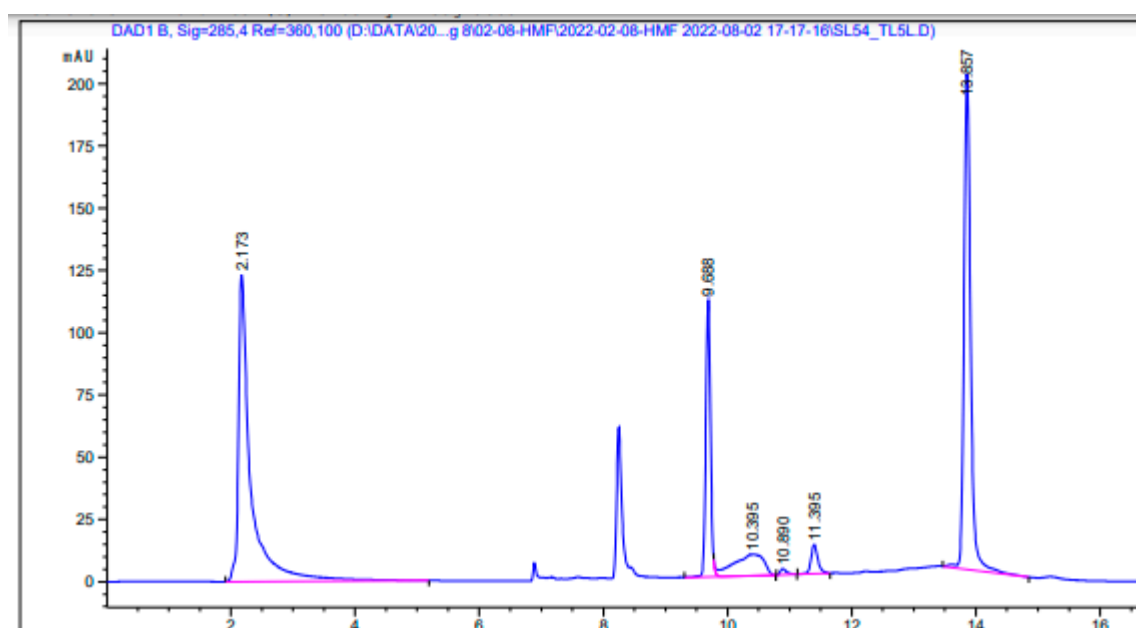

#### External Standard Report

Sorted By : Signal  
 Calib. Data Modified : 8/5/2022 1:49:08 AM  
 Multiplier : 1.0000  
 Dilution : 1.0000  
 Do not use Multiplier & Dilution Factor with ISTDs

Signal 1: DAD1 B, Sig=285,4 Ref=360,100

| RetTime<br>[min] | Type | Area<br>[mAU*s] | Amt/Area   | Amount<br>[ppm] | Grp | Name           |
|------------------|------|-----------------|------------|-----------------|-----|----------------|
| 8.900            | -    | -               | -          | -               | -   | Levulinic acid |
| 9.688            | BV R | 585.88055       | 8.96917e-3 | 5.25486         |     | HMF            |
| 10.395           | VB E | 295.59583       | 1.14939e-2 | 3.39755         |     | DFF            |
| 10.890           | BB   | 17.18932        | 0.00000    | 0.00000         |     | FDCA           |
| 11.395           | BB   | 88.53149        | 7.39302e-3 | 6.54515e-1      |     | Furfural       |

**Figure S4. 49:** HPLC chromatography of HMF. Reaction condition: Fructose (1 mmol), DES 10 (5 mmol), 100 °C, 30 min.

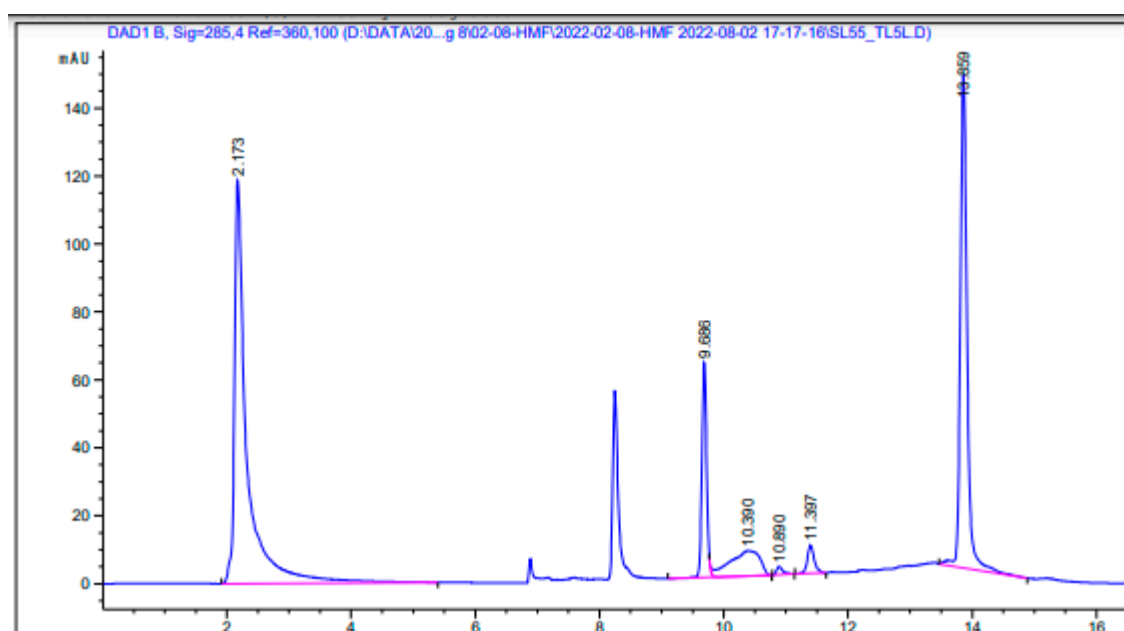

#### External Standard Report

Sorted By : Signal  
 Calib. Data Modified : 8/5/2022 1:49:08 AM  
 Multiplier : 1.0000  
 Dilution : 1.0000  
 Do not use Multiplier & Dilution Factor with ISTDs

Signal 1: DAD1 B, Sig=285,4 Ref=360,100

| RetTime<br>[min] | Type | Area<br>[mAU*s] | Amt/Area   | Amount<br>[ppm] | Grp | Name           |
|------------------|------|-----------------|------------|-----------------|-----|----------------|
| 8.900            | -    | -               | -          | -               | -   | Levulinic acid |
| 9.686            | BV R | 339.63965       | 8.47599e-3 | 2.87878         | -   | HMF            |
| 10.390           | VB E | 254.16875       | 1.16719e-2 | 2.96663         | -   | DFF            |
| 10.890           | BB   | 17.61457        | 0.00000    | 0.00000         | -   | FDCA           |
| 11.397           | BB   | 63.26206        | 6.26561e-3 | 3.96375e-1      | -   | Furfural       |

**Figure S4. 50:** HPLC chromatography of HMF. Reaction condition: Fructose (1 mmol), DES 10 (5 mmol), 100 °C, 60 min.



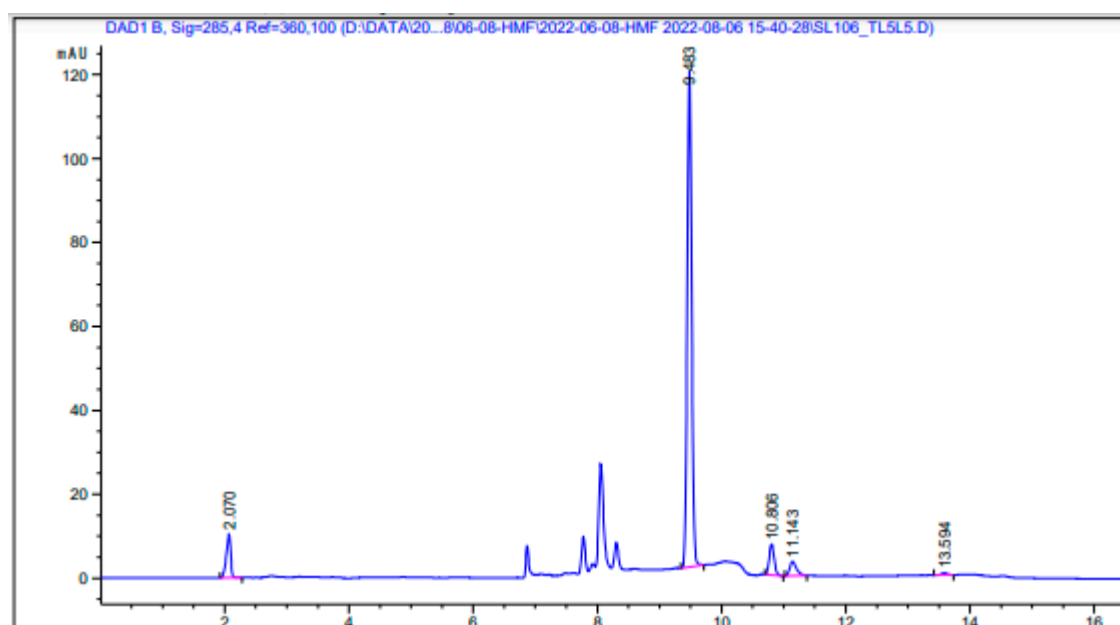

External Standard Report

Sorted By : Signal  
 Calib. Data Modified : 8/5/2022 1:49:08 AM  
 Multiplier : 1.0000  
 Dilution : 1.0000  
 Do not use Multiplier & Dilution Factor with ISTDs

Signal 1: DAD1 B, Sig=285,4 Ref=360,100

| RetTime<br>[min] | Type | Area<br>[mAU*s] | Amt/Area   | Amount<br>[ppm] | Grp | Name           |
|------------------|------|-----------------|------------|-----------------|-----|----------------|
| 8.900            | -    | -               | -          | -               | -   | Levulinic acid |
| 9.483            | BB   | 594.25568       | 8.97876e-3 | 5.33568         | -   | HMF            |
| 10.201           | -    | -               | -          | -               | -   | DFF            |
| 11.143           | BB   | 25.19542        | 0.00000    | 0.00000         | -   | FDCA           |
| 11.300           | -    | -               | -          | -               | -   | Furfural       |

**Figure S4. 51.** HPLC chromatography of HMF. Reaction condition: Fructose (1 mmol), DES 11 (5 mmol), 100 °C, 5 min.

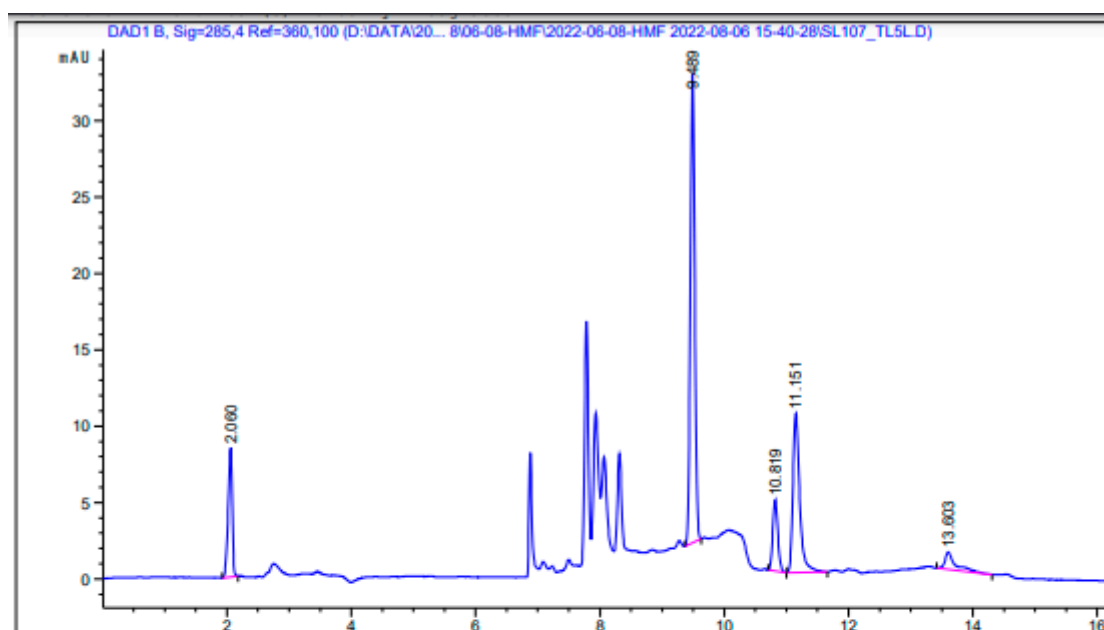

External Standard Report

Sorted By : Signal  
 Calib. Data Modified : 8/5/2022 1:49:08 AM  
 Multiplier : 1.0000  
 Dilution : 1.0000  
 Do not use Multiplier & Dilution Factor with ISTDs

Signal 1: DAD1 B, Sig=285,4 Ref=360,100

| RetTime<br>[min] | Type | Area<br>[mAU*s] | Amt/Area   | Amount<br>[ppm] | Grp  | Name           |
|------------------|------|-----------------|------------|-----------------|------|----------------|
| 8.900            | -    | -               | -          | -               | -    | Levulinic acid |
| 9.489            | BB   | 153.07805       | 7.04591e-3 | 1.07857         | HMF  |                |
| 10.201           | -    | -               | -          | -               | -    | DFF            |
| 11.151           | BB   | 78.81751        | 0.00000    | 0.00000         | FDCA |                |
| 11.300           | -    | -               | -          | -               | -    | Furfural       |

**Figure S4. 52:** HPLC chromatography of HMF. Reaction condition: Fructose (1 mmol), DES 11 (5 mmol), 100 °C, 10 min.

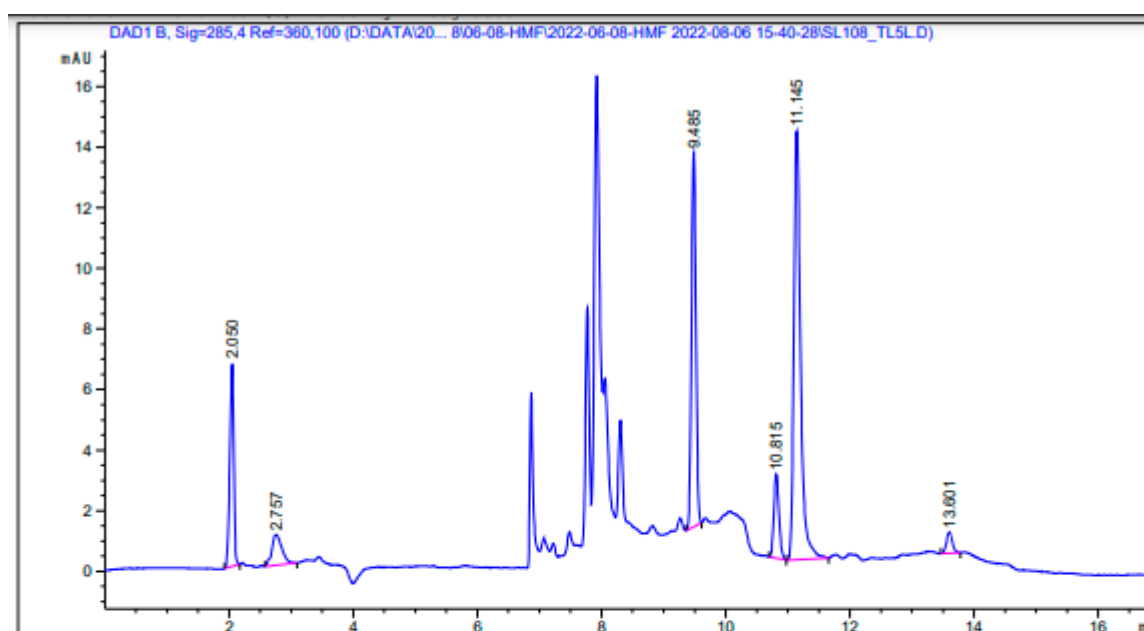

#### External Standard Report

Sorted By : Signal  
 Calib. Data Modified : 8/5/2022 1:49:08 AM  
 Multiplier : 1.0000  
 Dilution : 1.0000  
 Do not use Multiplier & Dilution Factor with ISTDs

Signal 1: DAD1 B, Sig=285,4 Ref=360,100

| RetTime<br>[min] | Type | Area<br>[mAU*s] | Amt/Area   | Amount<br>[ppm] | Grp | Name           |
|------------------|------|-----------------|------------|-----------------|-----|----------------|
| 8.900            | -    | -               | -          | -               | -   | Levulinic acid |
| 9.485            | BB   | 61.39161        | 3.15766e-3 | 1.93854e-1      | -   | HMF            |
| 10.201           | -    | -               | -          | -               | -   | DFF            |
| 11.145           | BB   | 105.72366       | 0.00000    | 0.00000         | -   | FDCA           |
| 11.300           | -    | -               | -          | -               | -   | Furfural       |

**Figure S4. 53:** HPLC chromatography of HMF. Reaction condition: Fructose (1 mmol), DES 11 (5 mmol), 100 °C, 20 min.

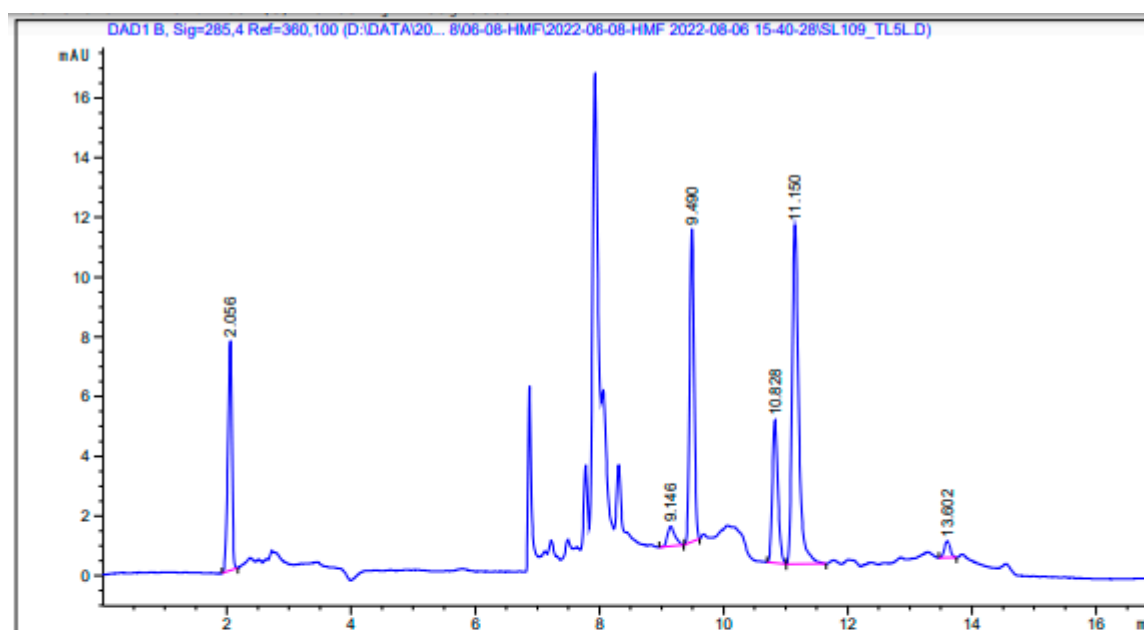

#### External Standard Report

Sorted By : Signal  
 Calib. Data Modified : 8/5/2022 1:49:08 AM  
 Multiplier : 1.0000  
 Dilution : 1.0000  
 Do not use Multiplier & Dilution Factor with ISTDs

Signal 1: DAD1 B, Sig=285,4 Ref=360,100

| RetTime<br>[min] | Type | Area<br>[mAU*s] | Amt/Area   | Amount<br>[ppm] | Grp | Name           |
|------------------|------|-----------------|------------|-----------------|-----|----------------|
| 8.900            | -    | -               | -          | -               | -   | Levulinic acid |
| 9.490            | BB   | 52.21555        | 2.01684e-3 | 1.05310e-1      | -   | HMF            |
| 10.201           | -    | -               | -          | -               | -   | DFF            |
| 11.150           | BB   | 82.99045        | 0.00000    | 0.00000         | -   | FDCA           |
| 11.300           | -    | -               | -          | -               | -   | Furfural       |

**Figure S4. 54:** HPLC chromatography of HMF. Reaction condition: Fructose (1 mmol), DES 11 (5 mmol), 100 °C, 30 min.

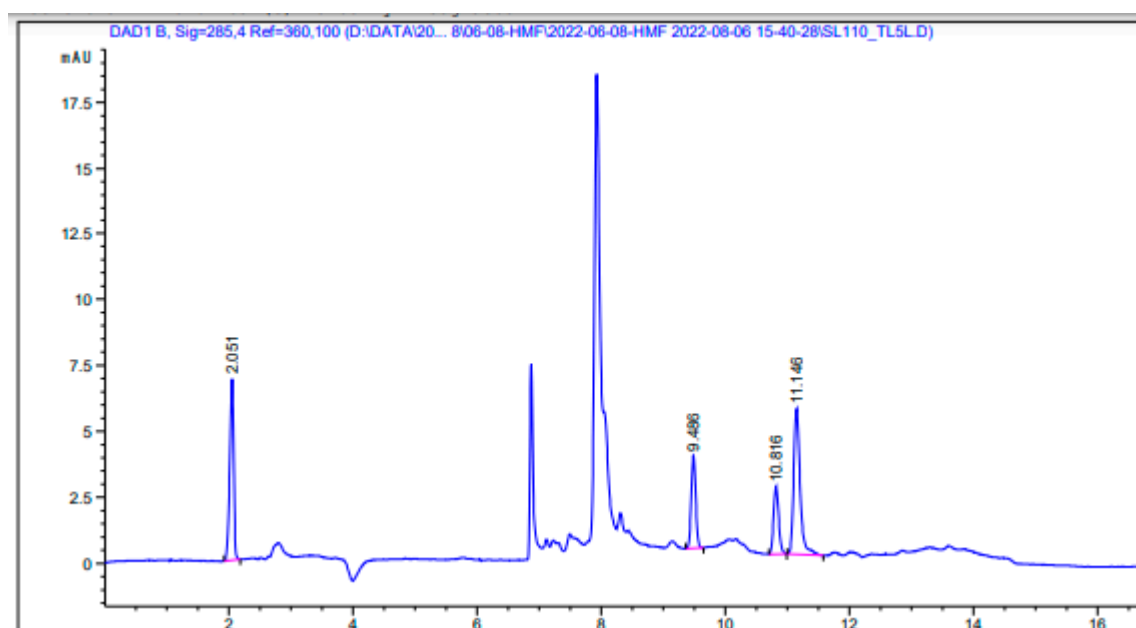

#### External Standard Report

Sorted By : Signal  
 Calib. Data Modified : 8/5/2022 1:49:08 AM  
 Multiplier : 1.0000  
 Dilution : 1.0000  
 Do not use Multiplier & Dilution Factor with ISTDs

Signal 1: DAD1 B, Sig=285,4 Ref=360,100

| RetTime<br>[min] | Type | Area<br>[mAU*s] | Amt/Area | Amount<br>[ppm] | Grp | Name           |
|------------------|------|-----------------|----------|-----------------|-----|----------------|
| 8.900            | -    | -               | -        | -               | -   | Levulinic acid |
| 9.486            | BB   | 17.58814        | 0.00000  | 0.00000         | -   | HMF            |
| 10.201           | -    | -               | -        | -               | -   | DFF            |
| 11.146           | BB   | 39.66236        | 0.00000  | 0.00000         | -   | FDCA           |
| 11.300           | -    | -               | -        | -               | -   | Furfural       |

**Figure S4. 55:** HPLC chromatography of HMF. Reaction condition: Fructose (1 mmol), DES 11 (5 mmol), 100 °C, 60 min.

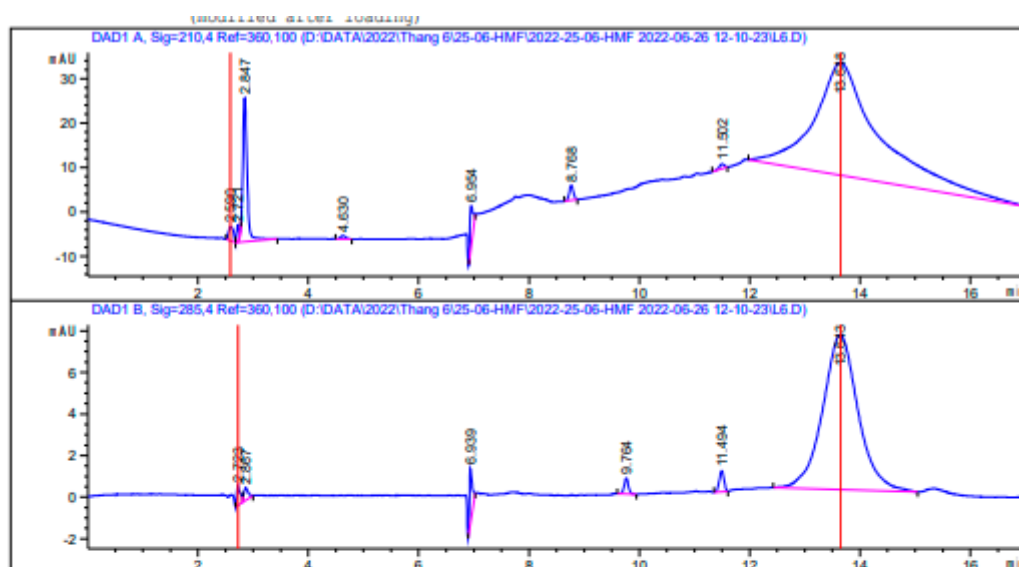

#### External Standard Report

Sorted By : Signal  
 Calib. Data Modified : 6/27/2022 10:36:03 AM  
 Multiplier : 1.0000  
 Dilution : 1.0000  
 Do not use Multiplier & Dilution Factor with ISTDs

Signal 1: DAD1 A, Sig=210,4 Ref=360,100

Signal 2: DAD1 B, Sig=285,4 Ref=360,100

| RetTime<br>[min] | Type | Area<br>[mAU*s] | Ant/Area | Amount<br>[ppm] | Grp | Name           |
|------------------|------|-----------------|----------|-----------------|-----|----------------|
| 8.792            | -    | -               | -        | -               | -   | Levulinic acid |
| 9.764            | BB   | 4.10547         | 0.00000  | 0.00000         | -   | HMF            |
| 10.392           | -    | -               | -        | -               | -   | DFF            |
| 10.700           | -    | -               | -        | -               | -   | FDCA           |

C-DAD 6/27/2022 11:32:54 AM SYSTEM

Page 1 of 2

**Figure S4. 56:** HPLC chromatography of HMF. Reaction condtion: Fructose (1 mmol), DES 12 (5 mmol), 100 °C, 5 min.

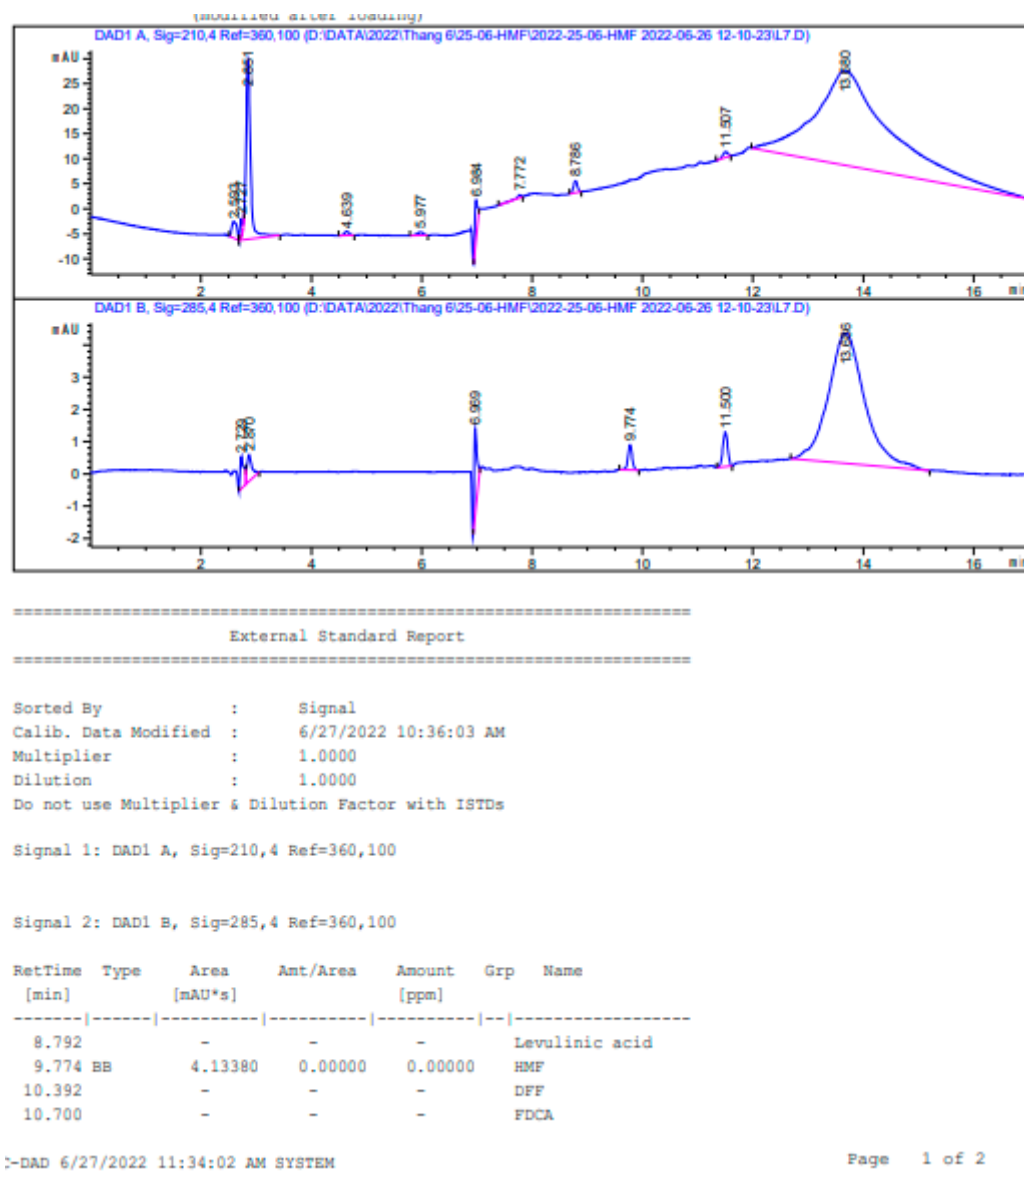

**Figure S4. 57:** HPLC chromatography of HMF. Reaction condtion: Fructose (1 mmol), DES 12 (5 mmol), 100 °C, 10 min.

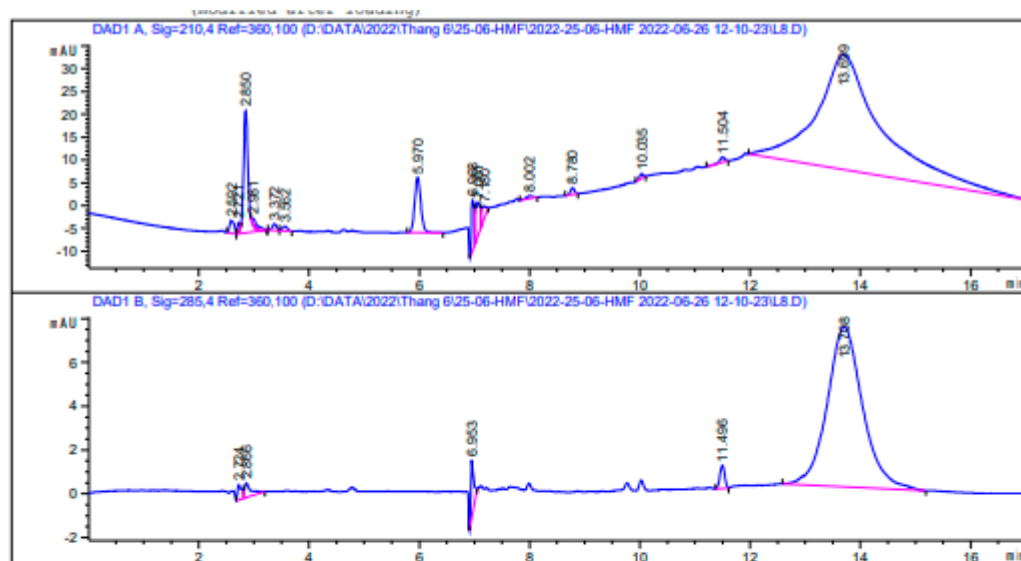

# External Standard Report

Sorted By : Signal  
 Calib. Data Modified : 6/27/2022 10:36:03 AM  
 Multiplier : 1.0000  
 Dilution : 1.0000  
 Do not use Multiplier & Dilution Factor with ISTDs

Signal 1: DAD1 A, Sig=210,4 Ref=360,100

Signal 2: DAD1 B, Sig=285,4 Ref=360,100

| RetTime<br>[min] | Type | Area<br>[mAU*s] | Ant/Area | Amount<br>[ppm] | Grp | Name           |
|------------------|------|-----------------|----------|-----------------|-----|----------------|
| 8.792            | -    | -               | -        | -               | -   | Levulinic acid |
| 9.600            | -    | -               | -        | -               | -   | HMF            |
| 10.392           | -    | -               | -        | -               | -   | DFF            |
| 10.700           | -    | -               | -        | -               | -   | FDCA           |

**Figure S4. 58:** HPLC chromatography of HMF. Reaction condtion: Fructose (1 mmol), DES 12 (5 mmol), 100 °C, 20 min.



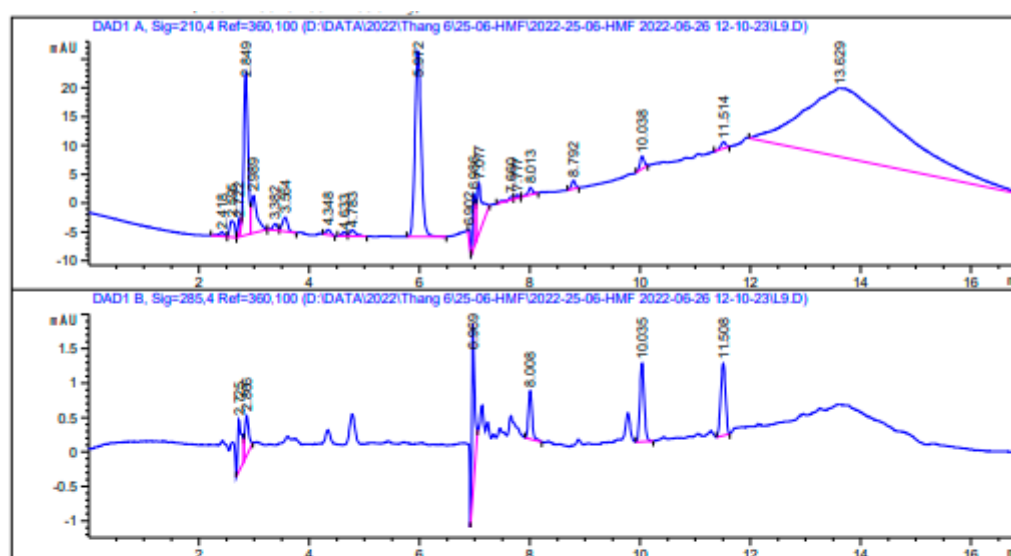

External Standard Report

Sorted By : Signal  
 Calib. Data Modified : 6/27/2022 10:36:03 AM  
 Multiplier : 1.0000  
 Dilution : 1.0000  
 Do not use Multiplier & Dilution Factor with ISTDs

Signal 1: DAD1 A, Sig=210,4 Ref=360,100

Signal 2: DAD1 B, Sig=285,4 Ref=360,100

| RetTime<br>[min] | Type | Area<br>[mAU*s] | Ant/Area | Amount<br>[ppm] | Grp | Name           |
|------------------|------|-----------------|----------|-----------------|-----|----------------|
| 8.792            | -    | -               | -        | -               | -   | Levulinic acid |
| 9.600            | -    | -               | -        | -               | -   | HMF            |
| 10.392           | -    | -               | -        | -               | -   | DFF            |
| 10.700           | -    | -               | -        | -               | -   | FDCA           |

C-DAD 6/27/2022 11:34:49 AM SYSTEM

Page 1 of 2

**Figure S4. 59:** HPLC chromatography of HMF. Reaction condtion: Fructose (1 mmol), DES 12 (5 mmol), 100 °C, 30 min.

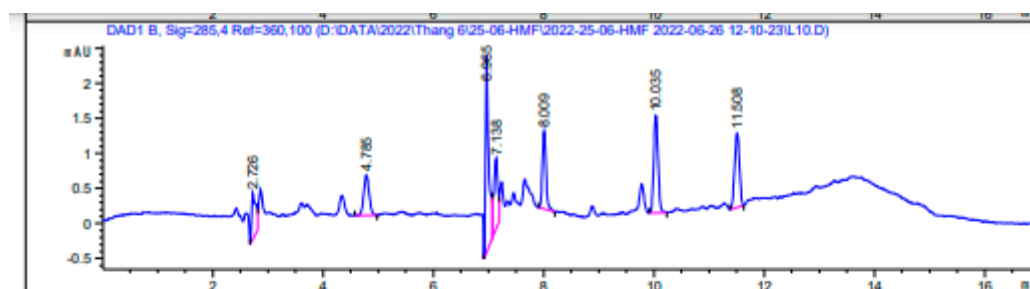

# External Standard Report

Sorted By : Signal  
 Calib. Data Modified : 6/27/2022 10:36:03 AM  
 Multiplier : 1.0000  
 Dilution : 1.0000  
 Do not use Multiplier & Dilution Factor with ISTDs

Signal 1: DAD1 A, Sig=210,4 Ref=360,100

Signal 2: DAD1 B, Sig=285,4 Ref=360,100

| RetTime<br>[min] | Type | Area<br>[mAU*s] | Amt/Area | Amount<br>[ppm] | Grp | Name           |
|------------------|------|-----------------|----------|-----------------|-----|----------------|
| 8.792            | -    | -               | -        | -               | -   | Levulinic acid |
| 9.600            | -    | -               | -        | -               | -   | HMF            |
| 10.392           | -    | -               | -        | -               | -   | DFF            |
| 10.700           | -    | -               | -        | -               | -   | FDCA           |

C-DAD 6/27/2022 11:35:13 AM SYSTEM

Page 1 of 2

File D:\DATA\2022\Thang 6\25-06-HMF\2022-25-06-HMF 2022-06-26 12-10-23\L10.D  
 Sample Name: L10

| RetTime<br>[min] | Type | Area<br>[mAU*s] | Amt/Area | Amount<br>[ppm] | Grp | Name     |
|------------------|------|-----------------|----------|-----------------|-----|----------|
| 11.508           | BB   | 6.42179         | 0.00000  | 0.00000         | -   | Furfural |
| Totals :         |      |                 |          | 0.00000         |     |          |

**Figure S4. 60:** HPLC chromatography of HMF. Reaction condition: Fructose (1 mmol), DES 12 (5 mmol), 100 °C, 60 min.

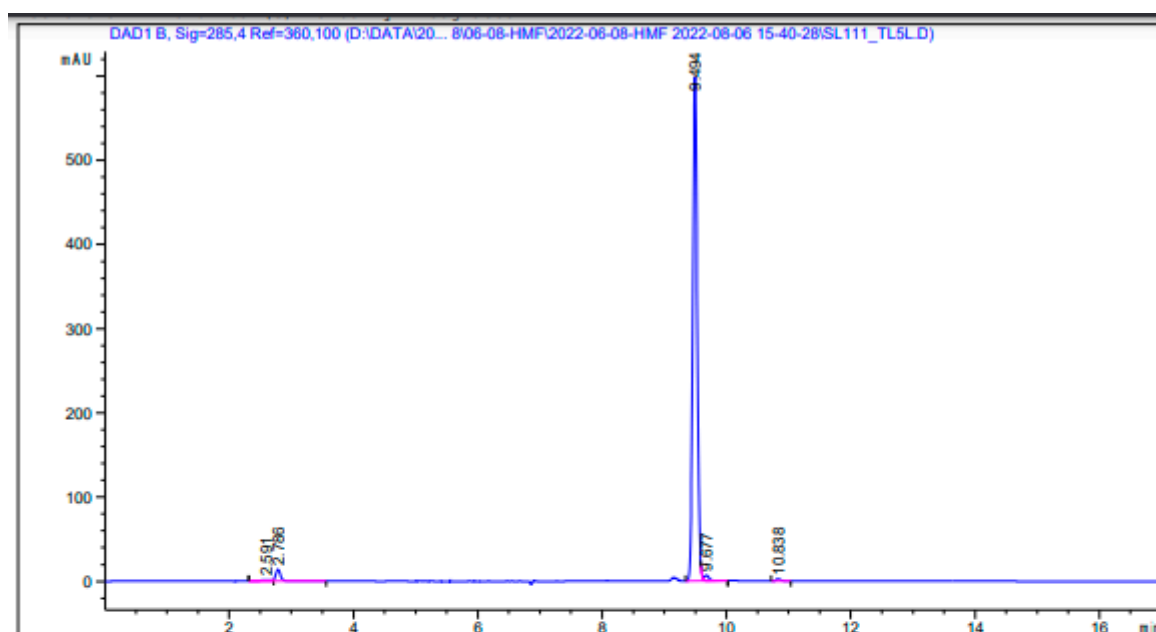

External Standard Report

Sorted By : Signal  
 Calib. Data Modified : 8/5/2022 1:49:08 AM  
 Multiplier : 1.0000  
 Dilution : 1.0000  
 Do not use Multiplier & Dilution Factor with ISTDs

Signal 1: DAD1 B, Sig=285,4 Ref=360,100

| RetTime<br>[min] | Type | Area<br>[mAU*s] | Amt/Area | Amount<br>[ppm] | Grp | Name           |
|------------------|------|-----------------|----------|-----------------|-----|----------------|
| 8.900            | -    | -               | -        | -               | -   | Levulinic acid |
| 9.677            | VB E | 40.98586        | 0.00000  | 0.00000         | -   | HMF            |
| 10.201           | -    | -               | -        | -               | -   | DFF            |
| 10.838           | BB   | 13.56850        | 0.00000  | 0.00000         | -   | FDCA           |
| 11.300           | -    | -               | -        | -               | -   | Furfural       |

**Figure S4. 61:** HPLC chromatography of HMF. Reaction condition: Fructose (1 mmol), DES 1 (5 mmol), 80 °C, 5 min.

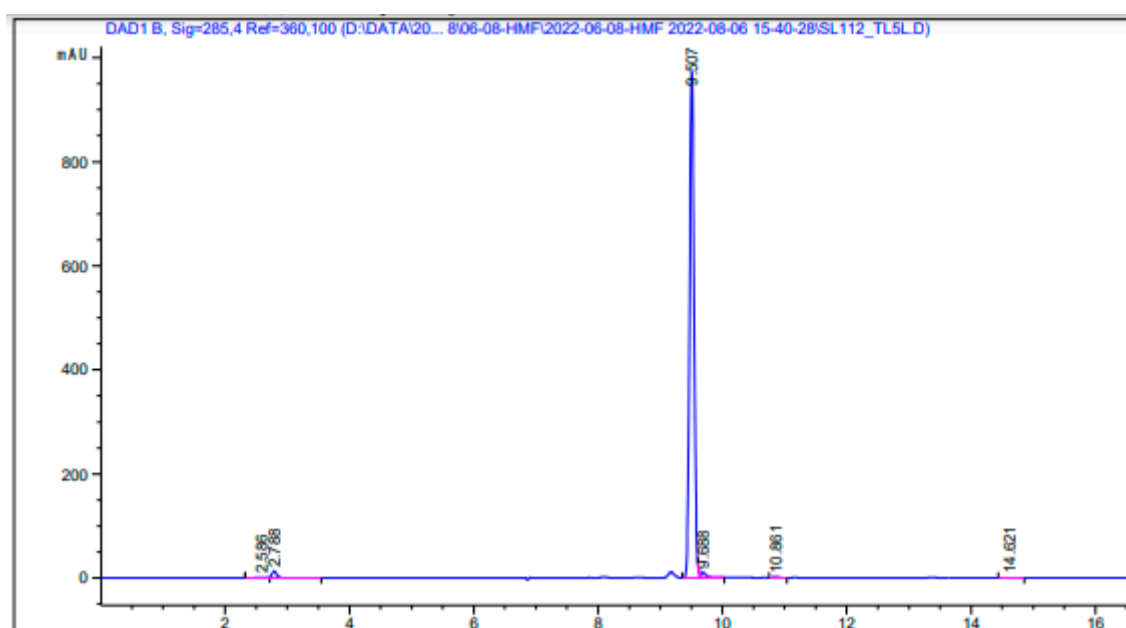

External Standard Report

Sorted By : Signal  
 Calib. Data Modified : 8/5/2022 1:49:08 AM  
 Multiplier : 1.0000  
 Dilution : 1.0000  
 Do not use Multiplier & Dilution Factor with ISTDs

Signal 1: DAD1 B, Sig=285,4 Ref=360,100

| RetTime<br>[min] | Type | Area<br>[mAU*s] | Amt/Area   | Amount<br>[ppm] | Grp | Name           |
|------------------|------|-----------------|------------|-----------------|-----|----------------|
| 8.900            | -    | -               | -          | -               | -   | Levulinic acid |
| 9.688            | VB E | 61.27998        | 3.14584e-3 | 1.92777e-1      | -   | HMF            |
| 10.201           | -    | -               | -          | -               | -   | DFF            |
| 10.861           | BB   | 10.99834        | 0.00000    | 0.00000         | -   | FDCA           |
| 11.300           | -    | -               | -          | -               | -   | Furfural       |

**Figure S4. 62:** HPLC chromatography of HMF. Reaction condition: Fructose (1 mmol), DES 1 (5 mmol), 80 °C, 10 min.

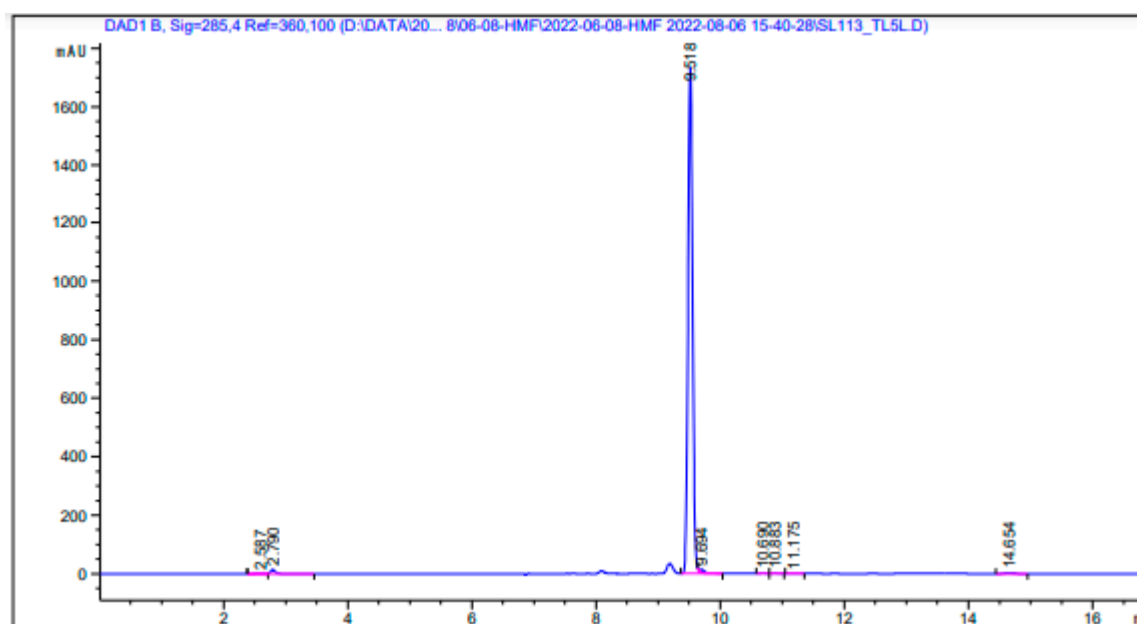

External Standard Report

Sorted By : Signal  
 Calib. Data Modified : 8/5/2022 1:49:08 AM  
 Multiplier : 1.0000  
 Dilution : 1.0000  
 Do not use Multiplier & Dilution Factor with ISTDs

Signal 1: DAD1 B, Sig=285,4 Ref=360,100

| RetTime<br>[min] | Type | Area<br>[mAU*s] | Amt/Area   | Amount<br>[ppm] | Grp | Name           |
|------------------|------|-----------------|------------|-----------------|-----|----------------|
| 8.900            | -    | -               | -          | -               | -   | Levulinic acid |
| 9.518            | BV R | 8820.30273      | 9.60423e-3 | 84.71217        | -   | HMF            |
| 10.201           | -    | -               | -          | -               | -   | DFF            |
| 11.175           | BB   | 6.42345         | 0.00000    | 0.00000         | -   | FDCA           |
| 11.300           | -    | -               | -          | -               | -   | Furfural       |

**Figure S4. 63:** HPLC chromatography of HMF. Reaction condition: Fructose (1 mmol), DES 1 (5 mmol), 80 °C, 20 min.

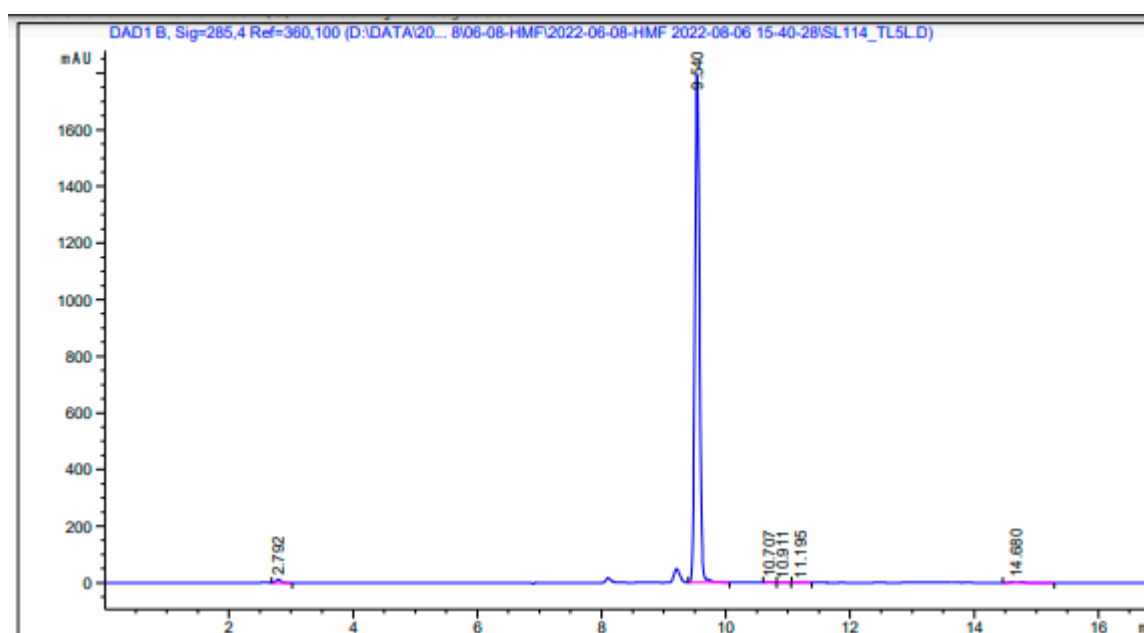

#### External Standard Report

Sorted By : Signal  
 Calib. Data Modified : 8/5/2022 1:49:08 AM  
 Multiplier : 1.0000  
 Dilution : 1.0000  
 Do not use Multiplier & Dilution Factor with ISTDs

Signal 1: DAD1 B, Sig=285,4 Ref=360,100

| RetTime<br>[min] | Type | Area<br>[mAU*s] | Amt/Area   | Amount<br>[ppm] | Grp | Name           |
|------------------|------|-----------------|------------|-----------------|-----|----------------|
| 8.900            | -    | -               | -          | -               | -   | Levulinic acid |
| 9.540            | BB   | 9224.59961      | 9.60621e-3 | 88.61340        | -   | HMF            |
| 10.201           | -    | -               | -          | -               | -   | DFF            |
| 11.195           | BB   | 6.93750         | 0.00000    | 0.00000         | -   | FDCA           |
| 11.300           | -    | -               | -          | -               | -   | Furfural       |

**Figure S4. 64:** HPLC chromatography of HMF. Reaction condtion: Fructose (1 mmol), DES 1 (5 mmol), 80 °C, 30 min.

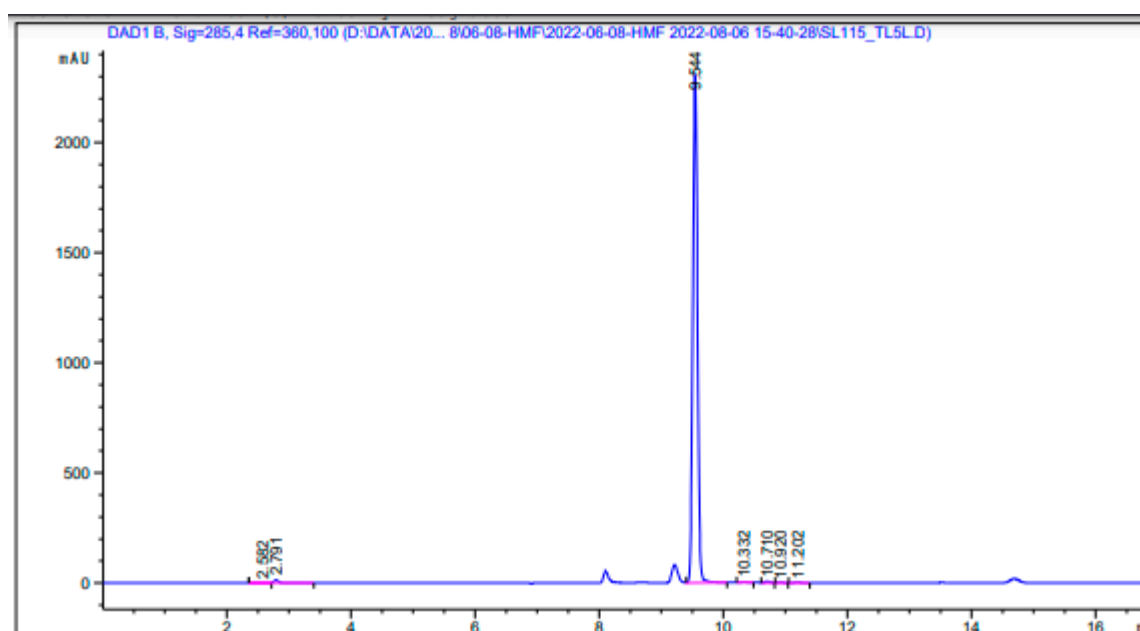

External Standard Report

Sorted By : Signal  
 Calib. Data Modified : 8/5/2022 1:49:08 AM  
 Multiplier : 1.0000  
 Dilution : 1.0000  
 Do not use Multiplier & Dilution Factor with ISTDs

Signal 1: DAD1 B, Sig=285,4 Ref=360,100

| RetTime<br>[min] | Type | Area<br>[mAU*s] | Amt/Area   | Amount<br>[ppm] | Grp | Name           |
|------------------|------|-----------------|------------|-----------------|-----|----------------|
| 8.900            | -    | -               | -          | -               | -   | Levulinic acid |
| 9.544            | VB   | 1.20805e4       | 9.61642e-3 | 116.17151       |     | HMF            |
| 10.332           | BB   | 14.73751        | 3.23053e-2 | 4.76100e-1      |     | DFF            |
| 10.920           | BB   | 5.54461         | 0.00000    | 0.00000         |     | FDCA           |
| 11.202           | BB   | 7.82974         | 0.00000    | 0.00000         |     | Furfural       |

**Figure S4. 65:** HPLC chromatography of HMF. Reaction condntion: Fructose (1 mmol), DES 1 (5 mmol), 80 °C, 60 min.

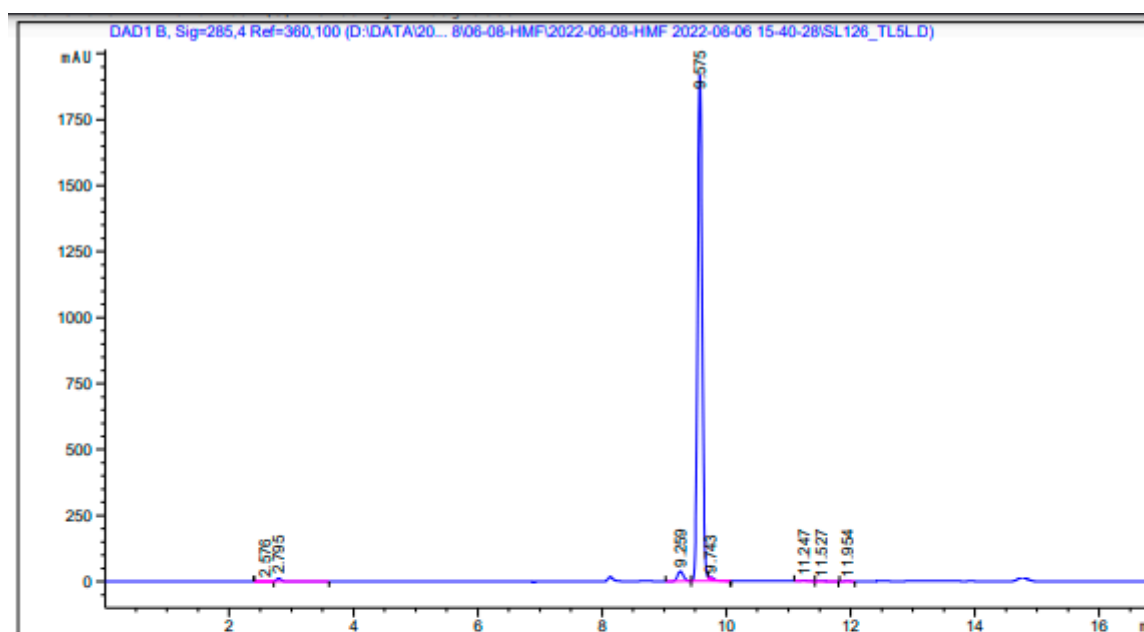

External Standard Report

Sorted By : Signal  
 Calib. Data Modified : 8/5/2022 1:49:08 AM  
 Multiplier : 1.0000  
 Dilution : 1.0000  
 Do not use Multiplier & Dilution Factor with ISTDs

Signal 1: DAD1 B, Sig=285,4 Ref=360,100

| RetTime<br>[min] | Type | Area<br>[mAU*s] | Amt/Area   | Amount<br>[ppm] | Grp      | Name           |
|------------------|------|-----------------|------------|-----------------|----------|----------------|
| 8.900            | -    | -               | -          | -               | -        | Levulinic acid |
| 9.575            | VV R | 9920.37988      | 9.60924e-3 | 95.32727        | HMF      |                |
| 10.201           | -    | -               | -          | -               | -        | DFF            |
| 11.097           | -    | -               | -          | -               | -        | FDCA           |
| 11.247           | BV   | 19.35286        | 0.00000    | 0.00000         | Furfural |                |

**Figure S4. 66:** HPLC chromatography of HMF. Reaction condition: Fructose (1 mmol), DES 1 (5 mmol), 120 °C, 5 min.



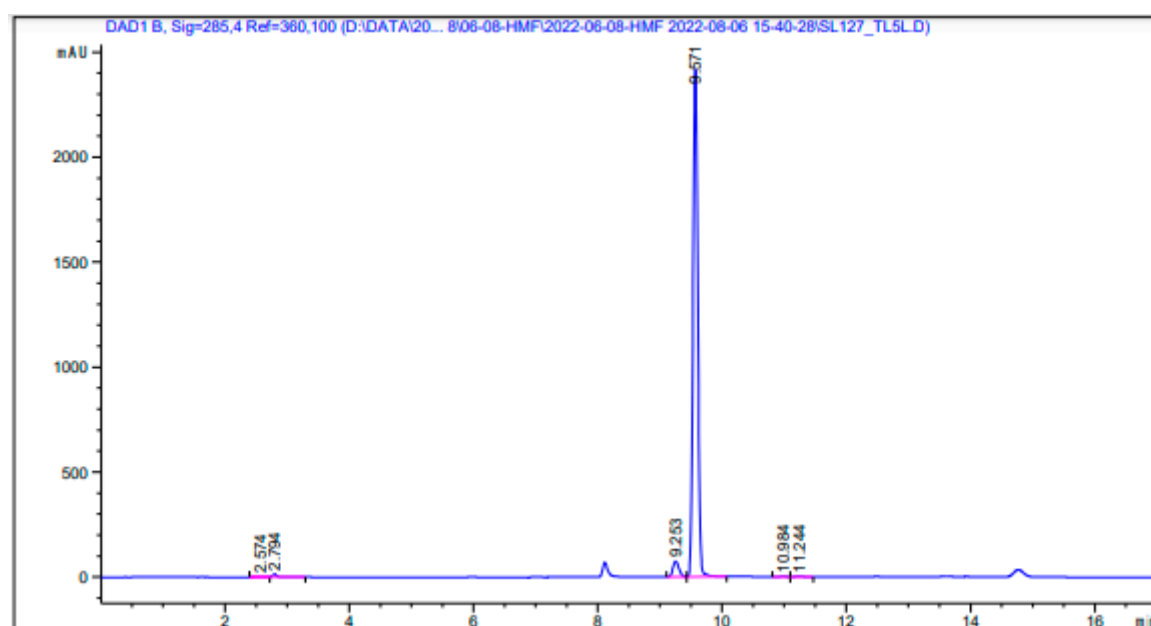

External Standard Report

Sorted By : Signal  
 Calib. Data Modified : 8/5/2022 1:49:08 AM  
 Multiplier : 1.0000  
 Dilution : 1.0000  
 Do not use Multiplier & Dilution Factor with ISTDs

Signal 1: DAD1 B, Sig=285,4 Ref=360,100

| RetTime<br>[min] | Type | Area<br>[mAU*s] | Amt/Area   | Amount<br>[ppm] | Grp | Name           |
|------------------|------|-----------------|------------|-----------------|-----|----------------|
| 8.900            | -    | -               | -          | -               | -   | Levulinic acid |
| 9.571            | VB   | 1.28694e4       | 9.61844e-3 | 123.78348       | -   | HMF            |
| 10.201           | -    | -               | -          | -               | -   | DFF            |
| 10.984           | BV   | 13.60453        | 0.00000    | 0.00000         | -   | FDCA           |
| 11.244           | VB   | 19.63445        | 0.00000    | 0.00000         | -   | Furfural       |

**Figure S4. 67:** HPLC chromatography of HMF. Reaction condition: Fructose (1 mmol), DES 1 (5 mmol), 120 °C, 10 min.

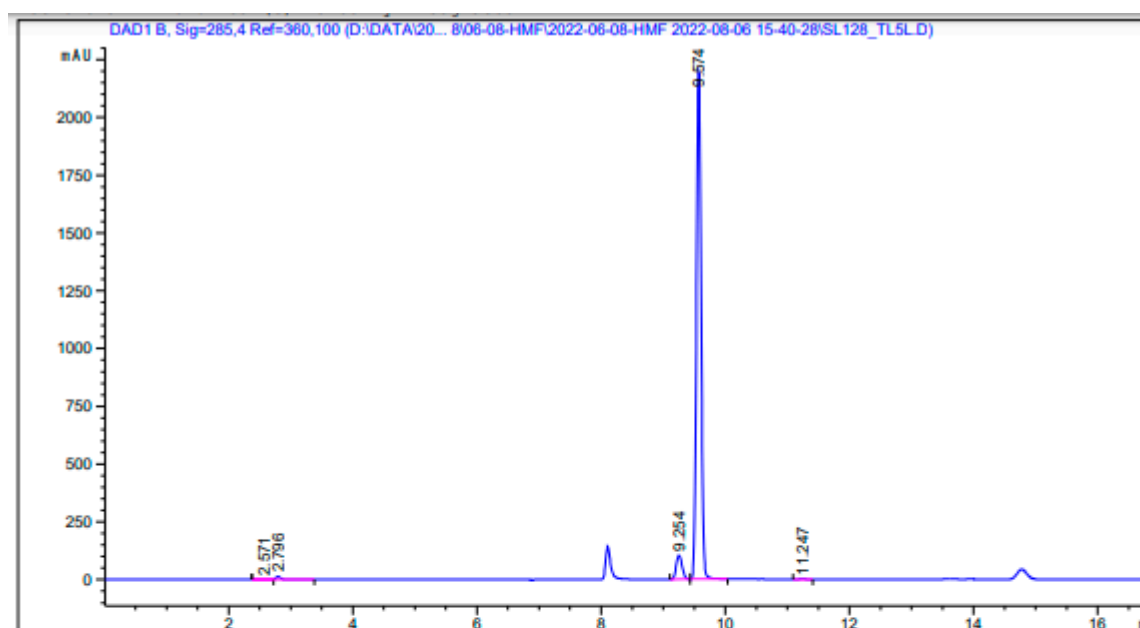

#### External Standard Report

Sorted By : Signal  
 Calib. Data Modified : 8/5/2022 1:49:08 AM  
 Multiplier : 1.0000  
 Dilution : 1.0000  
 Do not use Multiplier & Dilution Factor with ISTDs

Signal 1: DAD1 B, Sig=285,4 Ref=360,100

| RetTime<br>[min] | Type | Area<br>[mAU*s] | Amt/Area   | Amount<br>[ppm] | Grp      | Name           |
|------------------|------|-----------------|------------|-----------------|----------|----------------|
| 8.900            | -    | -               | -          | -               | -        | Levulinic acid |
| 9.574            | BB   | 1.14555e4       | 9.61462e-3 | 110.14074       | HMF      |                |
| 10.201           | -    | -               | -          | -               | -        | DFF            |
| 11.097           | -    | -               | -          | -               | -        | FDCA           |
| 11.247           | BB   | 11.02428        | 0.00000    | 0.00000         | Furfural |                |

**Figure S4. 68:** HPLC chromatography of HMF. Reaction condition: Fructose (1 mmol), DES 1 (5 mmol), 120 °C, 20 min.

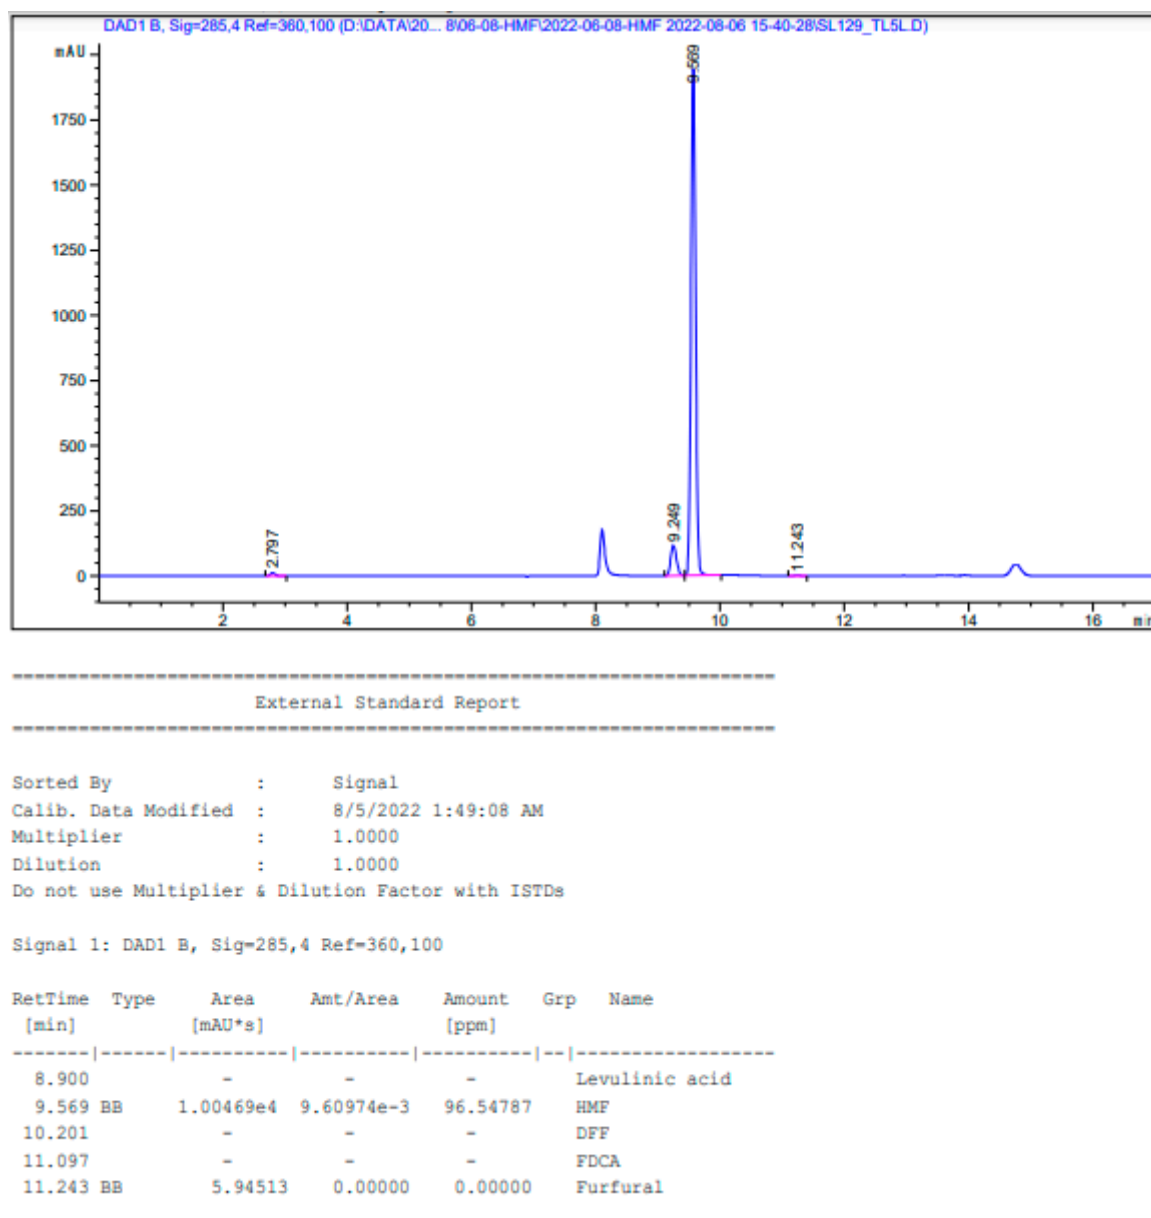

**Figure S4. 69:** HPLC chromatography of HMF. Reaction condition: Fructose (1 mmol), DES 1 (5 mmol), 120 °C, 30 min.

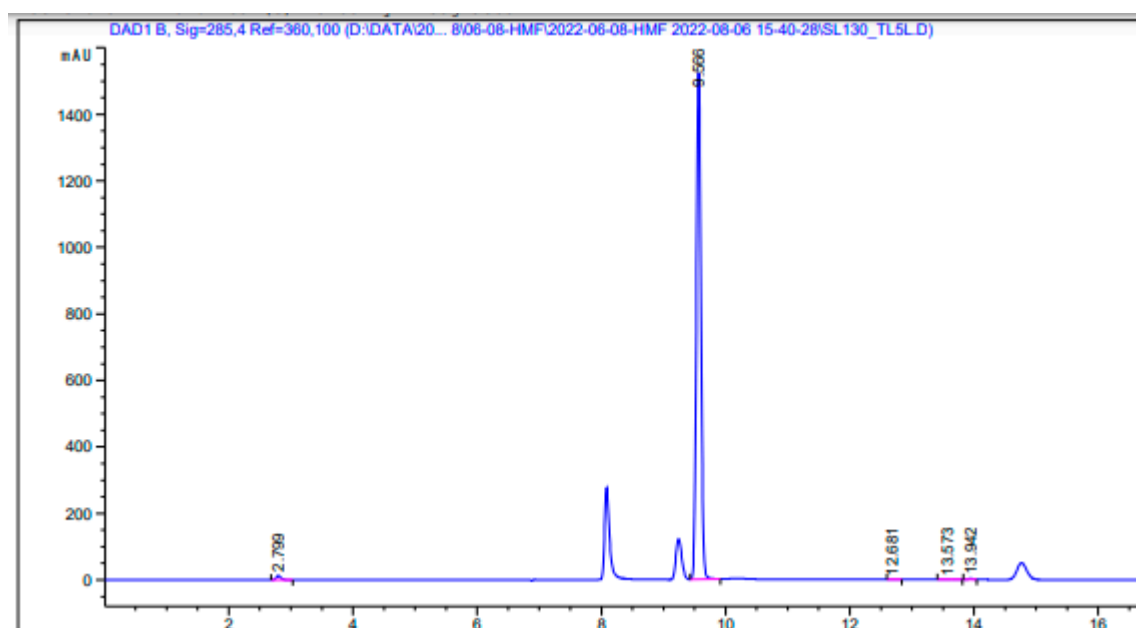

#### External Standard Report

Sorted By : Signal  
 Calib. Data Modified : 8/5/2022 1:49:08 AM  
 Multiplier : 1.0000  
 Dilution : 1.0000  
 Do not use Multiplier & Dilution Factor with ISTDs

Signal 1: DAD1 B, Sig=285,4 Ref=360,100

| RetTime<br>[min] | Type | Area<br>[mAU*s] | Amt/Area   | Amount<br>[ppm] | Grp | Name           |
|------------------|------|-----------------|------------|-----------------|-----|----------------|
| 8.900            | -    | -               | -          | -               | -   | Levulinic acid |
| 9.566            | BB   | 7798.87598      | 9.59831e-3 | 74.85601        | -   | HMF            |
| 10.201           | -    | -               | -          | -               | -   | DFF            |
| 11.097           | -    | -               | -          | -               | -   | FDCA           |
| 11.300           | -    | -               | -          | -               | -   | Furfural       |

**Figure S4. 70:** HPLC chromatography of HMF. Reaction condition: Fructose (1 mmol), DES 1 (5 mmol), 120 °C, 60 min.

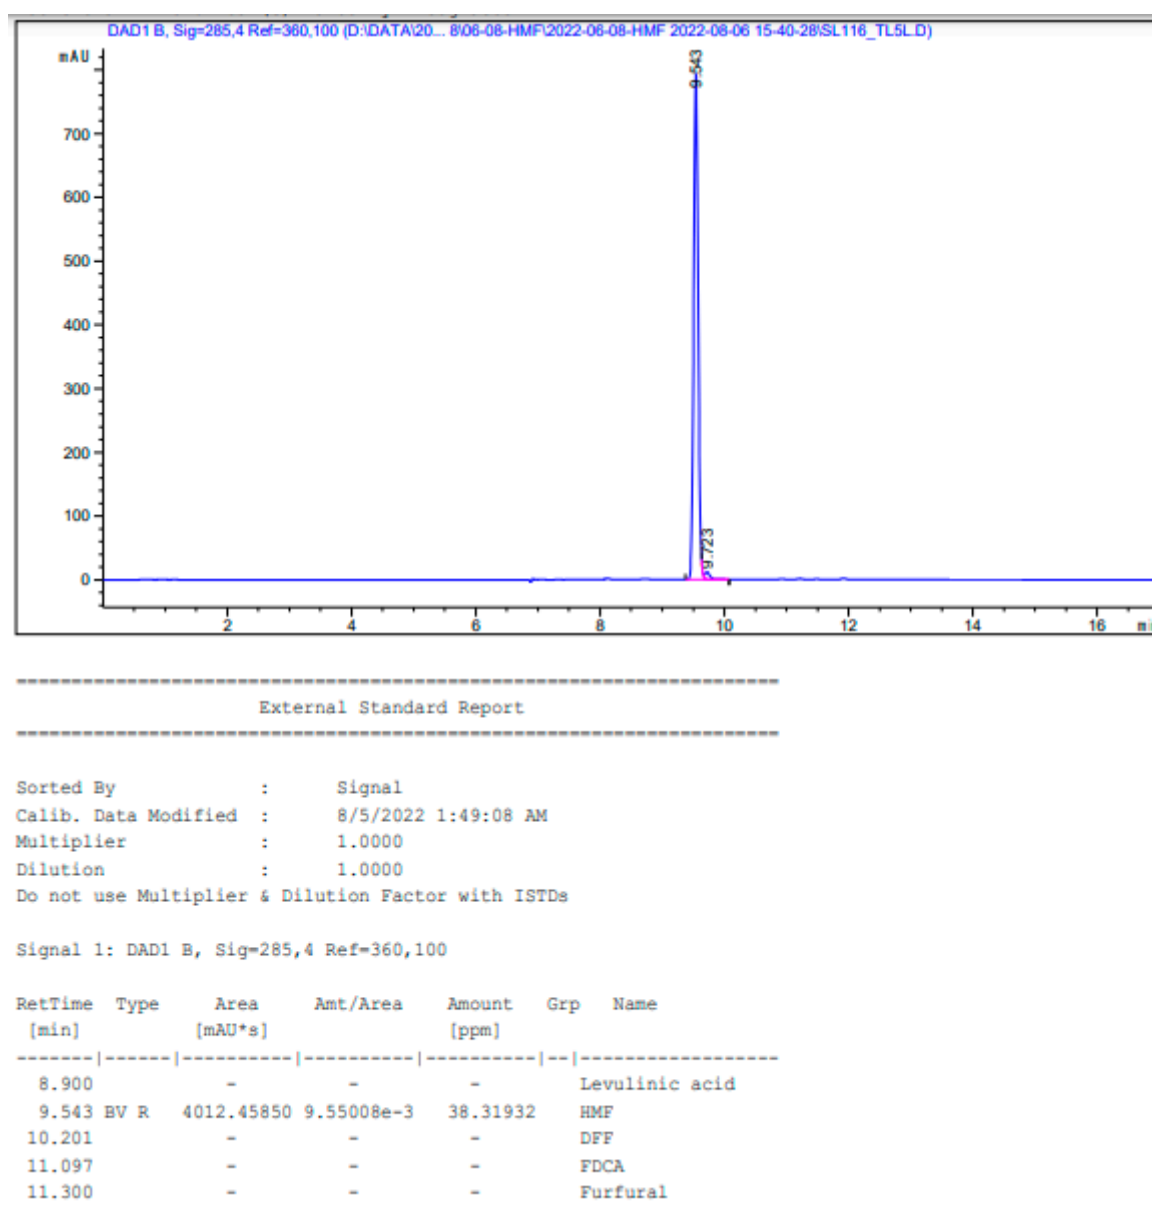

**Figure S4. 71:** HPLC chromatography of HMF. Reaction condtion: Fructose (1 mmol), DES 2 (5 mmol), 80 °C, 5 min.

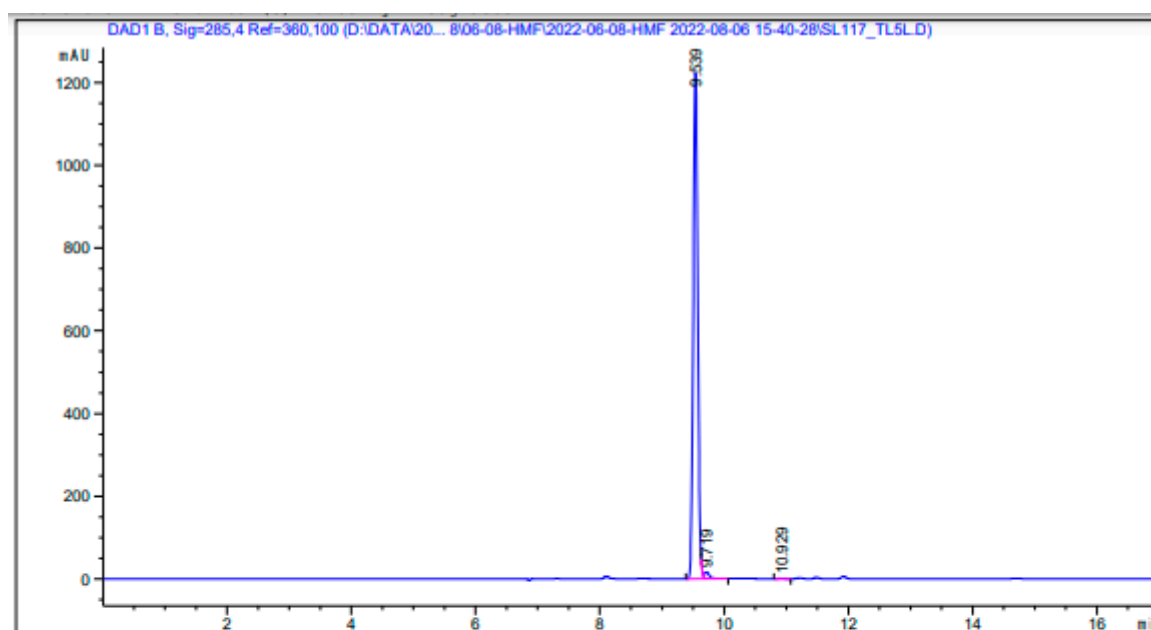

External Standard Report

Sorted By : Signal  
 Calib. Data Modified : 8/5/2022 1:49:08 AM  
 Multiplier : 1.0000  
 Dilution : 1.0000  
 Do not use Multiplier & Dilution Factor with ISTDs

Signal 1: DAD1 B, Sig=285,4 Ref=360,100

| RetTime<br>[min] | Type | Area<br>[mAU*s] | Amt/Area   | Amount<br>[ppm] | Grp  | Name           |
|------------------|------|-----------------|------------|-----------------|------|----------------|
| 8.900            | -    | -               | -          | -               | -    | Levulinic acid |
| 9.539            | BV R | 6218.55078      | 9.58532e-3 | 59.60680        | HMF  |                |
| 10.201           | -    | -               | -          | -               | -    | DFF            |
| 10.929           | BB   | 5.39169         | 0.00000    | 0.00000         | FDCA |                |
| 11.300           | -    | -               | -          | -               | -    | Furfural       |

**Figure S4. 72:** HPLC chromatography of HMF. Reaction condition: Fructose (1 mmol), DES 2 (5 mmol), 80 °C, 10 min.

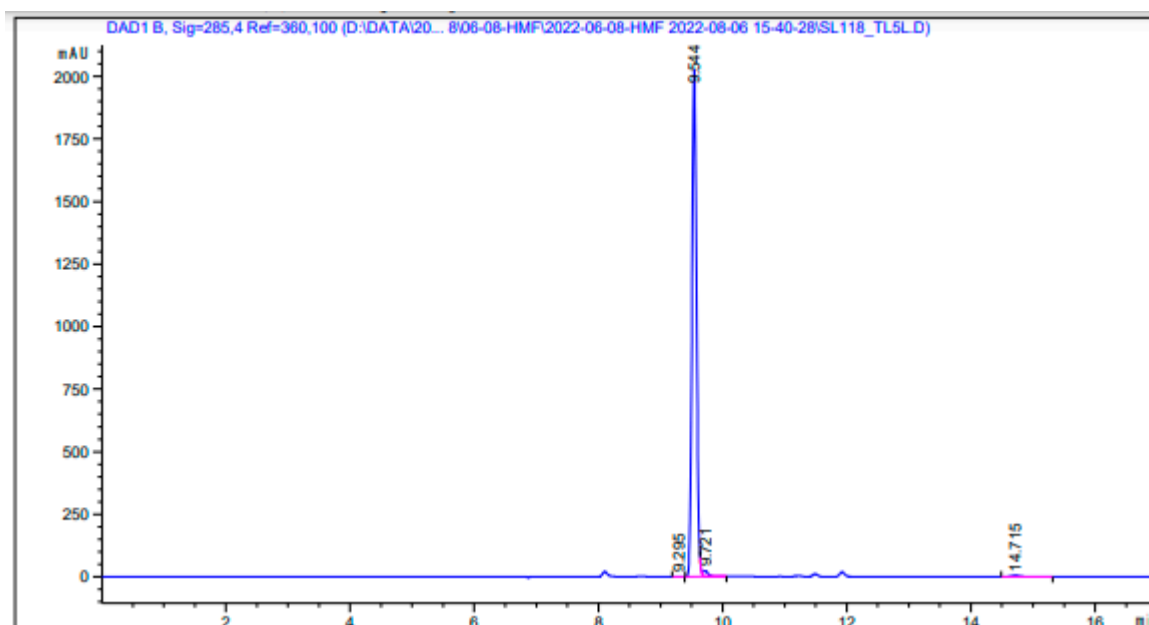

External Standard Report

Sorted By : Signal  
 Calib. Data Modified : 8/5/2022 1:49:08 AM  
 Multiplier : 1.0000  
 Dilution : 1.0000  
 Do not use Multiplier & Dilution Factor with ISTDs

Signal 1: DAD1 B, Sig=285,4 Ref=360,100

| RetTime<br>[min] | Type | Area<br>[mAU*s] | Amt/Area   | Amount<br>[ppm] | Grp | Name           |
|------------------|------|-----------------|------------|-----------------|-----|----------------|
| 8.900            | -    | -               | -          | -               | -   | Levulinic acid |
| 9.544            | BV R | 1.03861e4       | 9.61104e-3 | 99.82160        | -   | HMF            |
| 10.201           | -    | -               | -          | -               | -   | DFF            |
| 11.097           | -    | -               | -          | -               | -   | FDCA           |
| 11.300           | -    | -               | -          | -               | -   | Furfural       |

**Figure S4. 73:** HPLC chromatography of HMF. Reaction condition: Fructose (1 mmol), DES 2 (5 mmol), 80 °C, 20 min.

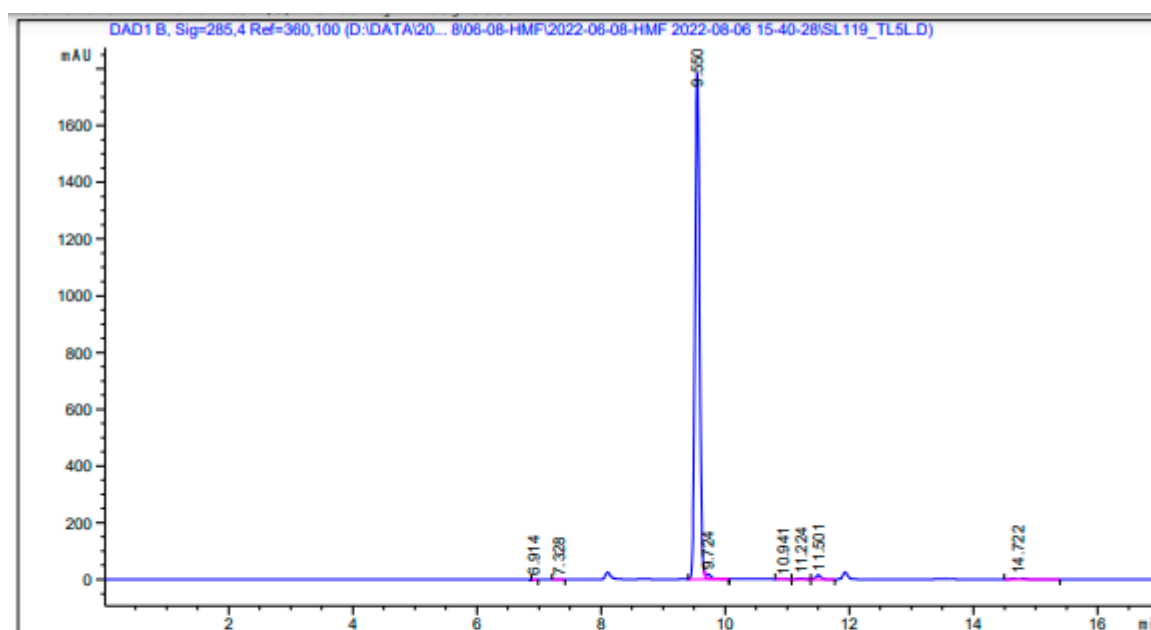

#### External Standard Report

Sorted By : Signal  
 Calib. Data Modified : 8/5/2022 1:49:08 AM  
 Multiplier : 1.0000  
 Dilution : 1.0000  
 Do not use Multiplier & Dilution Factor with ISTDs

Signal 1: DAD1 B, Sig=285,4 Ref=360,100

| RetTime<br>[min] | Type | Area<br>[mAU*s] | Amt/Area   | Amount<br>[ppm] | Grp      | Name           |
|------------------|------|-----------------|------------|-----------------|----------|----------------|
| 8.900            | -    | -               | -          | -               | -        | Levulinic acid |
| 9.550            | VV R | 9129.35352      | 9.60575e-3 | 87.69433        | HMF      |                |
| 10.201           | -    | -               | -          | -               | -        | DFF            |
| 10.941           | BB   | 4.96607         | 0.00000    | 0.00000         | FDCA     |                |
| 11.224           | BV   | 22.69624        | 0.00000    | 0.00000         | Furfural |                |

**Figure S4. 74:** HPLC chromatography of HMF. Reaction condition: Fructose (1 mmol), DES 2 (5 mmol), 80 °C, 30 min.



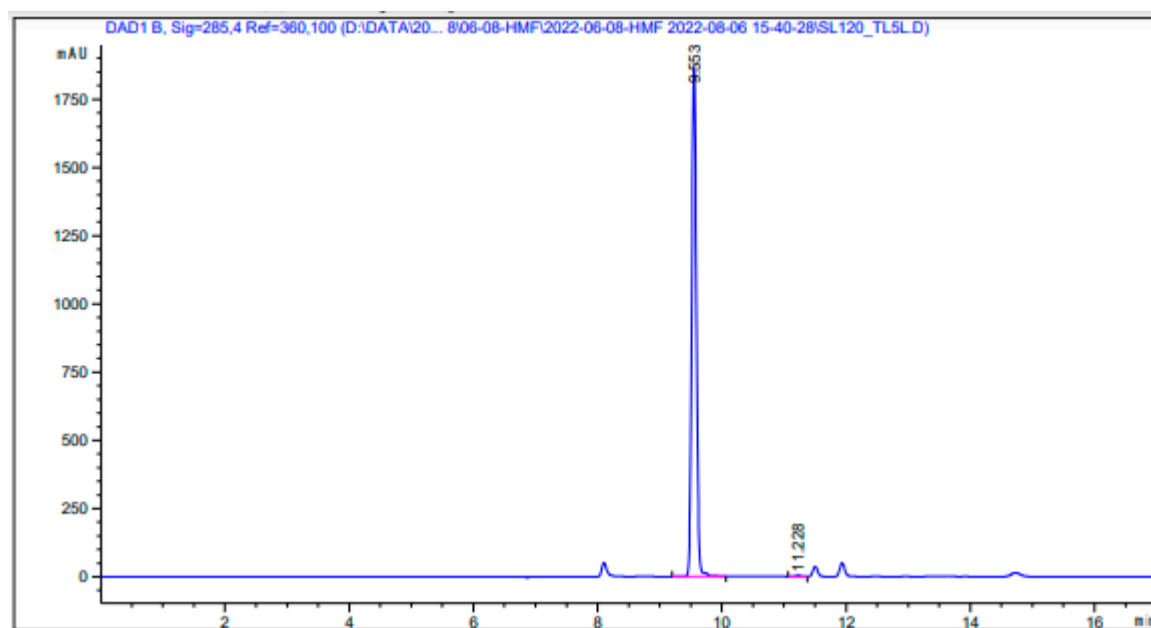

External Standard Report

Sorted By : Signal  
 Calib. Data Modified : 8/5/2022 1:49:08 AM  
 Multiplier : 1.0000  
 Dilution : 1.0000  
 Do not use Multiplier & Dilution Factor with ISTDs

Signal 1: DAD1 B, Sig=285,4 Ref=360,100

| RetTime<br>[min] | Type | Area<br>[mAU*s] | Amt/Area   | Amount<br>[ppm] | Grp | Name           |
|------------------|------|-----------------|------------|-----------------|-----|----------------|
| 8.900            |      | -               | -          | -               |     | Levulinic acid |
| 9.553            | VB R | 9647.13867      | 9.60810e-3 | 92.69065        |     | HMF            |
| 10.201           |      | -               | -          | -               |     | DFF            |
| 11.097           |      | -               | -          | -               |     | FDCA           |
| 11.228           | BV   | 26.73737        | 8.69838e-4 | 2.32572e-2      |     | Furfural       |

**Figure S4. 75:** HPLC chromatography of HMF. Reaction condition: Fructose (1 mmol), DES 2 (5 mmol), 80 °C, 60 min.

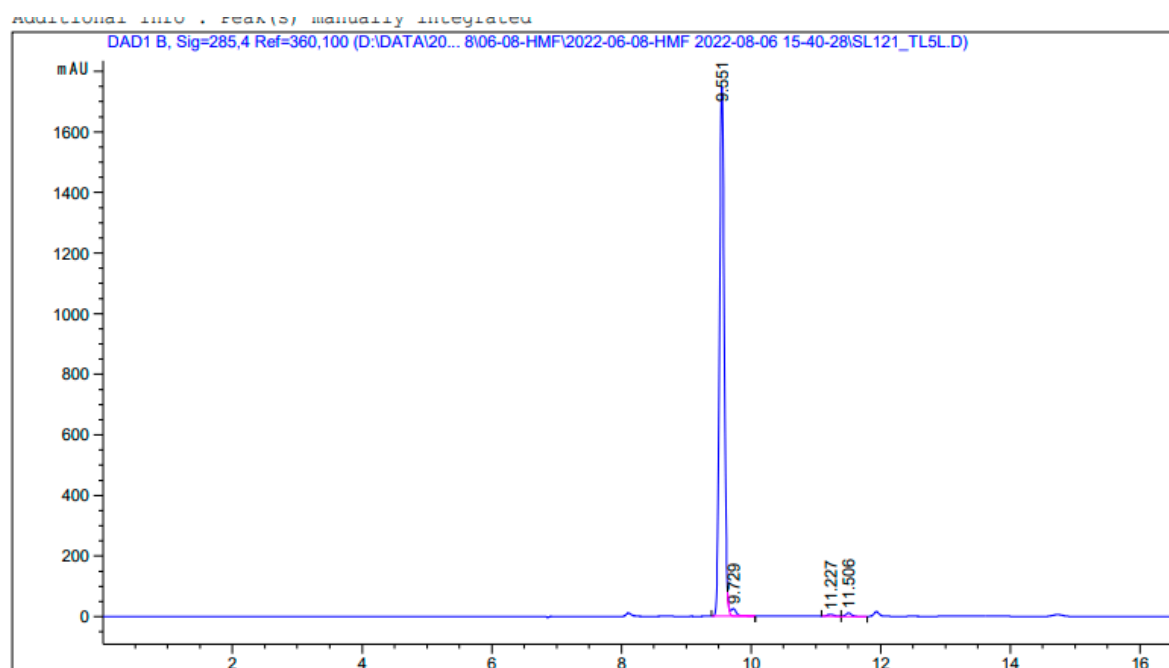

External Standard Report

Sorted By : Signal  
 Calib. Data Modified : 8/5/2022 1:49:08 AM  
 Multiplier : 1.0000  
 Dilution : 1.0000  
 Do not use Multiplier & Dilution Factor with ISTDs

Signal 1: DAD1 B, Sig=285,4 Ref=360,100

| RetTime<br>[min] | Type | Area<br>[mAU*s] | Amt/Area   | Amount<br>[ppm] | Grp | Name           |
|------------------|------|-----------------|------------|-----------------|-----|----------------|
| 8.900            | -    | -               | -          | -               | -   | Levulinic acid |
| 9.551            | VV R | 8978.54102      | 9.60502e-3 | 86.23908        | -   | HMF            |
| 10.201           | -    | -               | -          | -               | -   | DFF            |
| 11.097           | -    | -               | -          | -               | -   | FDCA           |
| 11.227           | BV   | 45.71900        | 4.74997e-3 | 2.17164e-1      | -   | Furfural       |

**Figure S4. 76:** HPLC chromatography of HMF. Reaction condition: Fructose (1 mmol), DES 2 (5 mmol), 120 °C, 5 min.

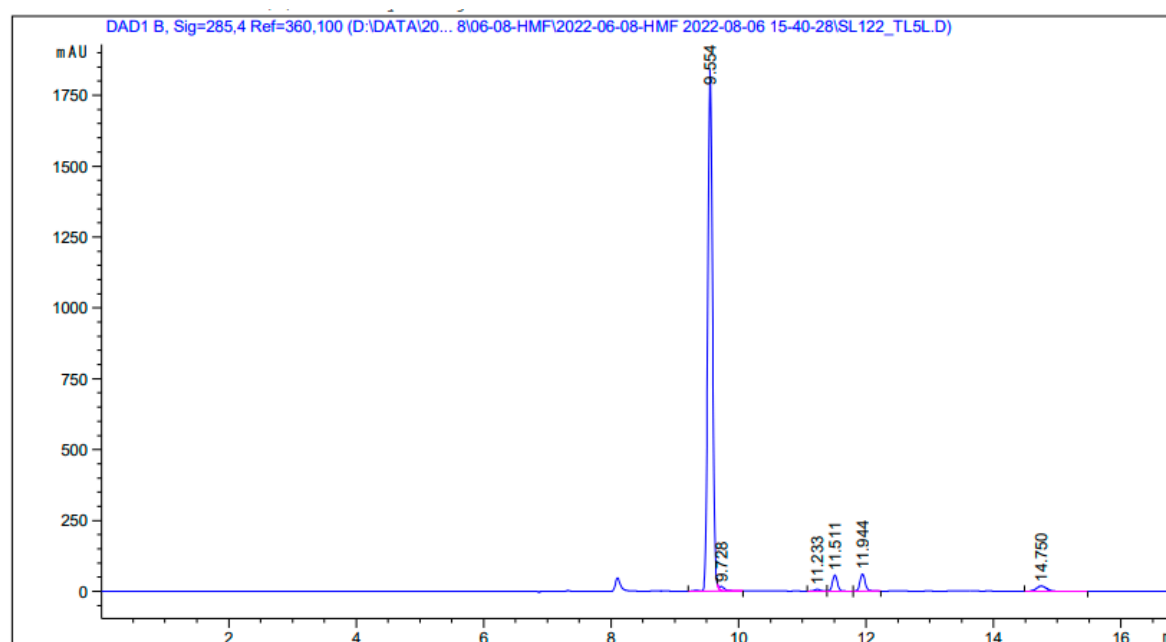

External Standard Report

Sorted By : Signal  
 Calib. Data Modified : 8/5/2022 1:49:08 AM  
 Multiplier : 1.0000  
 Dilution : 1.0000  
 Do not use Multiplier & Dilution Factor with ISTDs

Signal 1: DAD1 B, Sig=285,4 Ref=360,100

| RetTime<br>[min] | Type | Area<br>[mAU*s] | Amt/Area   | Amount<br>[ppm] | Grp | Name           |
|------------------|------|-----------------|------------|-----------------|-----|----------------|
| 8.900            |      | -               | -          | -               |     | Levulinic acid |
| 9.554            | VV R | 9461.81055      | 9.60729e-3 | 90.90234        |     | HMF            |
| 10.201           |      | -               | -          | -               |     | DFF            |
| 11.097           |      | -               | -          | -               |     | FDCA           |
| 11.233           | BV   | 41.30664        | 4.16615e-3 | 1.72090e-1      |     | Furfural       |

**Figure S4. 77:** HPLC chromatography of HMF. Reaction condition: Fructose (1 mmol), DES 2 (5 mmol), 120 °C, 10 min.

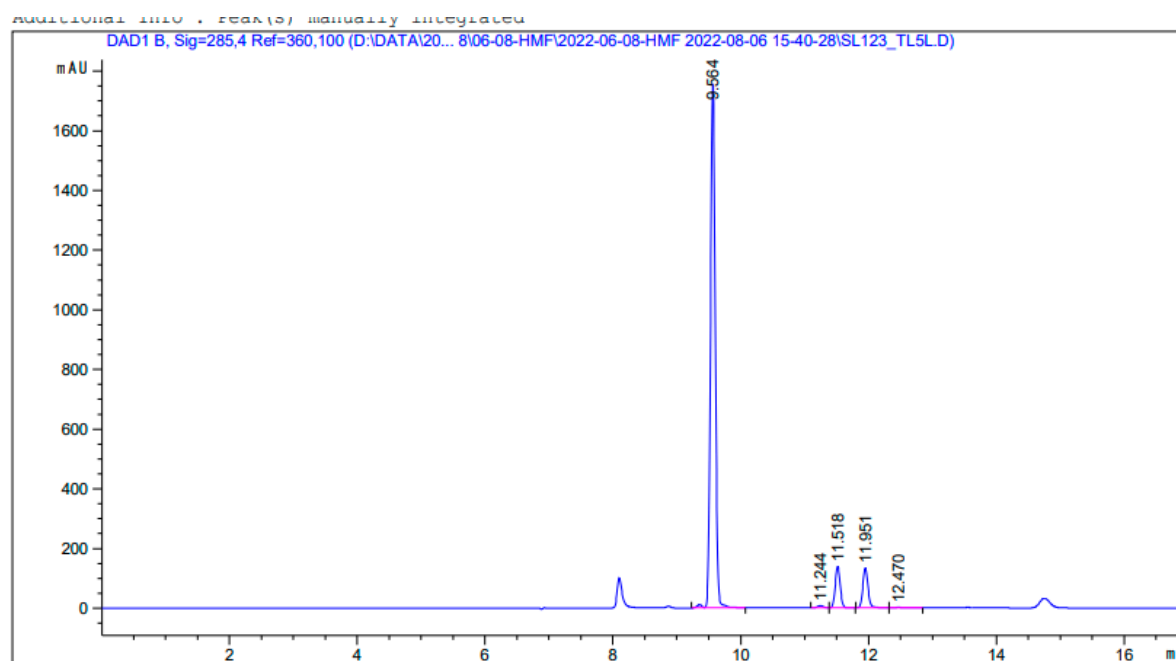

External Standard Report

Sorted By : Signal  
 Calib. Data Modified : 8/5/2022 1:49:08 AM  
 Multiplier : 1.0000  
 Dilution : 1.0000  
 Do not use Multiplier & Dilution Factor with ISTDs

Signal 1: DAD1 B, Sig=285,4 Ref=360,100

| RetTime<br>[min] | Type | Area<br>[mAU*s] | Amt/Area   | Amount<br>[ppm] | Grp | Name           |
|------------------|------|-----------------|------------|-----------------|-----|----------------|
| 8.900            | -    | -               | -          | -               | -   | Levulinic acid |
| 9.564            | VB R | 9100.50293      | 9.60562e-3 | 87.41594        | -   | HMF            |
| 10.201           | -    | -               | -          | -               | -   | DFF            |
| 11.097           | -    | -               | -          | -               | -   | FDCA           |
| 11.244           | BV   | 48.74539        | 5.08930e-3 | 2.48080e-1      | -   | Furfural       |

**Figure S4. 78:** HPLC chromatography of HMF. Reaction condition: Fructose (1 mmol), DES 2 (5 mmol), 120 °C, 20 min.

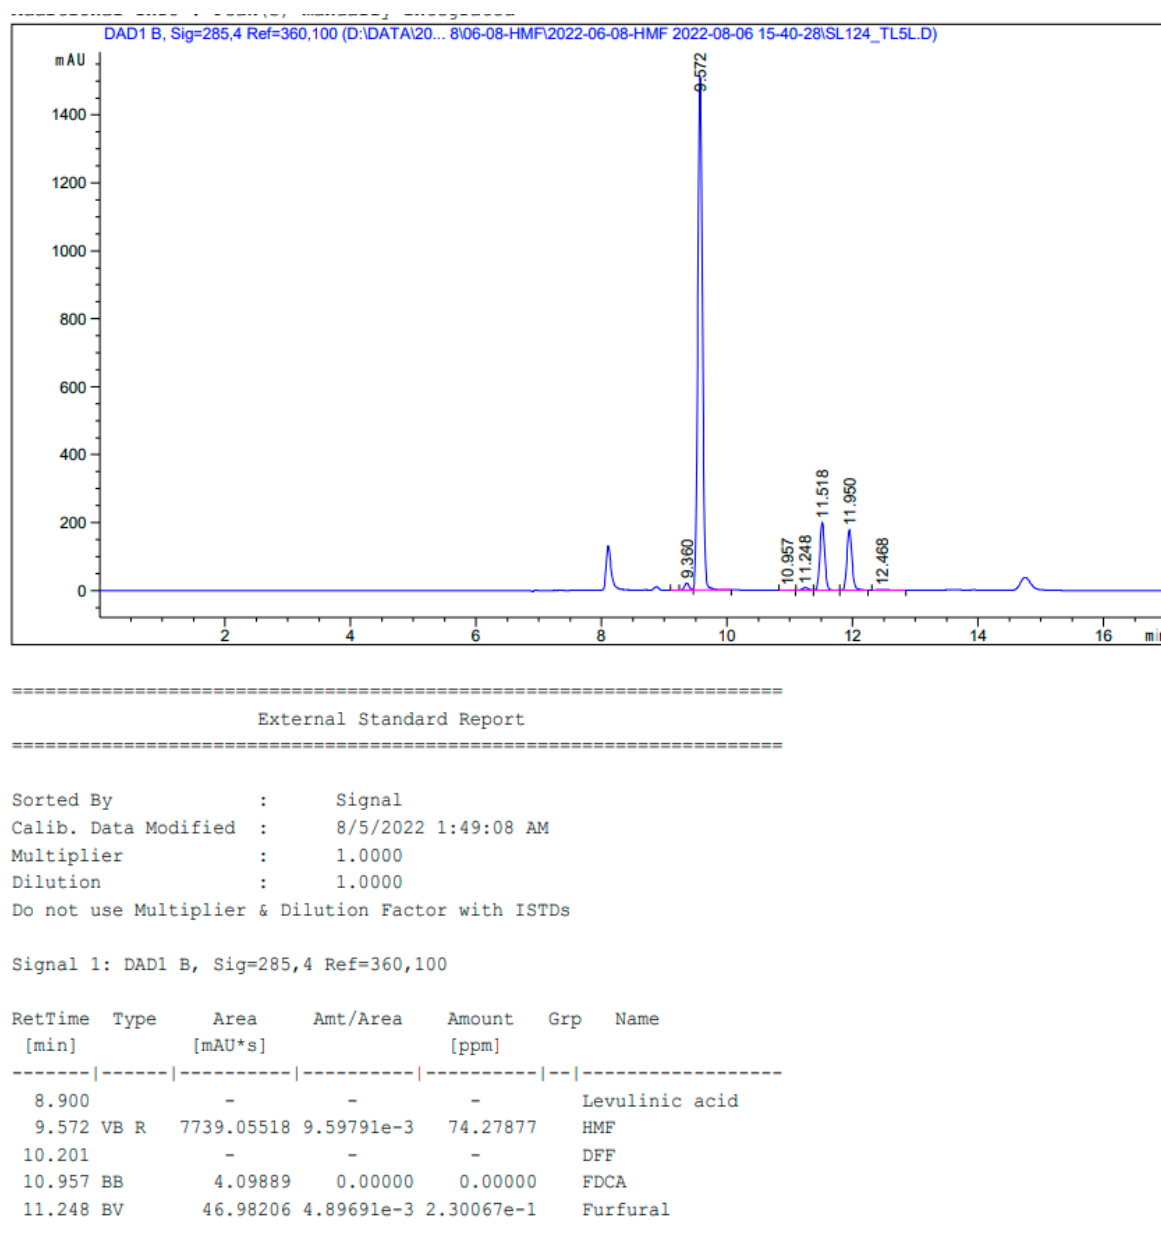

**Figure S4. 79:** HPLC chromatography of HMF. Reaction condition: Fructose (1 mmol), DES 2 (5 mmol), 120 °C, 30 min.

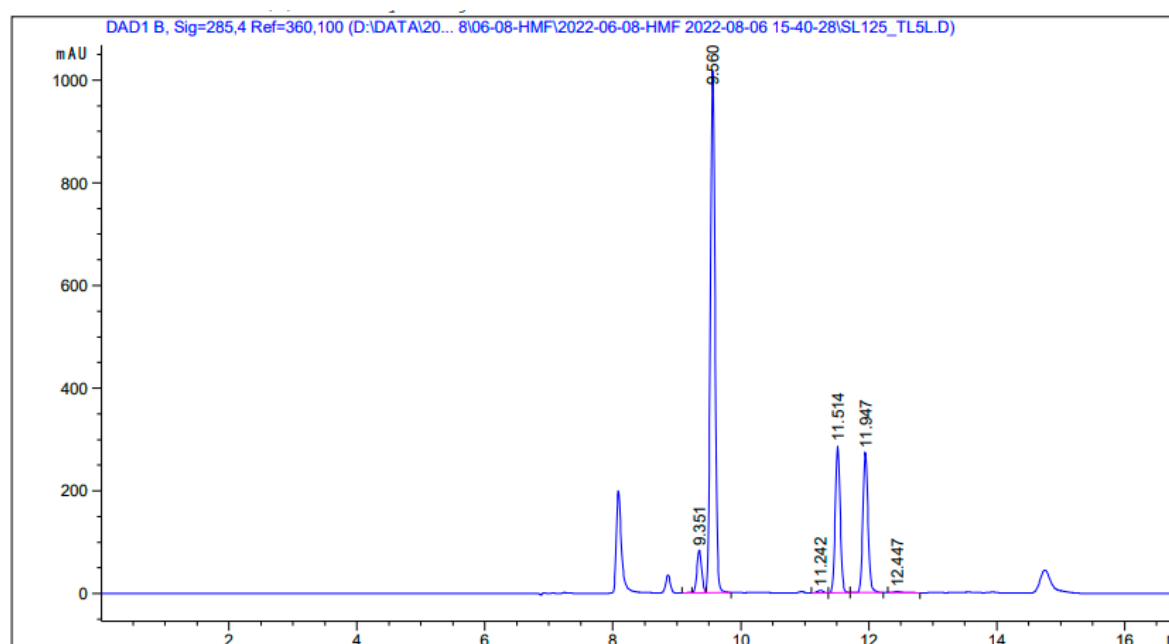

=====  
 External Standard Report  
 =====

Sorted By : Signal  
 Calib. Data Modified : 8/5/2022 1:49:08 AM  
 Multiplier : 1.0000  
 Dilution : 1.0000  
 Do not use Multiplier & Dilution Factor with ISTDs

Signal 1: DAD1 B, Sig=285,4 Ref=360,100

| RetTime<br>[min] | Type | Area<br>[mAU*s] | Amt/Area   | Amount<br>[ppm] | Grp | Name           |
|------------------|------|-----------------|------------|-----------------|-----|----------------|
| 8.900            | -    | -               | -          | -               | -   | Levulinic acid |
| 9.560            | VB R | 5204.16455      | 9.57283e-3 | 49.81857        | -   | HMF            |
| 10.201           | -    | -               | -          | -               | -   | DFF            |
| 11.097           | -    | -               | -          | -               | -   | FDCA           |
| 11.242           | BB   | 30.24692        | 1.95422e-3 | 5.91090e-2      | -   | Furfural       |

**Figure S4. 80:** HPLC chromatography of HMF. Reaction condition: Fructose (1 mmol), DES 2 (5 mmol), 120 °C, 60 min.

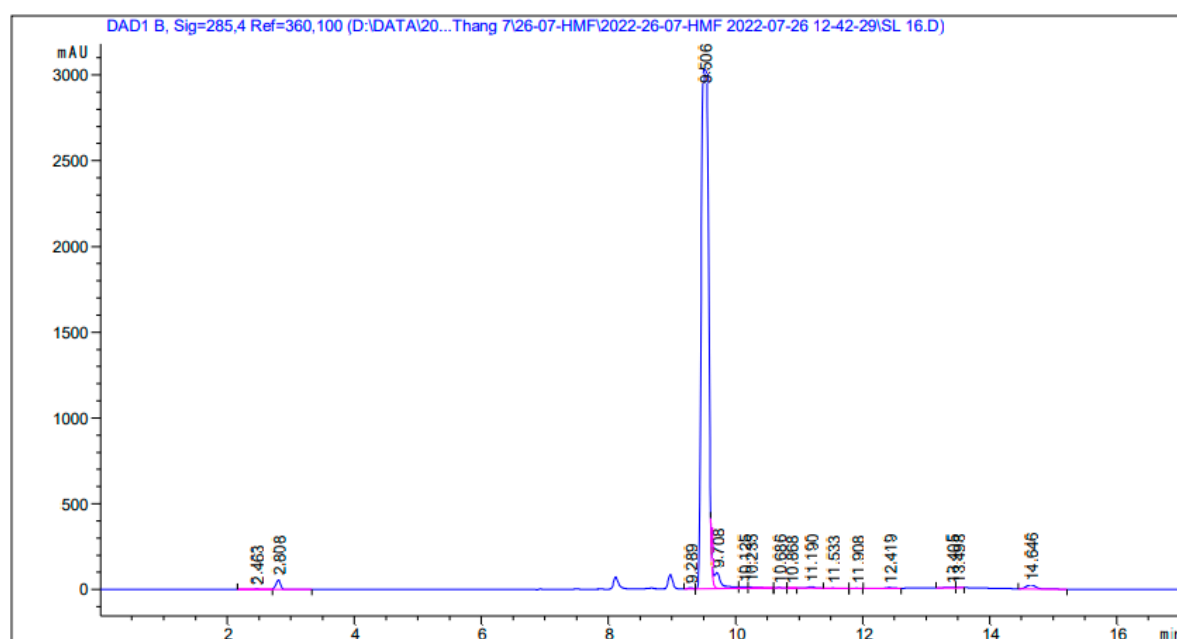

External Standard Report

Sorted By : Signal  
 Calib. Data Modified : 6/18/2022 1:43:53 AM  
 Multiplier : 1.0000  
 Dilution : 1.0000  
 Do not use Multiplier & Dilution Factor with ISTDs

Signal 1: DAD1 B, Sig=285,4 Ref=360,100

| RetTime<br>[min] | Type | Area<br>[mAU*s] | Amt/Area   | Amount<br>[ppm] | Grp | Name           |
|------------------|------|-----------------|------------|-----------------|-----|----------------|
| 8.900            | -    | -               | -          | -               | -   | Levulinic acid |
| 9.506            | BV R | 2.41710e4       | 9.63292e-3 | 232.83735       |     | HMF            |
| 10.686           | BV   | 13.37472        | 3.45371e-2 | 4.61925e-1      |     | DFF            |
| 11.190           | VV R | 67.00442        | 0.00000    | 0.00000         |     | FDCA           |
| 11.533           | VV E | 12.37573        | 0.00000    | 0.00000         |     | Furfural       |

**Figure S4. 81:** HPLC chromatography of HMF. Reaction condition: Fructose (1 mmol), DES 1 (1 mmol), 100 °C, 5 min.

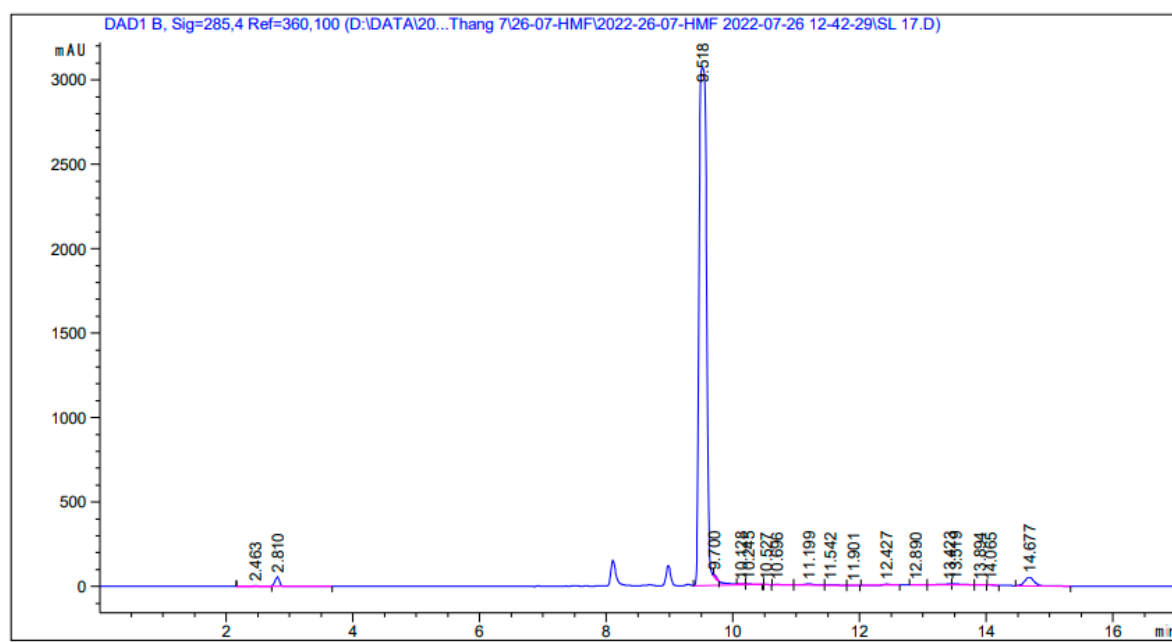

External Standard Report

Sorted By : Signal  
 Calib. Data Modified : 6/18/2022 1:43:53 AM  
 Multiplier : 1.0000  
 Dilution : 1.0000  
 Do not use Multiplier & Dilution Factor with ISTDs

Signal 1: DAD1 B, Sig=285,4 Ref=360,100

| RetTime<br>[min] | Type | Area<br>[mAU*s] | Amt/Area   | Amount<br>[ppm] | Grp | Name           |
|------------------|------|-----------------|------------|-----------------|-----|----------------|
| 8.900            | -    | -               | -          | -               | -   | Levulinic acid |
| 9.518            | BV R | 2.52909e4       | 9.63365e-3 | 243.64371       | -   | HMF            |
| 10.527           | BB   | 2.67788         | 1.30946e-1 | 3.50658e-1      | -   | DFF            |
| 11.097           | -    | -               | -          | -               | -   | FDCA           |
| 11.199           | BV   | 68.98654        | 6.59337e-3 | 4.54854e-1      | -   | Furfural       |

**Figure S4. 82:** HPLC chromatography of HMF. Reaction condition: Fructose (1 mmol), DES 1 (1 mmol), 100 °C, 10 min.



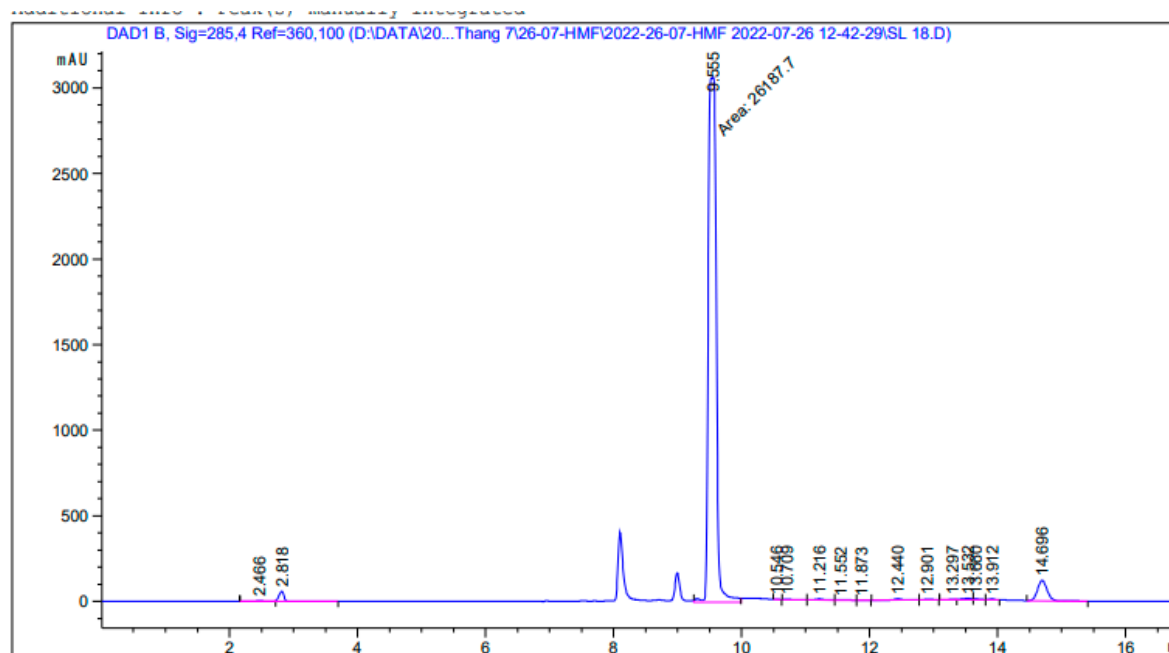

External Standard Report

Sorted By : Signal  
 Calib. Data Modified : 6/18/2022 1:43:53 AM  
 Multiplier : 1.0000  
 Dilution : 1.0000  
 Do not use Multiplier & Dilution Factor with ISTDs

Signal 1: DAD1 B, Sig=285,4 Ref=360,100

| RetTime<br>[min] | Type | Area<br>[mAU*s] | Amt/Area   | Amount<br>[ppm] | Grp | Name           |
|------------------|------|-----------------|------------|-----------------|-----|----------------|
| 8.900            |      | -               | -          | -               |     | Levulinic acid |
| 9.555            | MM   | 2.61877e4       | 9.63419e-3 | 252.29744       |     | HMF            |
| 10.546           | BB   | 5.05104         | 7.43100e-2 | 3.75343e-1      |     | DFF            |
| 11.097           |      | -               | -          | -               |     | FDCA           |
| 11.216           | VV   | 57.56285        | 5.87453e-3 | 3.38155e-1      |     | Furfural       |

Totals : 253.01094

**Figure S4. 83:** HPLC chromatography of HMF. Reaction condition: Fructose (1 mmol), DES 1 (1 mmol), 100 °C, 20 min.

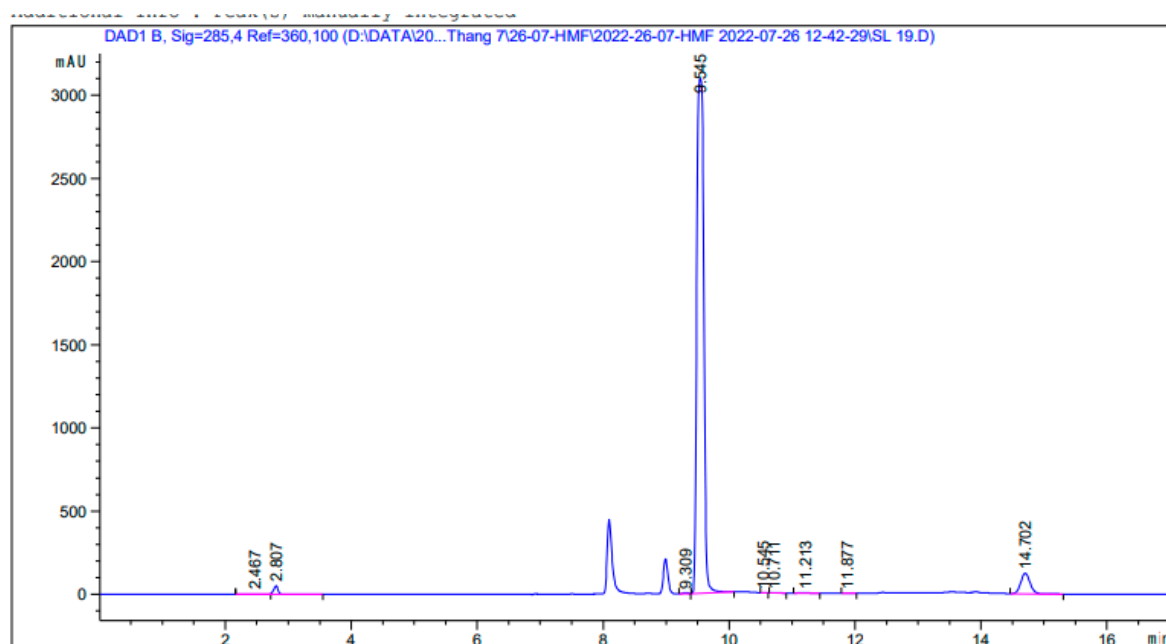

External Standard Report

Sorted By : Signal  
 Calib. Data Modified : 6/18/2022 1:43:53 AM  
 Multiplier : 1.0000  
 Dilution : 1.0000  
 Do not use Multiplier & Dilution Factor with ISTDs

Signal 1: DAD1 B, Sig=285,4 Ref=360,100

| RetTime<br>[min] | Type | Area<br>[mAU*s] | Amt/Area   | Amount<br>[ppm] | Grp | Name           |
|------------------|------|-----------------|------------|-----------------|-----|----------------|
| 8.900            |      | -               | -          | -               |     | Levulinic acid |
| 9.545            | BB   | 2.35692e4       | 9.63250e-3 | 227.03012       |     | HMF            |
| 10.545           | BB   | 3.55043         | 1.01321e-1 | 3.59734e-1      |     | DFF            |
| 11.097           |      | -               | -          | -               |     | FDCA           |
| 11.213           | BB   | 25.36020        | 3.62330e-4 | 9.18877e-3      |     | Furfural       |

Totals : 227.39904

**Figure S4. 84:** HPLC chromatography of HMF. Reaction condition: Fructose (1 mmol), DES 1 (1 mmol), 100 °C, 30 min.

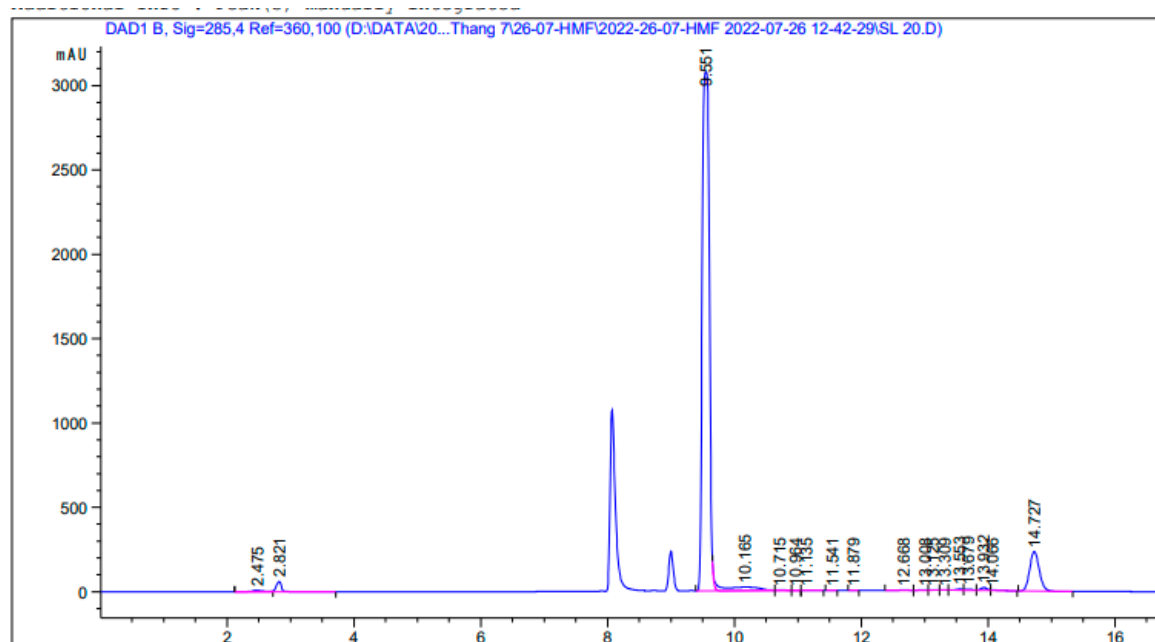

#### External Standard Report

Sorted By : Signal  
 Calib. Data Modified : 6/18/2022 1:43:53 AM  
 Multiplier : 1.0000  
 Dilution : 1.0000  
 Do not use Multiplier & Dilution Factor with ISTDs

Signal 1: DAD1 B, Sig=285,4 Ref=360,100

| RetTime<br>[min] | Type | Area<br>[mAU*s] | Amt/Area   | Amount<br>[ppm] | Grp | Name           |
|------------------|------|-----------------|------------|-----------------|-----|----------------|
| 8.900            | -    | -               | -          | -               | -   | Levulinic acid |
| 9.551            | BV R | 2.35853e4       | 9.63251e-3 | 227.18598       | -   | HMF            |
| 10.715           | VV E | 32.72031        | 2.02674e-2 | 6.63155e-1      | -   | DFF            |
| 11.135           | BB   | 12.04596        | 0.00000    | 0.00000         | -   | FDCA           |
| 11.541           | BB   | 4.30715         | 0.00000    | 0.00000         | -   | Furfural       |

**Figure S4. 85:** HPLC chromatography of HMF. Reaction condition: Fructose (1 mmol), DES 1 (1 mmol), 100 °C, 60 min.

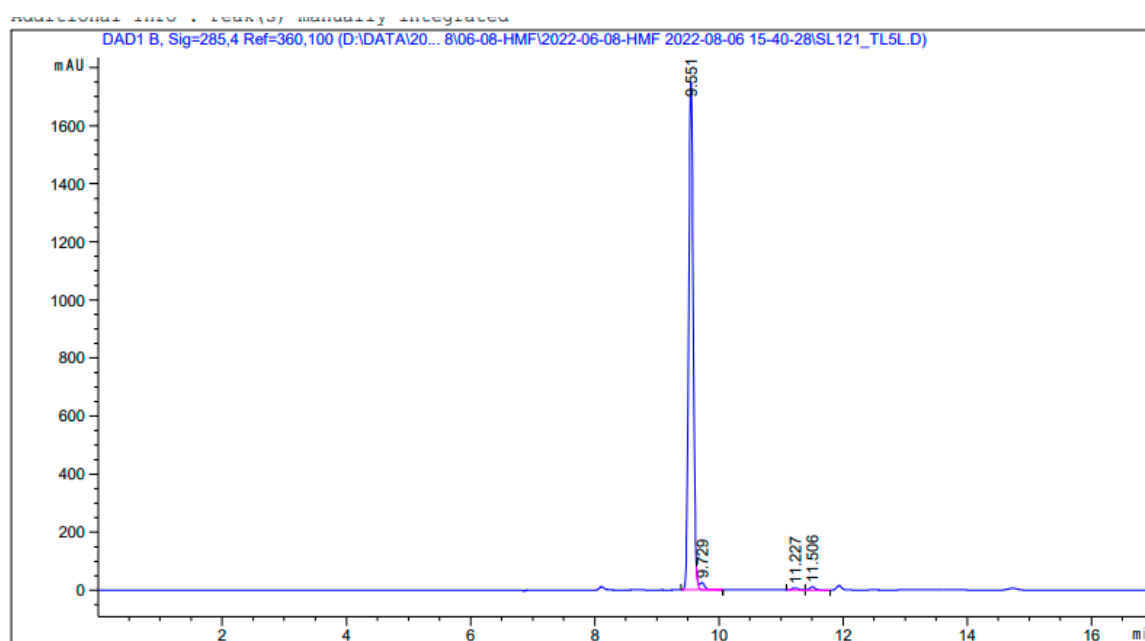

=====

External Standard Report

=====

Sorted By : Signal

Calib. Data Modified : 8/5/2022 1:49:08 AM

Multiplier : 1.0000

Dilution : 1.0000

Do not use Multiplier & Dilution Factor with ISTDs

Signal 1: DAD1 B, Sig=285,4 Ref=360,100

| RetTime<br>[min] | Type | Area<br>[mAU*s] | Amt/Area   | Amount<br>[ppm] | Grp | Name           |
|------------------|------|-----------------|------------|-----------------|-----|----------------|
| 8.900            |      | -               | -          | -               |     | Levulinic acid |
| 9.551            | VV R | 8978.54102      | 9.60502e-3 | 86.23908        |     | HMF            |
| 10.201           |      | -               | -          | -               |     | DFF            |
| 11.097           |      | -               | -          | -               |     | FDCA           |
| 11.227           | BV   | 45.71900        | 4.74997e-3 | 2.17164e-1      |     | Furfural       |

**Figure S4. 86:** HPLC chromatography of HMF. Reaction condition: Fructose (1 mmol), DES 1 (10 mmol), 100 °C, 5 min.

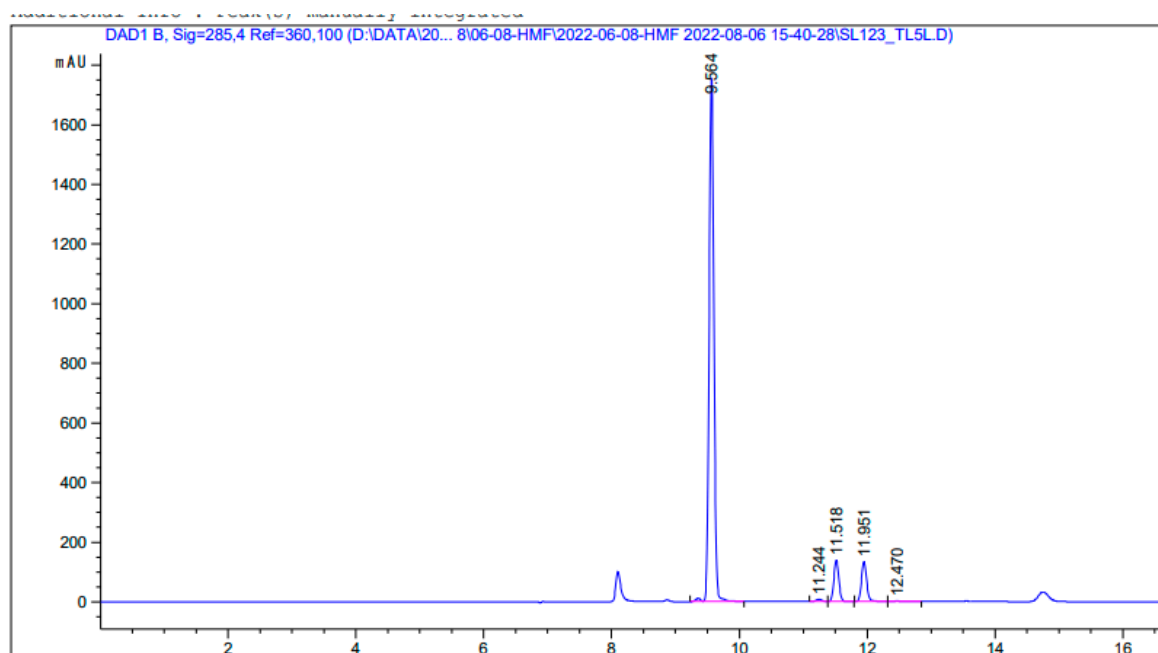

External Standard Report

Sorted By : Signal  
 Calib. Data Modified : 8/5/2022 1:49:08 AM  
 Multiplier : 1.0000  
 Dilution : 1.0000  
 Do not use Multiplier & Dilution Factor with ISTDs

Signal 1: DAD1 B, Sig=285,4 Ref=360,100

| RetTime<br>[min] | Type | Area<br>[mAU*s] | Amt/Area   | Amount<br>[ppm] | Grp | Name           |
|------------------|------|-----------------|------------|-----------------|-----|----------------|
| 8.900            |      | -               | -          | -               |     | Levulinic acid |
| 9.564            | VB R | 9100.50293      | 9.60562e-3 | 87.41594        |     | HMF            |
| 10.201           |      | -               | -          | -               |     | DFF            |
| 11.097           |      | -               | -          | -               |     | FDCA           |
| 11.244           | BV   | 48.74539        | 5.08930e-3 | 2.48080e-1      |     | Furfural       |

**Figure S4. 87:** HPLC chromatography of HMF. Reaction condition: Fructose (1 mmol), DES 1 (10 mmol), 100 °C, 10 min.

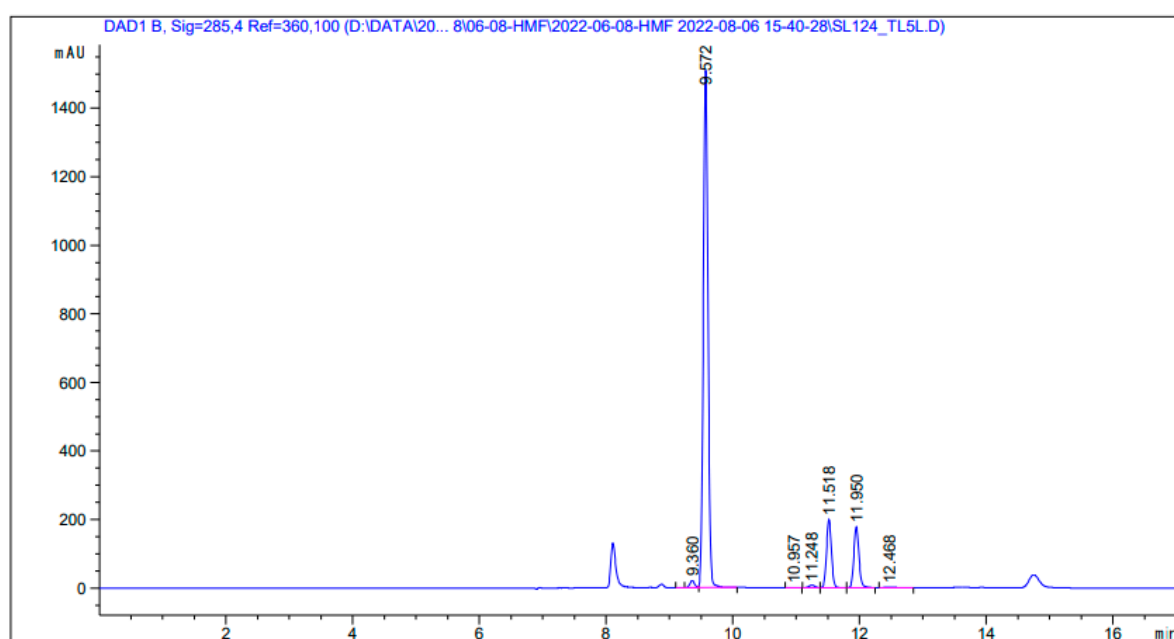

=====  
 External Standard Report  
 =====

Sorted By : Signal  
 Calib. Data Modified : 8/5/2022 1:49:08 AM  
 Multiplier : 1.0000  
 Dilution : 1.0000  
 Do not use Multiplier & Dilution Factor with ISTDs

Signal 1: DAD1 B, Sig=285,4 Ref=360,100

| RetTime<br>[min] | Type | Area<br>[mAU*s] | Amt/Area   | Amount<br>[ppm] | Grp | Name           |
|------------------|------|-----------------|------------|-----------------|-----|----------------|
| 8.900            |      | -               | -          | -               |     | Levulinic acid |
| 9.572            | VB R | 7739.05518      | 9.59791e-3 | 74.27877        |     | HMF            |
| 10.201           |      | -               | -          | -               |     | DFF            |
| 10.957           | BB   | 4.09889         | 0.00000    | 0.00000         |     | FDCA           |
| 11.248           | BV   | 46.98206        | 4.89691e-3 | 2.30067e-1      |     | Furfural       |

**Figure S4. 88:** HPLC chromatography of HMF. Reaction condition: Fructose (1 mmol), DES 1 (10 mmol), 100 °C, 20 min.

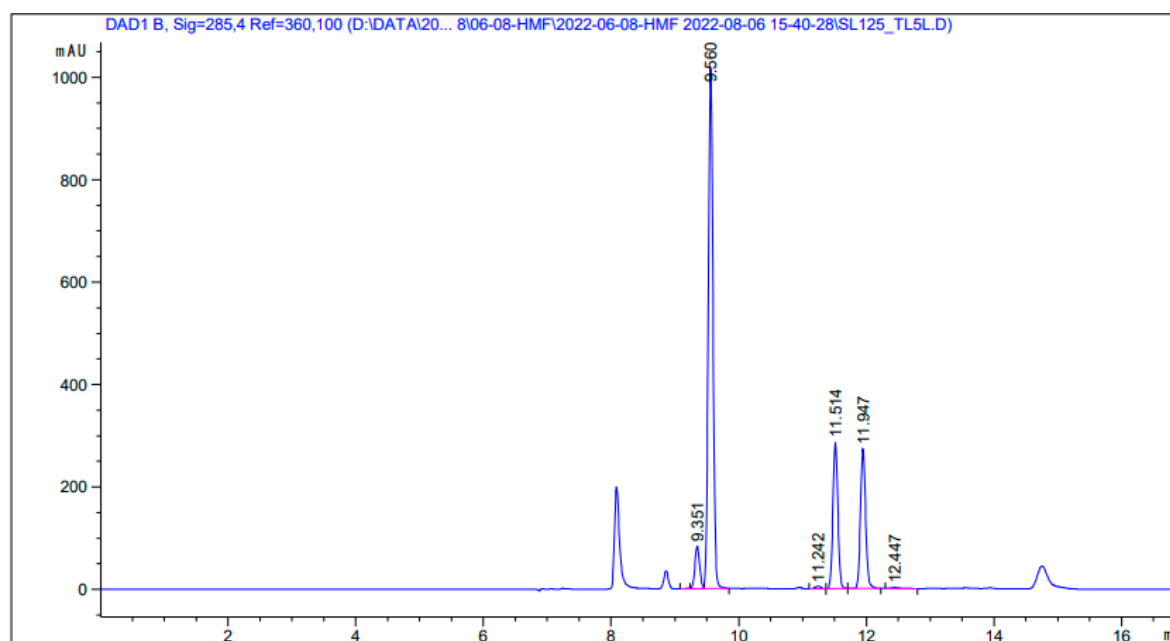

=====  
 External Standard Report  
 =====

Sorted By : Signal  
 Calib. Data Modified : 8/5/2022 1:49:08 AM  
 Multiplier : 1.0000  
 Dilution : 1.0000  
 Do not use Multiplier & Dilution Factor with ISTDs

Signal 1: DAD1 B, Sig=285,4 Ref=360,100

| RetTime<br>[min] | Type | Area<br>[mAU*s] | Amt/Area   | Amount<br>[ppm] | Grp | Name           |
|------------------|------|-----------------|------------|-----------------|-----|----------------|
| 8.900            |      | -               | -          | -               |     | Levulinic acid |
| 9.560            | VB R | 5204.16455      | 9.57283e-3 | 49.81857        |     | HMF            |
| 10.201           |      | -               | -          | -               |     | DFF            |
| 11.097           |      | -               | -          | -               |     | FDCA           |
| 11.242           | BB   | 30.24692        | 1.95422e-3 | 5.91090e-2      |     | Furfural       |

**Figure S4. 89:** HPLC chromatography of HMF. Reaction condition: Fructose (1 mmol), DES 1 (10 mmol), 100 °C, 30 min.



=====  
 External Standard Report  
 =====

Sorted By : Signal  
 Calib. Data Modified : 8/5/2022 1:49:08 AM  
 Multiplier : 1.0000  
 Dilution : 1.0000  
 Do not use Multiplier & Dilution Factor with ISTDs

Signal 1: DAD1 B, Sig=285,4 Ref=360,100

| RetTime<br>[min] | Type | Area<br>[mAU*s] | Amt/Area   | Amount<br>[ppm] | Grp | Name           |
|------------------|------|-----------------|------------|-----------------|-----|----------------|
| 8.900            |      | -               | -          | -               |     | Levulinic acid |
| 9.560            | VB R | 5204.16455      | 9.57283e-3 | 49.81857        |     | HMF            |
| 10.201           |      | -               | -          | -               |     | DFF            |
| 11.097           |      | -               | -          | -               |     | FDCA           |
| 11.242           | BB   | 30.24692        | 1.95422e-3 | 5.91090e-2      |     | Furfural       |

**Figure S4. 90:** HPLC chromatography of HMF. Reaction condition: Fructose (1 mmol), DES 1 (10 mmol), 100 °C, 60 min.
